# Supplementary material for: Unique transposon landscapes are pervasive across Drosophila melanogaster genomes
Source: PubMed Central journal article supplement (PMC4678822; doi:10.1093/nar/gkv1193), 2015-11-17
Supplement: supp_gkv1193_nar-02846-h-2015-File003.pdf [file supp_gkv1193_nar-02846-h-2015-File003.pdf]

Rahman, et al.

## SUPPLEMENTARY MATERIALS

### SUPPLEMENTAL FIGURES AND TABLES LEGENDS

#### **Figure S1. Detailed flowchart of the TIDAL program.**

After the split, transposon insertions are detected through the steps on the left, while deletions are detected through the steps on the right. Complete parameter details are described in the Methods section.

#### **Figure S2. Comparison of the overall transposon distributions and genomic architecture between the current Release6/dm6 build and the previous Release5/dm3 build, and functional annotations of TE InDels in cell line genomes.**

(A) The percentage content of RepeatMasker masked sequences per 50kb window is shown above the banding patterns for each chromosome of the *D. melanogaster* genome. Many of the regions previously absent in the diagrams for Release5/dm3 were not assembled as contiguous portions of the main chromosome arms. (B) Proportions of the functional annotations for TE InDels in the various cell line genomes. This panel relates to Fig. 2.

#### **Figure S3. Genomic PCR validation of TIDAL predictions for *D. melanogaster* S2c1 cells (Part 1) and ISO1 sub-strains (Part 2).**

**Part 1:** (A) Transposon insertions validation tests for S2c1 cells predictions. Top, schematic of primers designed to flank the TE insertion by pairing to unique genomic sequence. Middle, gels of 15 sites tested by PCR with genomic DNA from S2c1 cells, and ISO1-BL and RAL-362 flies. Bottom, table listing the loci with TE insertions tested in the PCR assays above. (B) Transposons deletions validation tests for S2c1 cells predictions. Top, schematic of primers designed to flank the TE depletion by pairing to unique genomic sequence. Middle, gels of 10 sites tested by PCR with genomic DNA from S2c1 cells, and ISO1-BL and RAL-362 flies. Bottom, table listing the loci with TE deletions tested in the PCR assays above. Asterisks mark judgement calls for validations based on the absence of the reference genome allele for TE Insertions and

presence of a smaller band in the TE Depletions as an indication that the PCR result was supportive of the TIDAL prediction. **Part 2: (C)** Transposon insertions validation tests for ISO1-BL predictions. Top, schematic of primers designed to flank the TE insertion by pairing to unique genomic sequence. Middle, gels of 12 sites tested by PCR with genomic DNA from RAL-362, ISO1-UC, and ISO1-BL flies. Bottom, table listing the loci with TE insertions tested in the PCR assays above. **(D)** Transposons depletions validation tests for ISO1-BL predictions. Top, schematic of primers designed to flank the TE depletion by pairing to unique genomic sequence (left) and a PCR that uses one reverse primer base-pairing to the TE sequence present in the reference genome sequence (right). The reverse primer against the TE is more prone to generating a TE amplicon artifact. Middle, gels of 12 sites tested by PCR with genomic DNA from RAL-362, ISO1-UC, and ISO1-BL flies. Left gels are PCRs from primers that both flank the TE, while the right gels are PCRs with one reverse primer against TE sequence, which tends to fail more frequently with primer dimers. Bottom, table listing the loci with TE depletions tested in the PCR assays above.

**Figure S4. Additional analyses of TEs in Canton-S sub-strains.**

**(A)** Euler diagrams showing the overlap of TE InDels between sub-strains from 5 different labs, with all TE InDels in the top diagrams, whereas below are only the TE InDels with  $CR \geq 3.0$ . **(B)** Similar Euler diagrams as in **(A)** except that the CanS-JC sub-strain replaces the CanS-SH sub-strain. These diagrams are to illustrate the notably stronger overlap in TE insertions between the CanS-JC and the CanS-TP sub-strains, which are two lines maintained independently but both originating from the same single lab source. **(C)** Proportions of all of the InDels by TE family between the CanS sub-strains. **(D)** Proportions of InDels with  $CR \geq 3.0$  by TE family between the CanS sub-strains, which is generally similar to the proportions of all TE InDels in **(C)**. **(E)** Proportions of the genomic functional annotations immediately near the sites of TE InDels. **(F)** Scatterplot comparing sequencing depth to numbers of TE InDels detected amongst CanS sub-strain libraries (various combinations of independent sequencing runs). Trend lines show linear relationship between sequencing depth and server

processing time, and logarithmic relationship between depth and numbers of TE InDels detected by TIDAL.

**Figure S5. Additional analyses of TEs in ISO1 sub-strains.**

(A) Euler diagrams comparing the overlap of TE InDels between –BL and –CL sub-strain of ISO1, (B) between –BL and –AS sub-strains, and (C) between different tissues of the ISO1–AS fly line. Abbreviations: BL, Bloomington; CL, Charles Langley lab; AS, Alan Spradling lab; HEm12, Haploid Embryo samples 1&2; Ova, Ovaries; LSg123, Larval Salivary gland samples 1,2,3; Emb123, Embryos sample 1,2,3. The ISO1-BL library is from adult females from the Bloomington Drosophila Stock Center, the ISO1-CL libraries (whole flies and haploid embryos) are from the Langley lab, and the ISO1-AS libraries (ovaries, embryos, and larval salivary glands) are from the Spradling lab. (D) Proportions of InDels by TE family between ISO1 sub-strains. (E) Comparison of the InDels proportions by TE family predicted by TIDAL from different combinations of sequencing runs of the ISO1-BL libraries. Greater sequencing depth generally uncovers the rarer TE InDels in the genomic library. (F) Scatterplot comparing sequencing depth to numbers of TE InDels detected amongst ISO1 sub-strains. Trend lines show linear relationship between sequencing depth and server processing time, and logarithmic relationship between depth and numbers of TE InDels detected by TIDAL. (G) Scatterplot comparing sequencing depth to numbers of TE InDels detected amongst various combinations of independent sequencing runs of the ISO1-BL library. (H) Calculations of transposition rates in the ISO1-BL sub-strain for each TE per genomic copy and per generation, assuming that ~450 generations (~15 years between the sequencing of ISO1-BL and the original reference genome isolate, and an average 12 day life cycle).

**Figure S6. Additional benchmarking results comparing TIDAL with LnB, CnT, and TEMP programs for TE insertion predictions in DGRP fly strains.**

(A) For DGRP strains that are only analyzed by TEMP and TIDAL, there is much greater overlap in TE depletion predictions between the two programs (red bars) compared to the TE insertion predictions. (B) Table comparing the general design,

distinctions, and limitations of our TIDAL program compared to the other three programs with common outputs for DGRP strains. A diagram of chromosome 4's high density of transposons, from Figure S2, is shown as a reminder for how false positives can be spotted in other programs. **(C)** Euler diagrams of the overlap in TE insertions predicted by all four programs for RAL-109 and RAL-391 strains, with diagrams on the left showing all TE insertions and the diagrams on the right that lack obvious false positives such as Chr4 and Chr#Het predictions, these are frequently repetitive genomic loci that for some reason have not been masked by RepeatMasker. Note the removal of these false positives largely only reduce the predictions unique to TEMP and CnT programs.

**Figure S7. Comparison of genomic PCR validation tests between TIDAL, LnB, CnT and TEMP programs for transposon insertions predictions for the RAL-765 strains.** **(A)** Transposon insertions only predicted by TIDAL. Top, gels of 12 sites tested by PCR with genomic DNA from RAL-765, RAL-362, RAL-517, and ISO1-BL flies. Bottom, table listing the loci with TE insertions tested in the PCR assays above. The same format of panel A extends to panels B, C, and D. **(B)** Transposon insertions predicted by LnB which also mostly overlap with TIDAL calls. **(C)** Transposon insertions only predicted by the TEMP program. **(D)** Transposon insertions only predicted by the CnT program. Asterisks mark judgement calls for validations based on the absence of the reference genome allele for TE Insertions and presence of a smaller band in the TE Depletions as an indication that the PCR result was supportive of the TIDAL prediction.

**Figure S8. Detailed profiles of transposon depletion landscapes in DGRP and DGN fly strains and pools of flies.** **(A)** 45 DGRP Fly strains. **(B)** 46 DGN Fly strains. **(C)** 32 Pools of flies. The top panels show the total counts of transposon insertions, the middle panels show the proportions of each transposon class, and the bottom panels show the proportions of the transposon species with  $\geq 20$  insertions (the rest are grouped together at the top). The dashed lines and labels in the bottom panels mark notable transposon species.

**Figure S9. Detailed profiles of transposon insertion landscapes in DGRP and DGN fly strains and pools of flies, referring to the abridged profiles in Fig. 5. (A) 45 DGRP Fly strains. (B) 46 DGN Fly strains. (C) 32 Pools of flies.** The top panels show the total counts of transposon insertions, the middle panels show the proportions of each transposon class, and the bottom panels show the proportions of the transposon species with  $\geq 20$  insertions (the rest are grouped together at the top). The dashed lines and labels in the bottom panels mark notable transposon species.

**Table S1. Details and accession numbers for Illumina libraries of *D. melanogaster* cell lines and fly strains analyzed in this study and incorporated into the TIDAL-Fly database.** There are 5 tabs in this worksheet. (A) *D. melanogaster* cell lines. (B) DGRP fly strains. (C) DGN fly strains. (D) Key for the demographics of DGN fly strains. (E) Pools of flies.

**Table S2. Oligonucleotides used in this study.**

Rahman, et al.  
Figure S1.

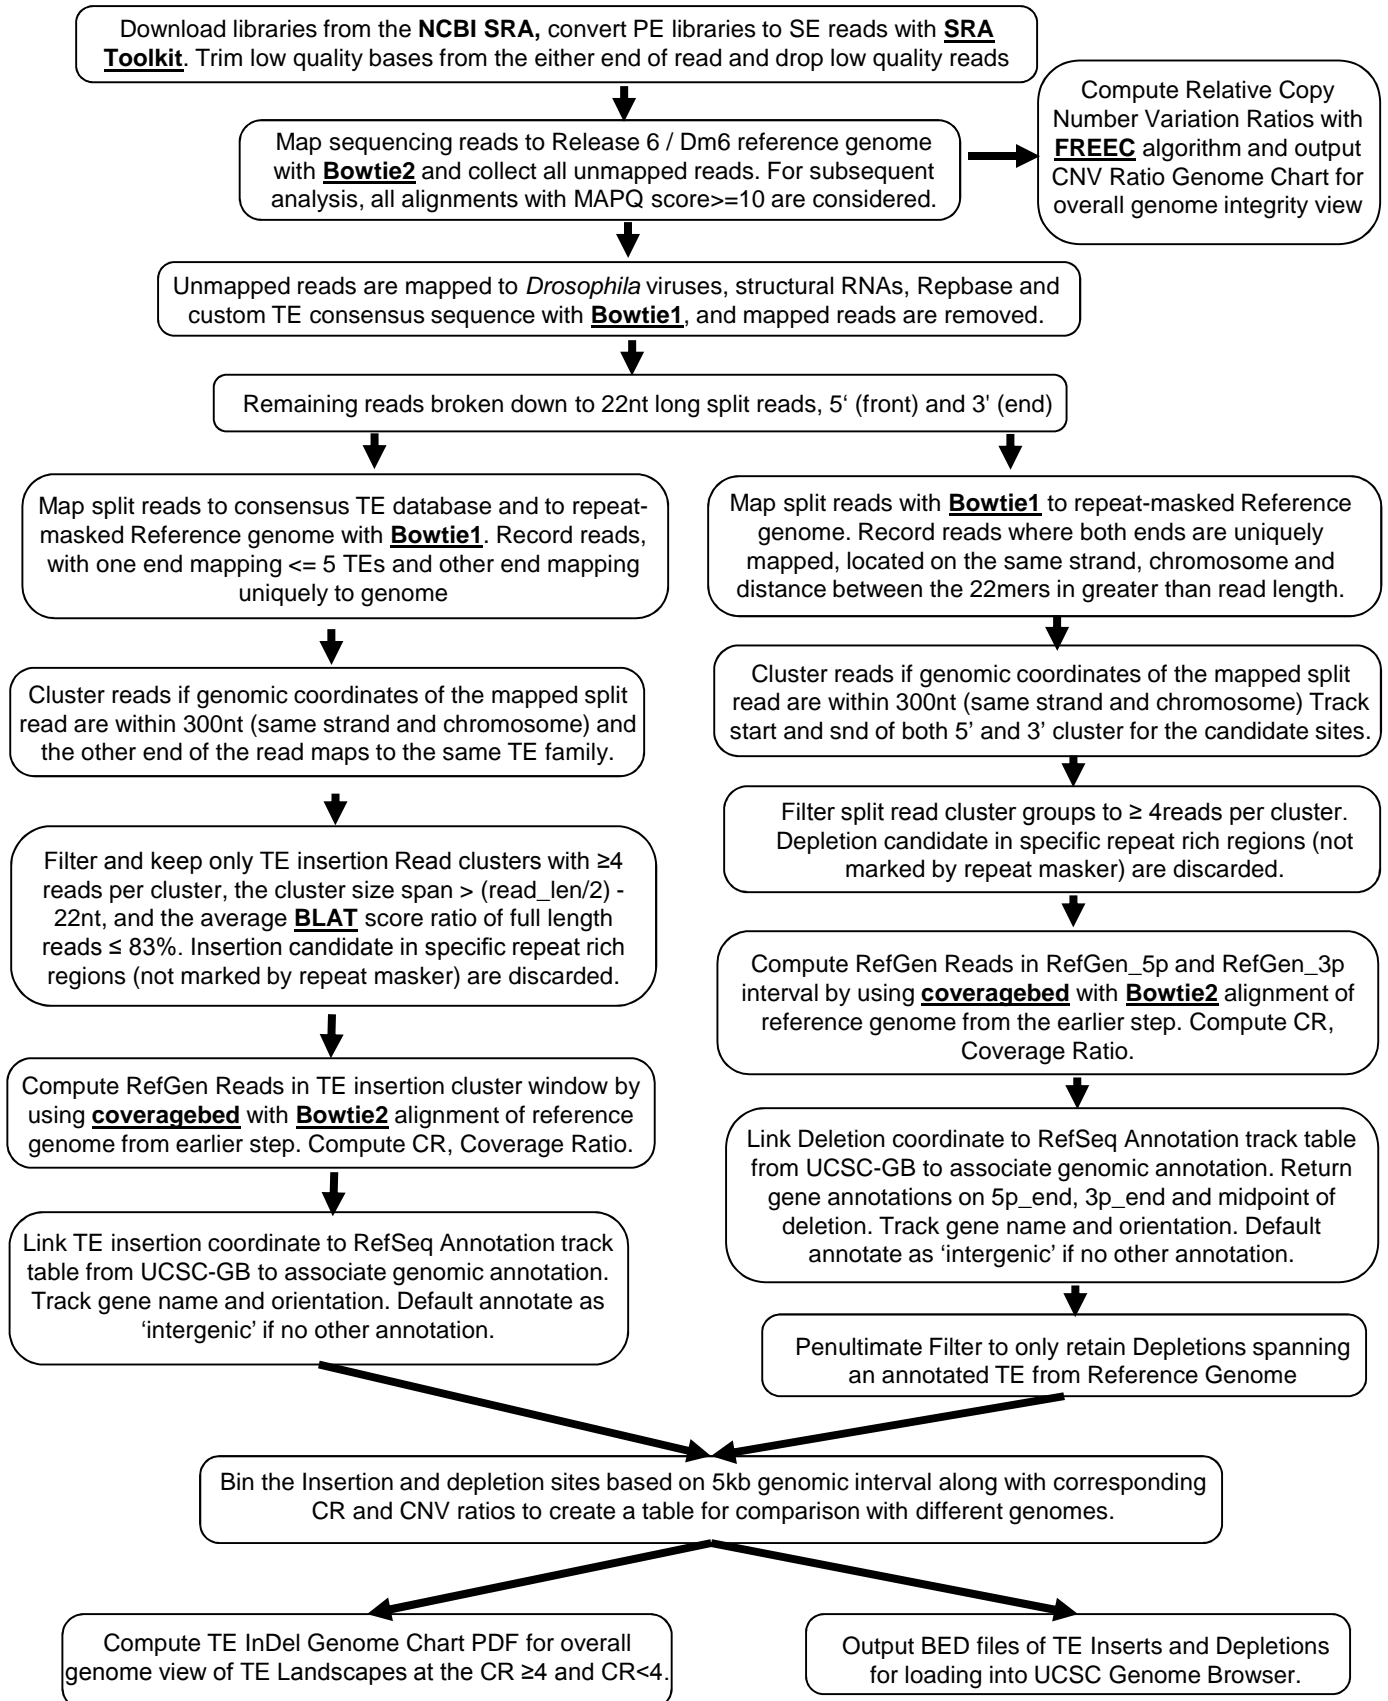

See Methods Text for details of program parameters and equations.

Rahman et al.  
Figure S2.

**A**

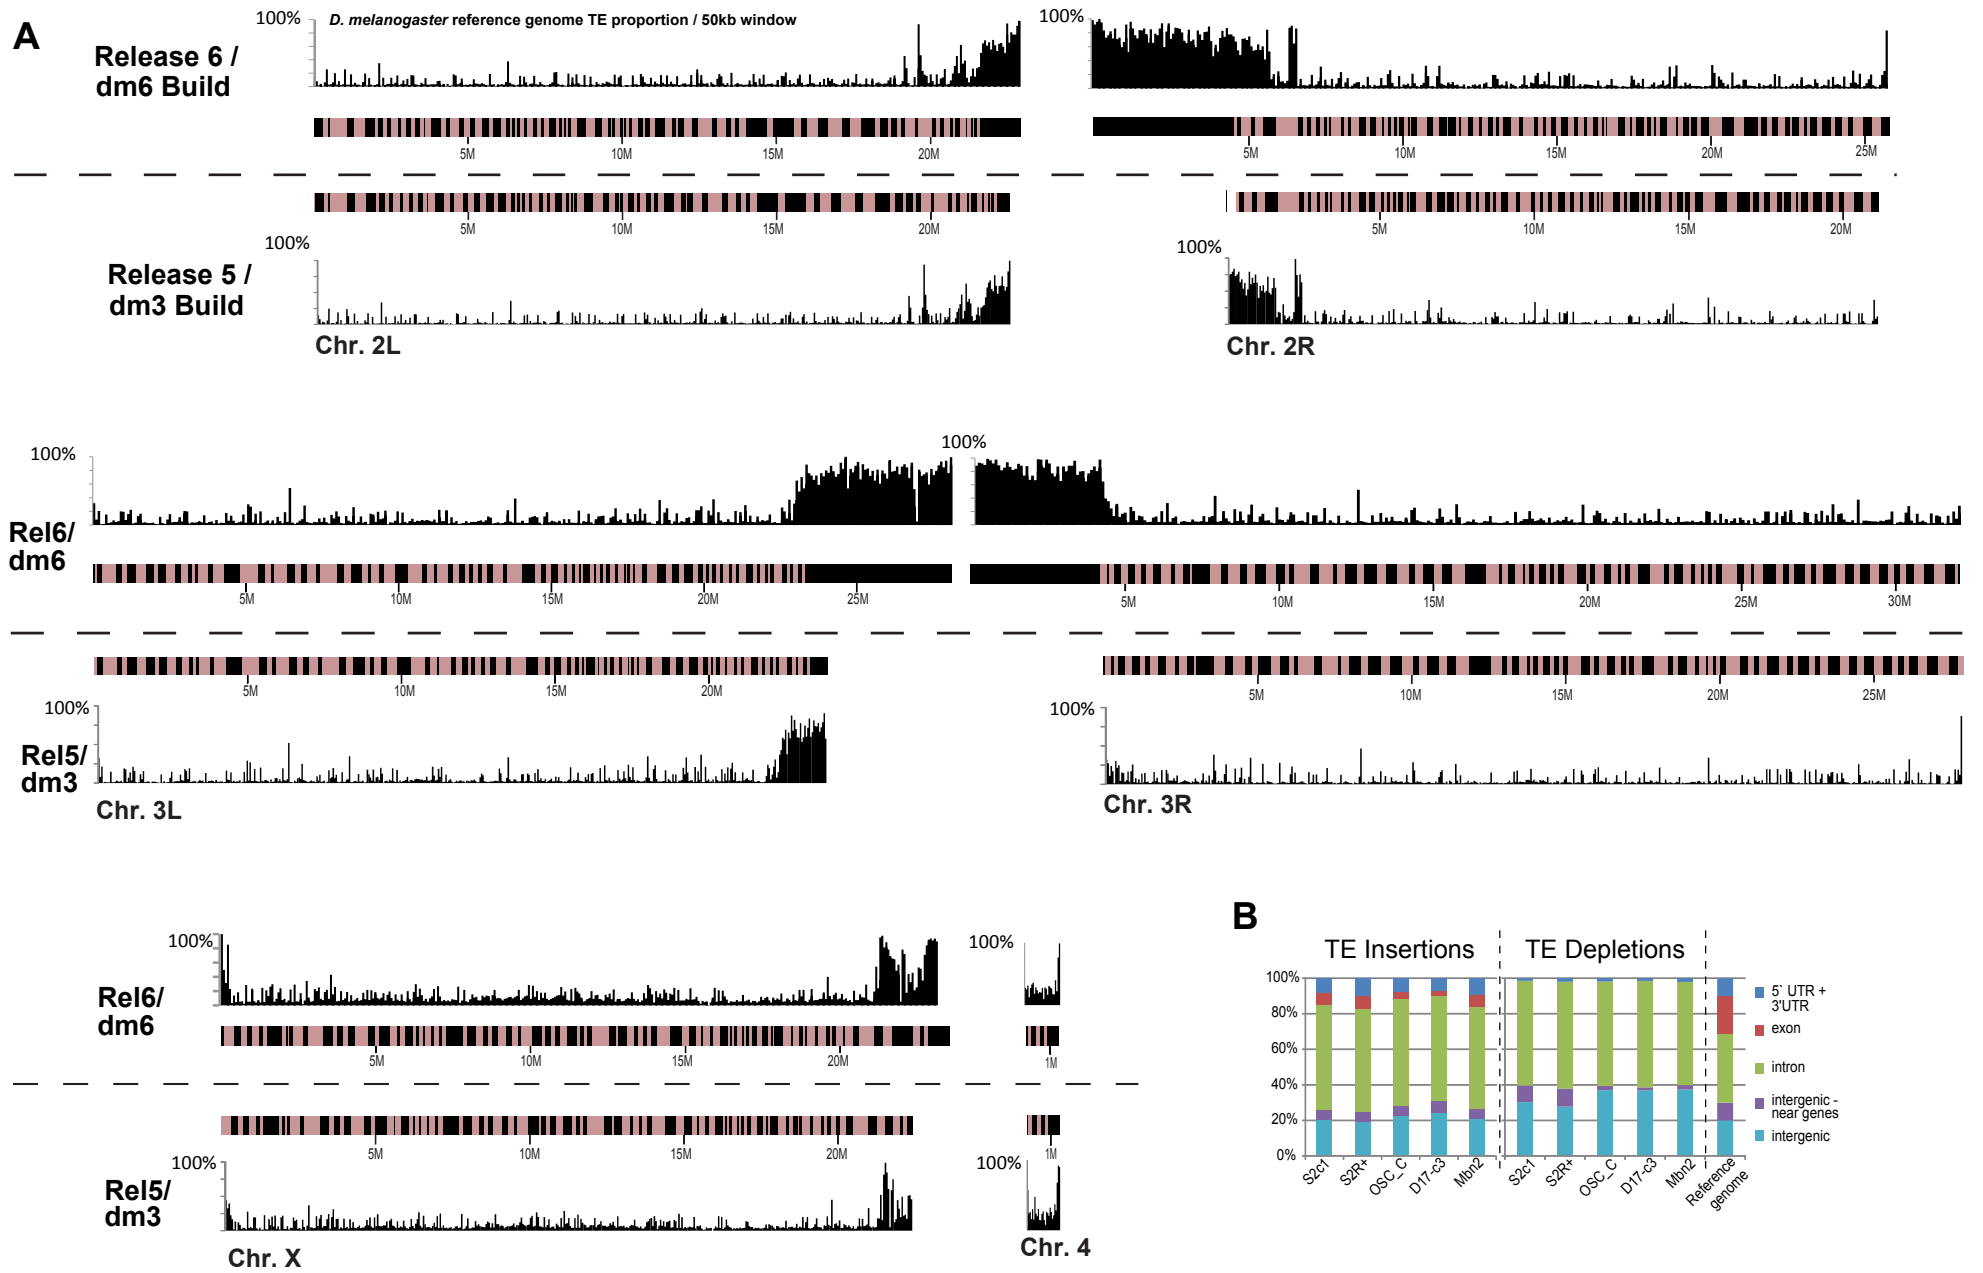

**B**

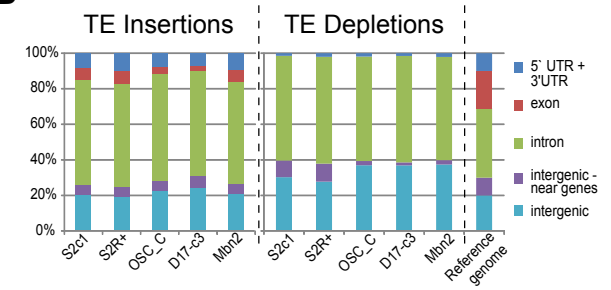

**A**

**TE insertions genomic PCR**

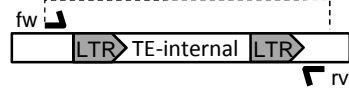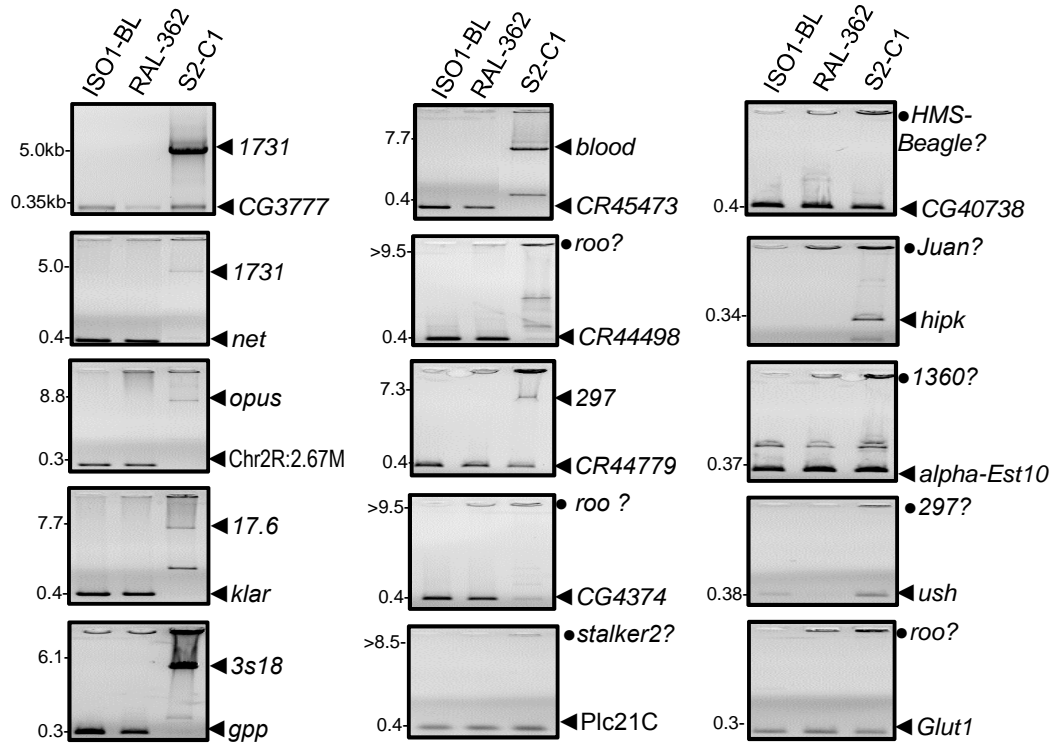

**B**

**TE depletions genomic PCR**

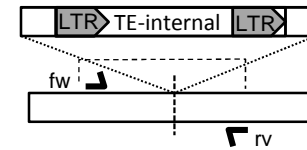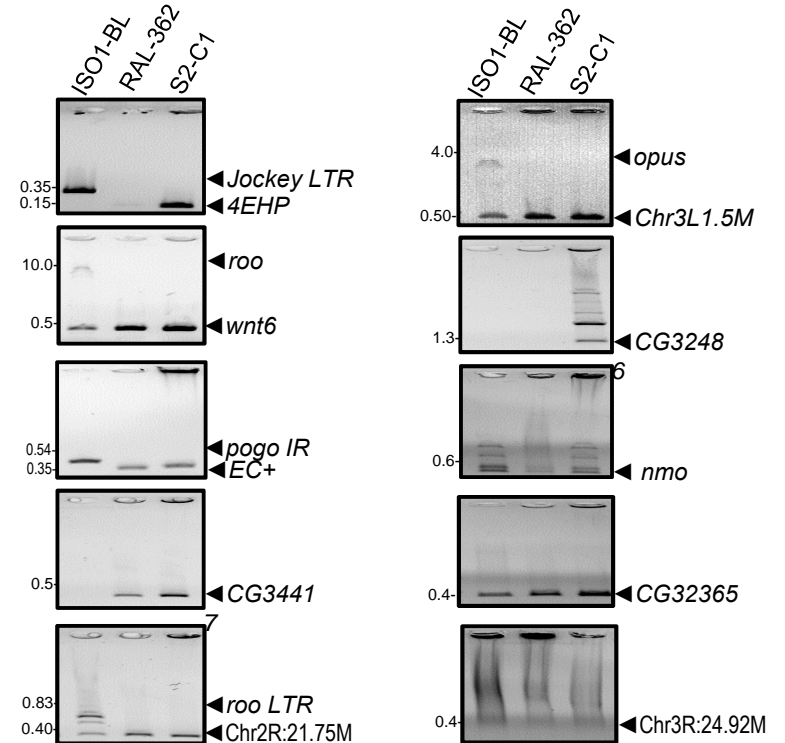

| Site. No. | T.E.       | Locus                   | Nearest Gene       | Coverage Ratio | Size w/o insertion | Size with insertion | PCR evidence |
|-----------|------------|-------------------------|--------------------|----------------|--------------------|---------------------|--------------|
| 1         | 1731       | chrX:325934-326139      | CG3777 +,CG32816 - | 4.5            | 349                | 4998                | yes          |
| 2         | 1731       | chr2L:87055-87258       | net -              | 4              | 404                | 5053                | yes          |
| 3         | opus       | chr2R:2675584-2675743   | not near genes     | 3.4            | 332                | 8891                | yes          |
| 4         | 17.6       | chr3L:516184-516383     | klar -             | 5.1            | 349                | 7788                | yes          |
| 5         | 3S18       | chr3R:6430955-6431163   | gpp +              | 5.6            | 293                | 6126                | yes          |
| 6         | blood      | chrX:141518-141720      | CR45473 -          | 5.6            | 379                | 7790                | yes          |
| 7         | roo        | chrX:6005755-6005959    | CR44498 +          | 5              | 381                | 9473                | yes*         |
| 8         | 297        | chrX:1082310-1082488    | CR44779 +,CG3655 - | 3.7            | 373                | 7368                | yes          |
| 9         | roo        | chr3R:23470563-23470775 | CG4374 -           | 4              | 367                | 9459                | yes*         |
| 10        | Stalker2   | chr2L:312233-312444     | Plc21C +           | 5.9            | 411                | 8661                | no           |
| 11        | HMS-Beagle | chr2R:544728-544940     | CG40378 +          | 4.9            | 353                | 6882                | yes*         |
| 12        | Juan       | chr3L:552782-552981     | hipk +             | 3.3            | 344                | 4580                | no           |
| 13        | 1360       | chr3R:7492347-7492543   | alpha-Est10 -      | 4.7            | 374                | 4480                | no           |
| 14        | 297        | chr2L:522270-522480     | ush +              | 4.9            | 386                | 7381                | no           |
| 15        | roo        | chr3L:957937-958157     | Glut1 +            | 7.6            | 296                | 9388                | no           |

| Site. no. | T.E.     | Locus                   | Nearest Gene   | Coverage Ratio | Size with depletion | Size without depletion | PCR evidence |
|-----------|----------|-------------------------|----------------|----------------|---------------------|------------------------|--------------|
| 1         | jockey   | chr3R:24072059-24072628 | 4EHP -         | 4.5            | 150                 | 341                    | yes          |
| 2         | roo      | chr2L:7343256-7350536   | Wnt6 +         | 4.6            | 5757                | 7480                   | yes          |
| 3         | pogo     | chrX:3842276-3842647    | ec +           | 5.8            | 355                 | 541                    | yes          |
| 4         | Tirant   | chrX:6562758-6571399    | CG34417 +      | 5.2            | 1240                | 8802                   | yes          |
| 5         | roo      | chr2R:21753020-21753663 | not near genes | 5.2            | 405                 | 833                    | yes          |
| 6         | opus     | chr3L:15423693-15426700 | not near genes | 4.6            | 2642                | 3160                   | yes          |
| 7         | Tirant   | chr3L:3061219-3069958   | CG32486 -      | 4.6            | 1350                | 8912                   | yes*         |
| 8         | Stalker4 | chr3L:7886449-7889129   | CG32365 +      | 4.3            | 1107                | 2873                   | no           |
| 9         | NOF      | chr3L:7985303-7987783   | nmo +          | 4.2            | 620                 | 2650                   | no           |
| 10        | Doc      | chr3R:24927069-24932010 | not near genes | 5.7            | 395                 | 5120                   | no           |



C

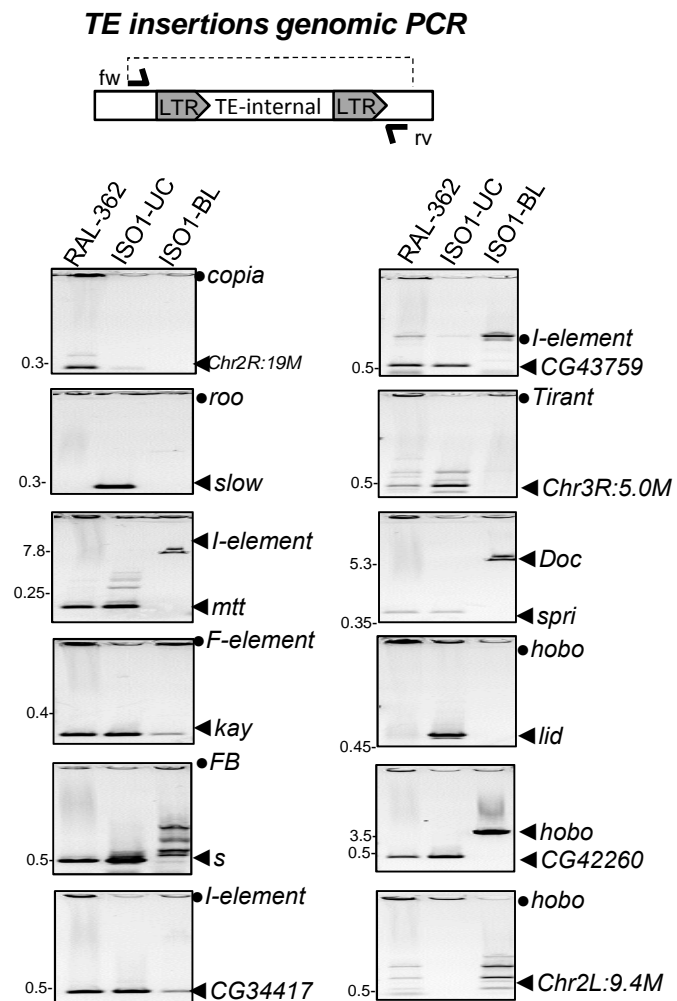

D

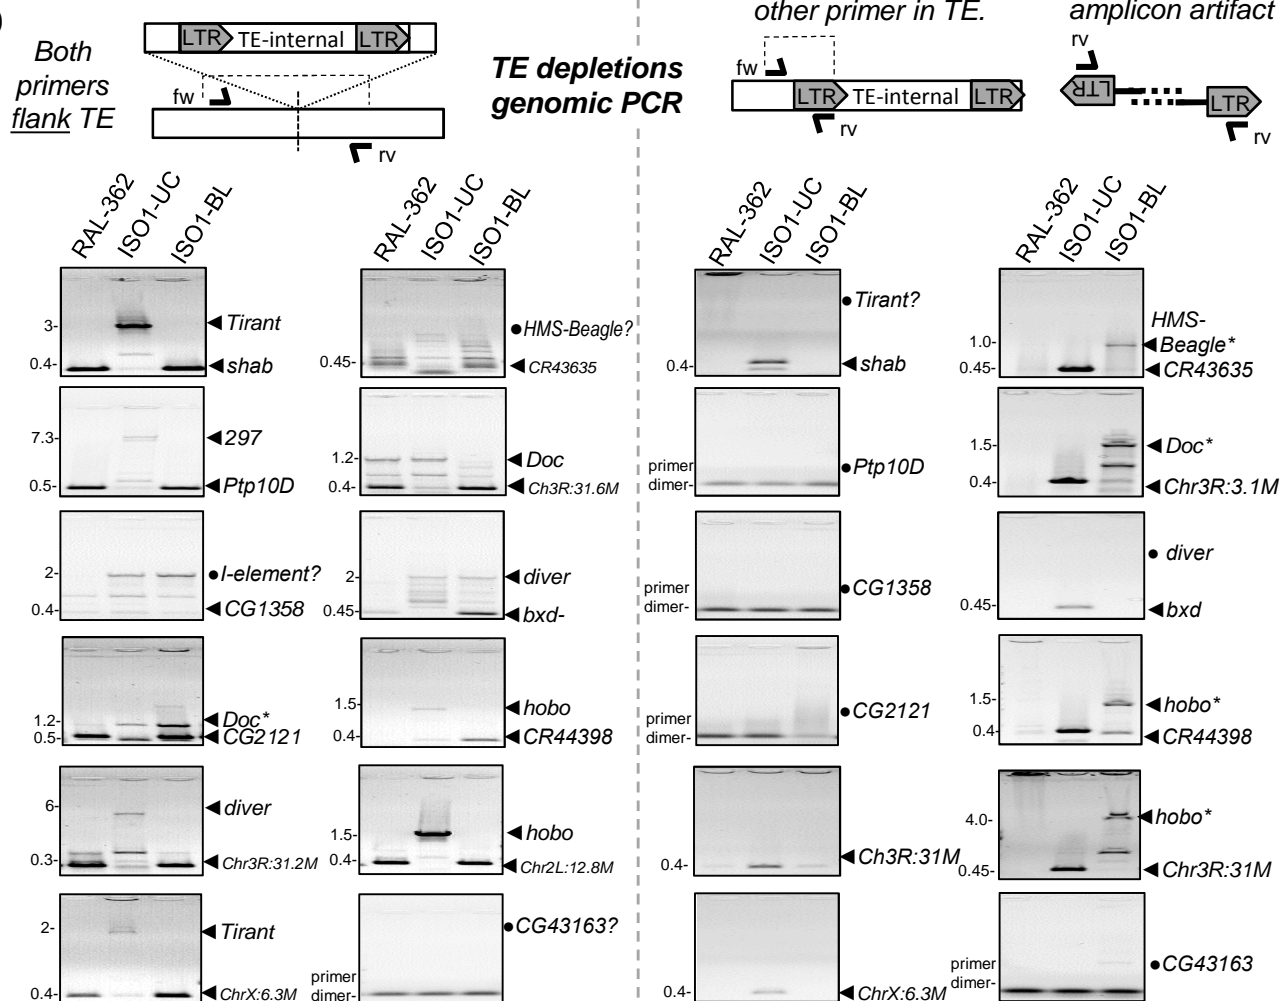

| Site No. | Locus                   | Nearest gene   | T.E.      | C.R. | size w/o insertion | size with insertion | PCR validation |
|----------|-------------------------|----------------|-----------|------|--------------------|---------------------|----------------|
| 1        | chr2R:19768184-19768307 | not near genes | copia     | 4.5  | 295bp              | 5.1kb               | yes            |
| 2        | chr3L:4390337-4390468   | slow           | roo       | 4.5  | 330bp              | 9kb                 | yes            |
| 3        | chr2R:8528862-8528983   | mtt            | I-element | 4.4  | 273bp              | 7.8kb               | yes            |
| 4        | chr3R:29777197-29777247 | kay            | F-element | 17.9 | 414bp              | 5kb                 | yes            |
| 5        | chr2L:1068653-1068778   | s              | FB        | 4.2  | 517bp              | 2kb                 | yes            |
| 6        | chrX:6542904-6543018    | CG34417        | I-element | 4.3  | 501bp              | 7.9 kb              | yes            |
| 7        | chrX:19018636-19018748  | CG43759        | copia     | 4.7  | 469bp              | 5.6kb               | yes            |
| 8        | chr3R:5066592-5066727   | not near genes | Tirant    | 4.4  | 515bp              | 9kb                 | yes            |
| 9        | chrX:10556247-10556301  | spri           | Doc       | 5.7  | 363bp              | 5.3kb               | yes            |
| 10       | chr2L:5999659-5999785   | lid            | hobo      | 5.6  | 479bp              | 3.5kb               | yes            |
| 11       | chr2R:22786248-22786444 | CG42260        | hobo      | 5.3  | 523bp              | 3.5 kb              | yes            |
| 12       | chr2L:9485261-9485390   | not near genes | hobo      | 4.2  | 514bp              | 3.5kb               | no             |

| Site No. | Locus                   | Nearest gene   | T.E.       | C.R. | size with depletion | size without depletion | PCR validation |           |
|----------|-------------------------|----------------|------------|------|---------------------|------------------------|----------------|-----------|
|          |                         |                |            |      |                     |                        | Flank TE       | Gene-T.E. |
| 1        | chr3L:2927813-2927871   | shab+          | Tirant     | 3.5  | 393bp               | 8.5kb                  | Yes            | yes       |
| 2        | chrX:11633392-11633445  | Ptp10D+        | 297        | 2.9  | 497bp               | 7.3kb                  | Yes            | No        |
| 3        | chr2R:7608382-7608431   | CG1358-        | I-element  | 2.6  | 509bp               | 5.4kb                  | No             | No        |
| 4        | chr2R:8398189-8398240   | CG2121-        | Doc        | 3    | 502bp               | 5.0kb                  | Yes*           | No        |
| 5        | chr3R:31279353-31279405 | not near genes | diver      | 2.5  | 436bp               | 6.4kb                  | Yes            | yes       |
| 6        | chrX:6335185-6335241    | not near genes | Tirant     | 4.6  | 380bp               | 2.7kb                  | Yes            | yes       |
| 7        | chr3R:5045818-5045876   | CR43635-       | HMS-Beagle | 4.4  | 448bp               | 7.3kb                  | No             | yes*      |
| 8        | chr3R:31691509-31691562 | not near genes | Doc        | 4.3  | 449bp               | 5.0kb                  | Yes            | yes*      |
| 9        | chr3R:16756294-16756346 | bx-d           | diver      | 3.6  | 436 bp              | 6.4kb                  | Yes            | yes*      |
| 10       | chr2L:17951924-17951978 | CR44398-       | hobo       | 3.5  | 381bp               | 1.7kb                  | Yes            | yes*      |
| 11       | chr2L:12861671-12861728 | not near genes | hobo       | 3.5  | 458bp               | 1.7kb                  | Yes            | yes*      |
| 12       | chr3L:8481746-8481802   | CG43163-       | roo        | 3.3  | 487bp               | 9.4kb                  | No             | No        |

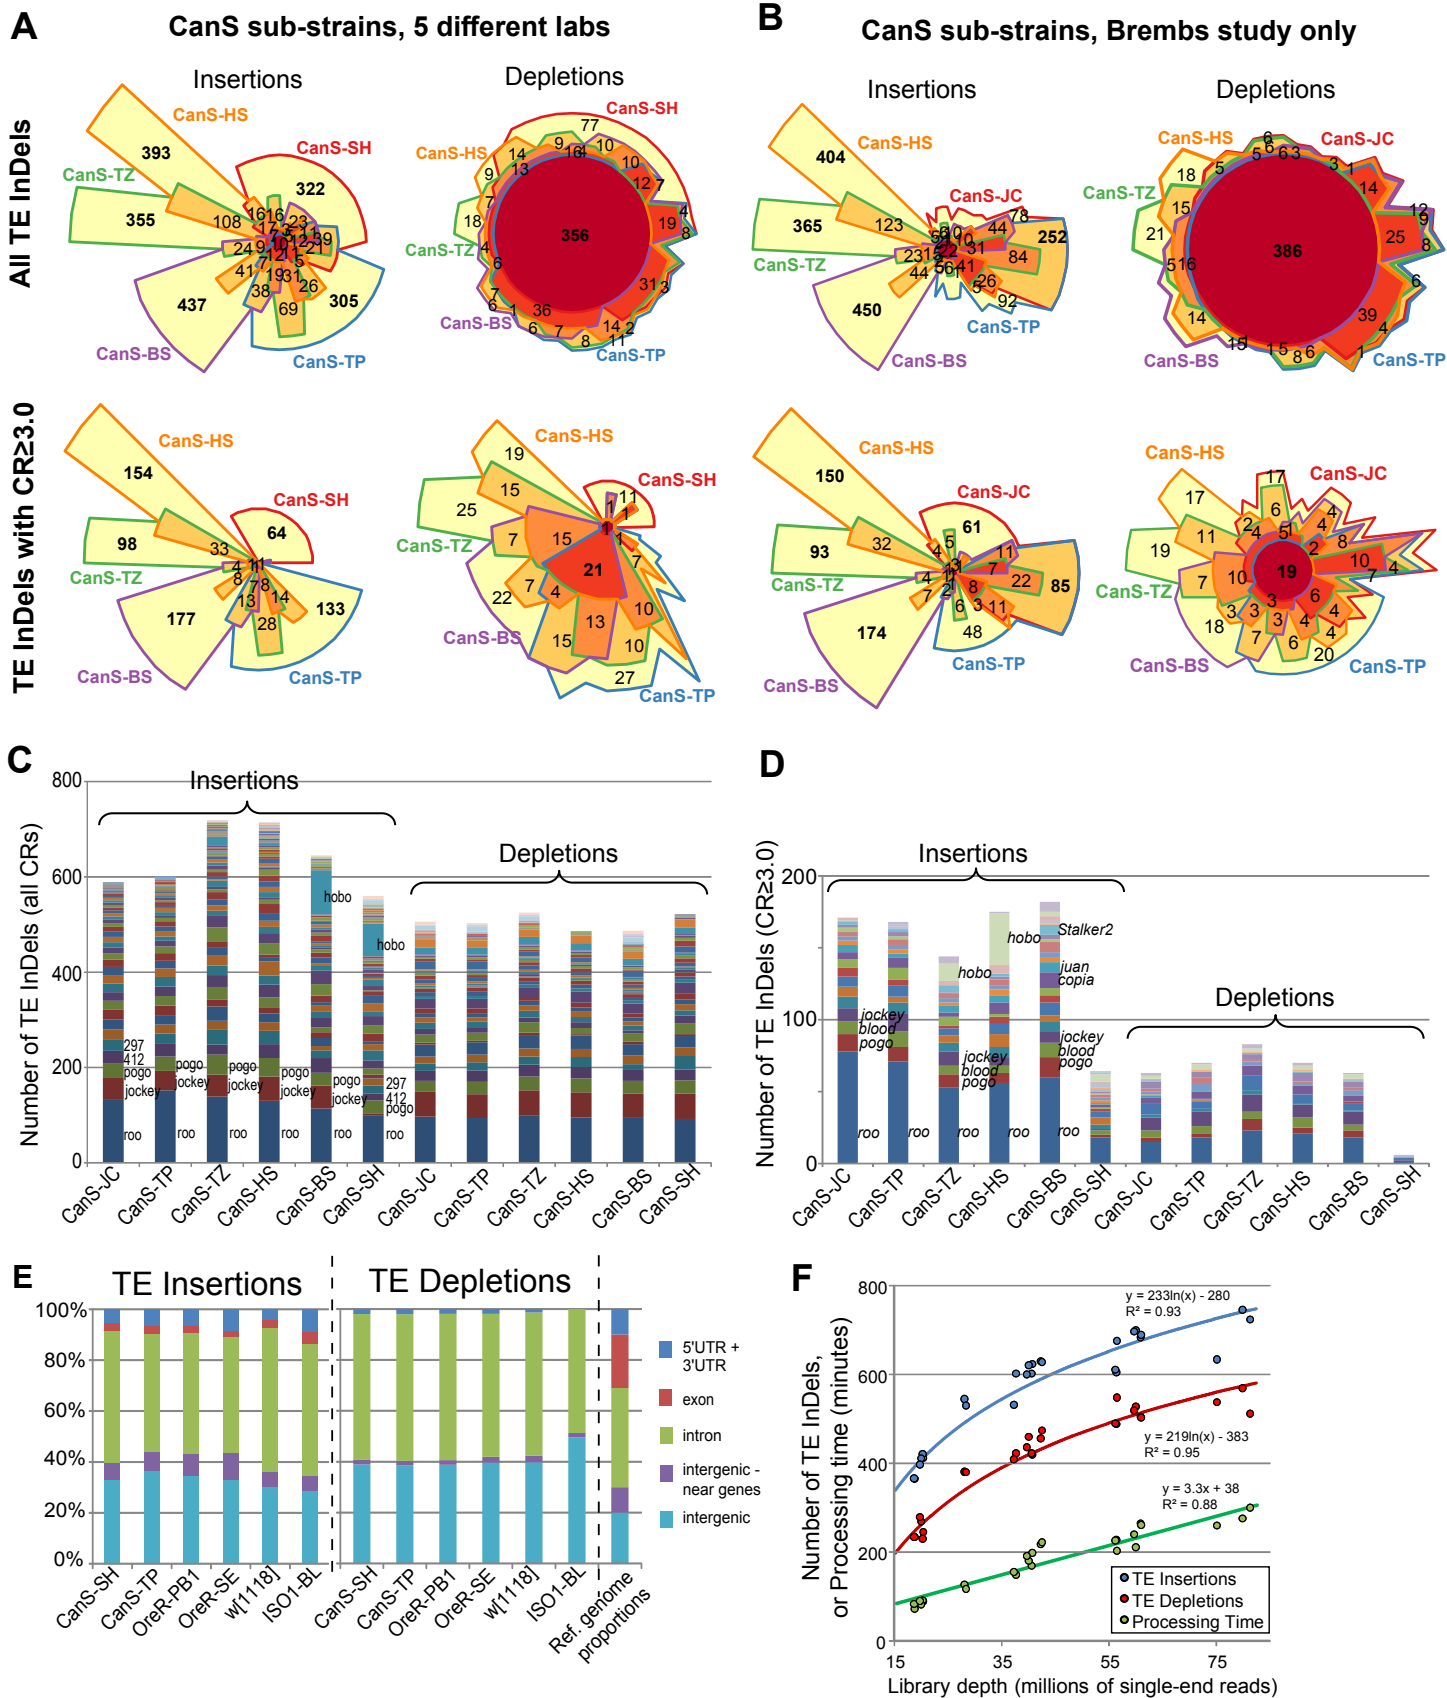

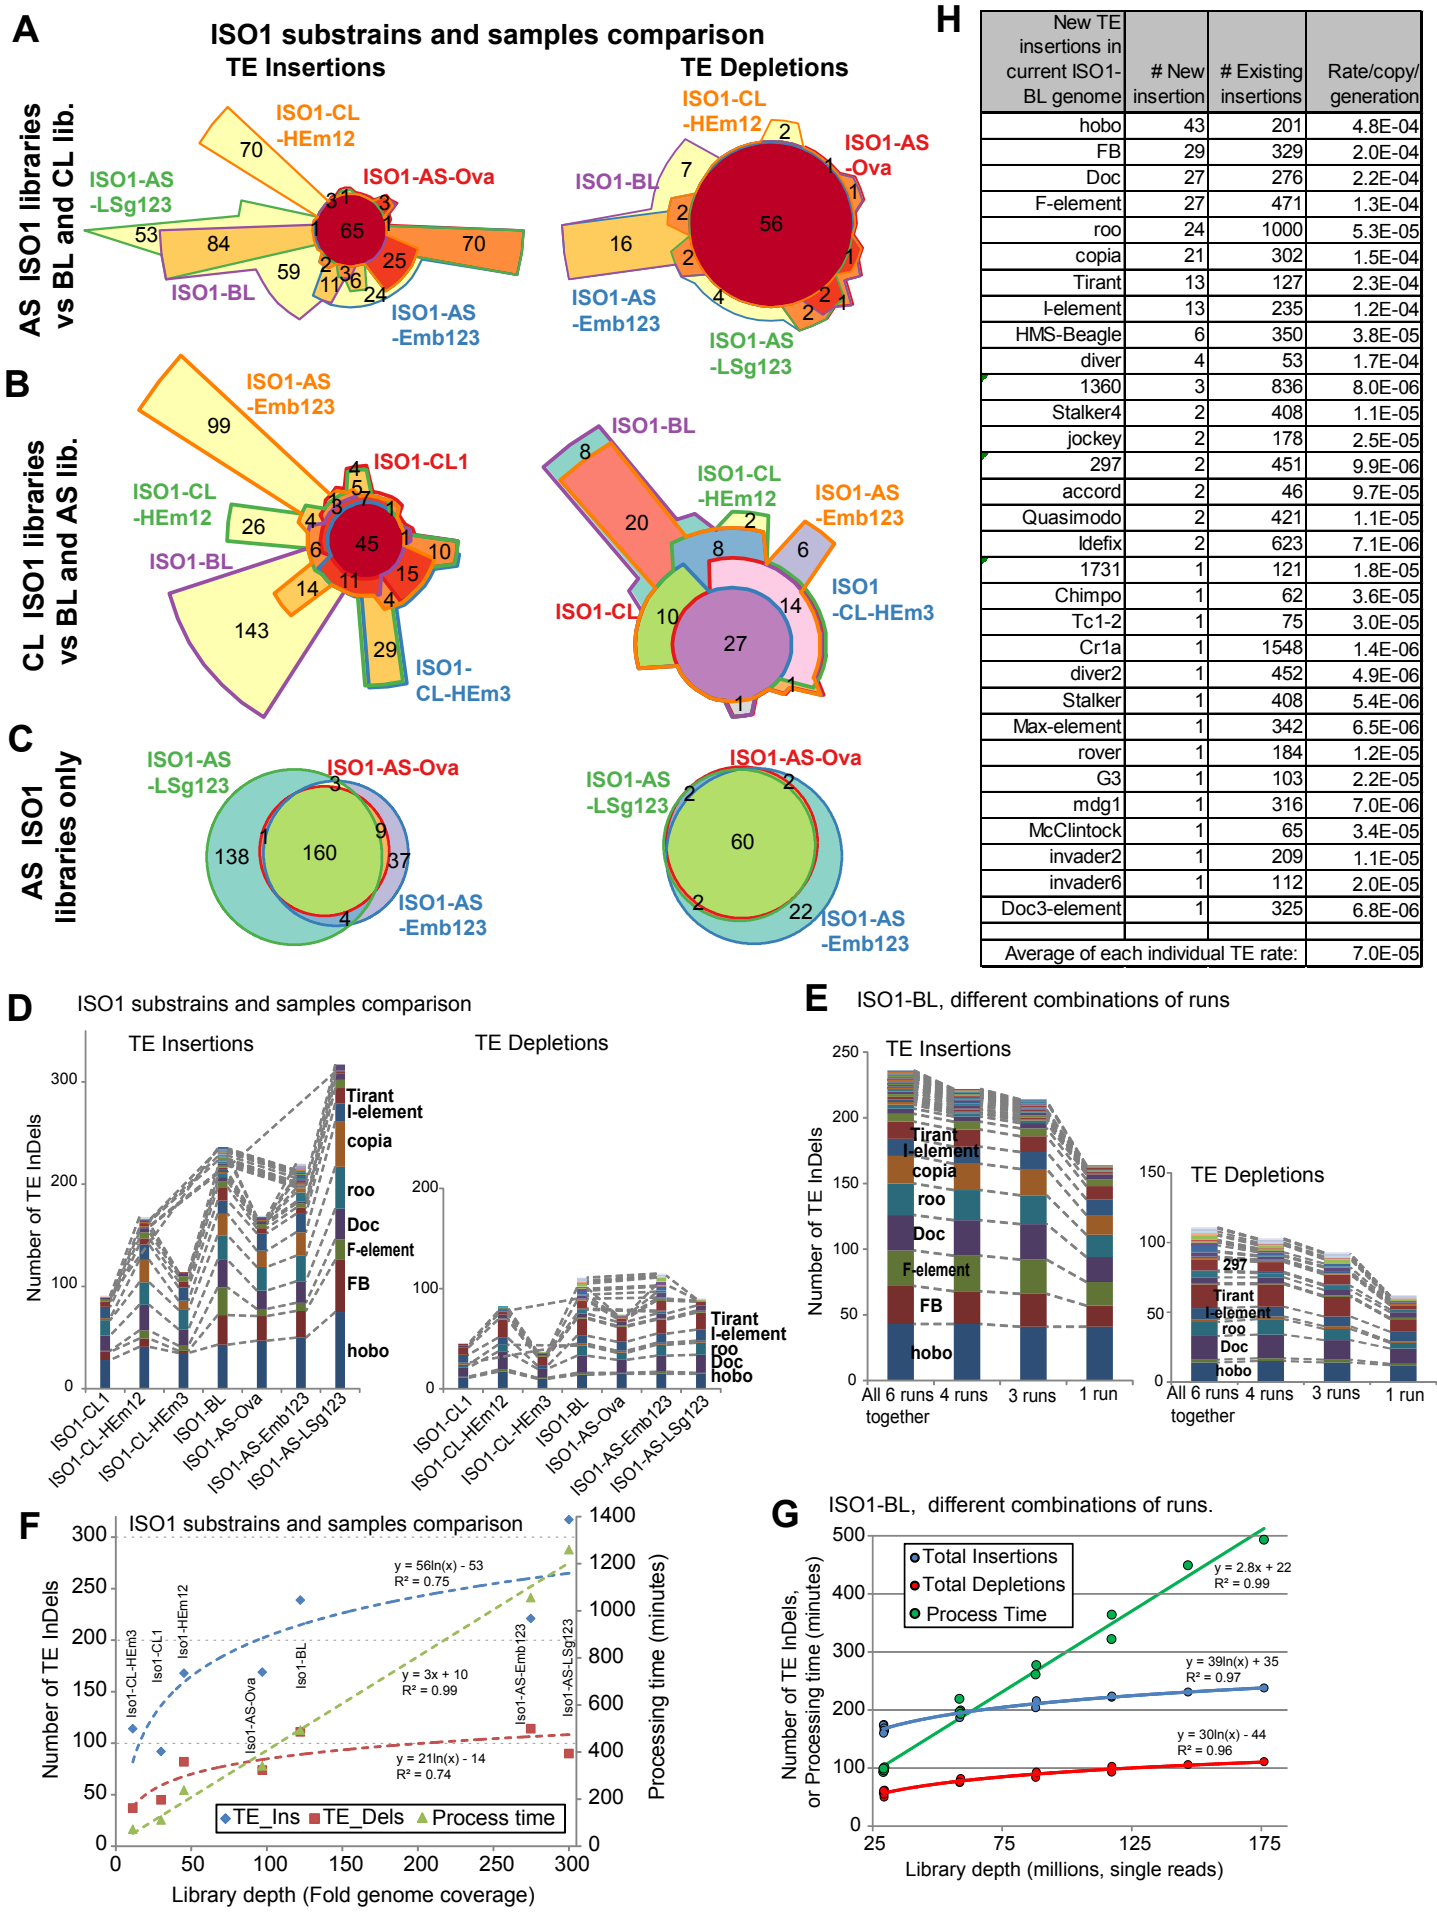

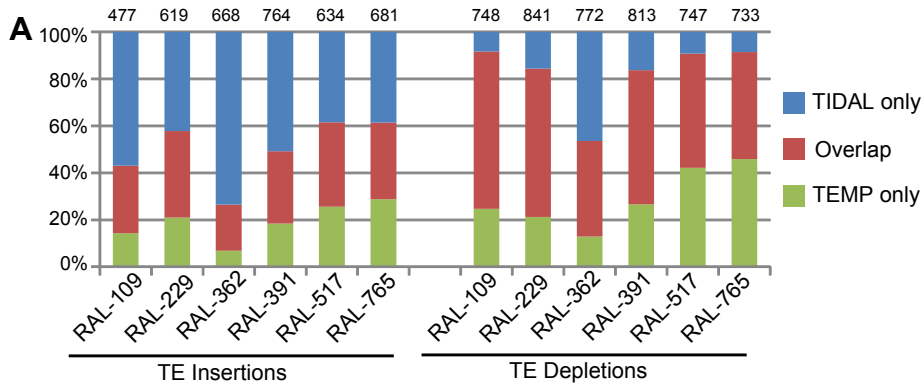

**B**

| Program          | TIDAL-Fly                                                                                                                                                                                                             | TEMP                                                                                                                                                                                        | CnT                                                                                                                                                                                                                                     | LnB                                                                                                                                                            |
|------------------|-----------------------------------------------------------------------------------------------------------------------------------------------------------------------------------------------------------------------|---------------------------------------------------------------------------------------------------------------------------------------------------------------------------------------------|-----------------------------------------------------------------------------------------------------------------------------------------------------------------------------------------------------------------------------------------|----------------------------------------------------------------------------------------------------------------------------------------------------------------|
| Citation         | (Rahman et al, this study)                                                                                                                                                                                            | (Zhuang et al, 2014)                                                                                                                                                                        | (Cridland et al, 2013)                                                                                                                                                                                                                  | (Linheiro and Bergman, 2012)                                                                                                                                   |
| Pipeline summary | Bowtie1 aligner for split reads, Bowtie2 aligner for reference genome reads, and BLAT to enforce TE insertion read calls. Only single-end split reads processed for discordant mappings on both sides of InDel.       | BWA aligner, full tracking of matched paired ends, comparison to reference supporting reads across strains and computes a population frequency.                                             | BWA aligner, full tracking of matched paired ends, reconstruction of candidate InDels, use of BlastN for validation                                                                                                                     | BLAT aligner for split reads, first stage identifies discordant reads, second stage selects only unambiguous reads on both sides of TE insertion.              |
| Distinctions     | Optimization of split short-read approaches to balance sensitivity with specificity. Strain-specific TE landscapes in user-accessible outputs that include rich genomic annotations for Dm6/Rel6 genome release.      | Versatility in application being applied to both <i>Drosophila</i> and human genomes. Strain-specific DGRP InDels genomic locations can be extracted.                                       | Outputs and analyses focused on population genetics studies for <i>Drosophila</i> .                                                                                                                                                     | Identifies specific Target Site Duplication sequences. First split-read pipeline applied to both 454-Roche and Illumina datasets from DGRP fly genomes.        |
| Limitations      | Excludes any TE InDels in major heterochromatin, given high mapping ambiguity. Cannot automatically determine Target Site Duplication sequences. Currently only optimized for <i>Drosophila melanogaster</i> genomes. | Several program-specific predictions in <i>Drosophila</i> , some in heterochromatic regions, that have potential to be artifacts. Libraries with multiple read lengths can trip up program. | Many program-specific predictions, some in heterochromatic regions, that have potential to be artifacts. Outputs only available for libraries meeting read depth cutoff. TE Depletion data at broad population level, not strain level. | Pioneering pipeline sacrificed sensitivity by promoting strong specificity of BLAT algorithm. Only detects TE insertions, no capacity to detect TE depletions. |

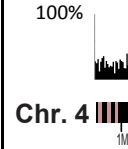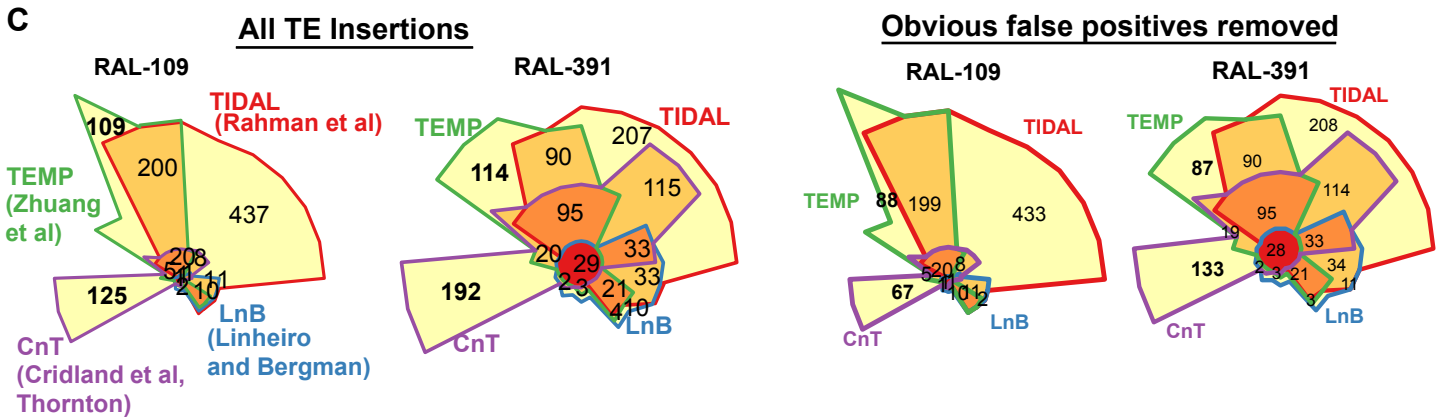

Rahman, et al., Figure S7, Part 1

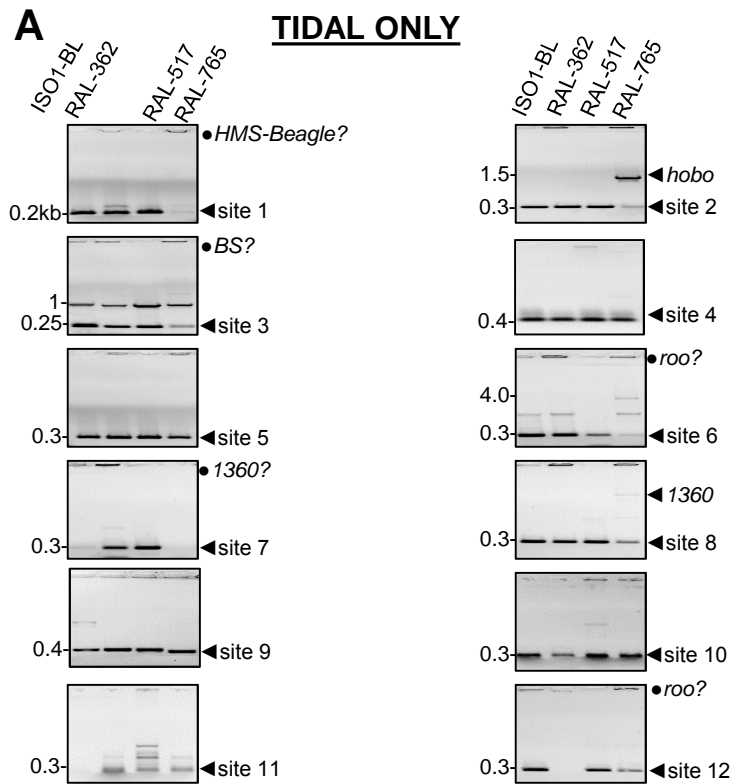

| Site. No. | T.E.       | Locus                   | Coverage Ratio | Size w/o insertion | Size with insertion | PCR evidence |
|-----------|------------|-------------------------|----------------|--------------------|---------------------|--------------|
| 1         | HMS-Beagle | chr2L:8133670:-8133752  | 2.4            | 275                | 7575                | yes          |
| 2         | hobo       | chr2L:19834994-19835061 | 4.7            | 354                | 3354                | yes          |
| 3         | BS         | chr2L:12227998-12228146 | 5.3            | 274                | 5374                | yes          |
| 4         | pogo       | chr2R:12581030-12581105 | 5              | 333                | 2533                | no           |
| 5         | mdg1       | chr2R:7621371-7621430   | 4              | 328                | 7628                | no           |
| 6         | roo        | chr3L:4481564-4481640   | 4.1            | 337                | 9337                | yes          |
| 7         | 1360       | chr3L:18394377-18394445 | 4.2            | 360                | 4760                | yes          |
| 8         | 1360       | chr3R:4885334-4885399   | 1.7            | 354                | 4754                | yes          |
| 9         | jockey     | chr3R:20125023-20125087 | 2.4            | 360                | 5360                | no           |
| 10        | roo        | chr3R:11089486-11089562 | 5.4            | 359                | 9359                | no           |
| 11        | hobo       | chrX:7785488-7785556    | 3.3            | 342                | 3342                | no           |
| 12        | roo        | chrX:15391856-15391929  | 4.1            | 341                | 9341                | yes          |

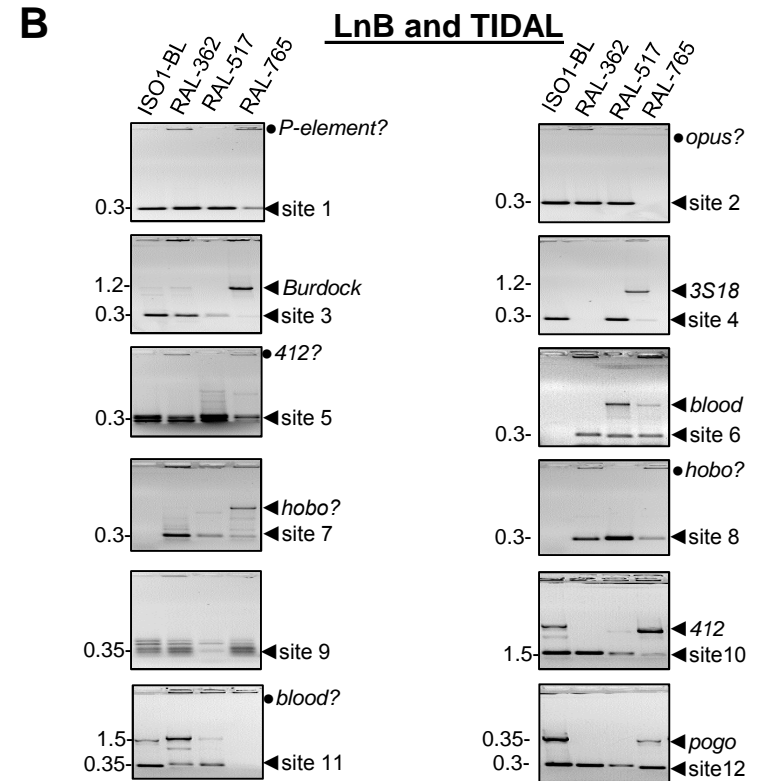

| Site. No. | T.E.      | Locus                   | Coverage Ratio | Size w/o insertion | Size with insertion | PCR evidence |
|-----------|-----------|-------------------------|----------------|--------------------|---------------------|--------------|
| 1         | P-element | chr2L:267478-267547     | 4.4            | 314                | 3214                | yes          |
| 2         | opus      | chr2L:1167146-1167232   | 2.6            | 386                | 8386                | yes          |
| 3         | Burdock   | chr2L:20800099-20800248 | 5.8            | 329                | 6729                | yes          |
| 4         | 3S18      | chr2R:9380884-9380961   | 2.4            | 365                | 6465                | yes          |
| 5         | 412       | chr2R:9442941-9443015   | 3.9            | 331                | 7931                | yes          |
| 6         | blood     | chr2R:11578561-11578638 | 5.6            | 372                | 5672                | yes          |
| 7         | hobo      | chr3L:934796-934851     | 8.3            | 364                | 3364                | yes          |
| 8         | hobo      | chr3L:22566716-22566793 | 4.3            | 367                | 3367                | yes          |
| 9         | Burdock   | chr3R:18968019-18968094 | 3.8            | 375                | 6775                | no           |
| 10        | 412       | chr3R:30626323-30626403 | 5.2            | 379                | 7979                | yes          |
| 11        | blood     | chrX:6487781-6487856    | 4.3            | 375                | 5675                | yes          |
| 12        | pogo      | chrX:21399401-21399469  | 3.6            | 381                | 2581                | yes          |

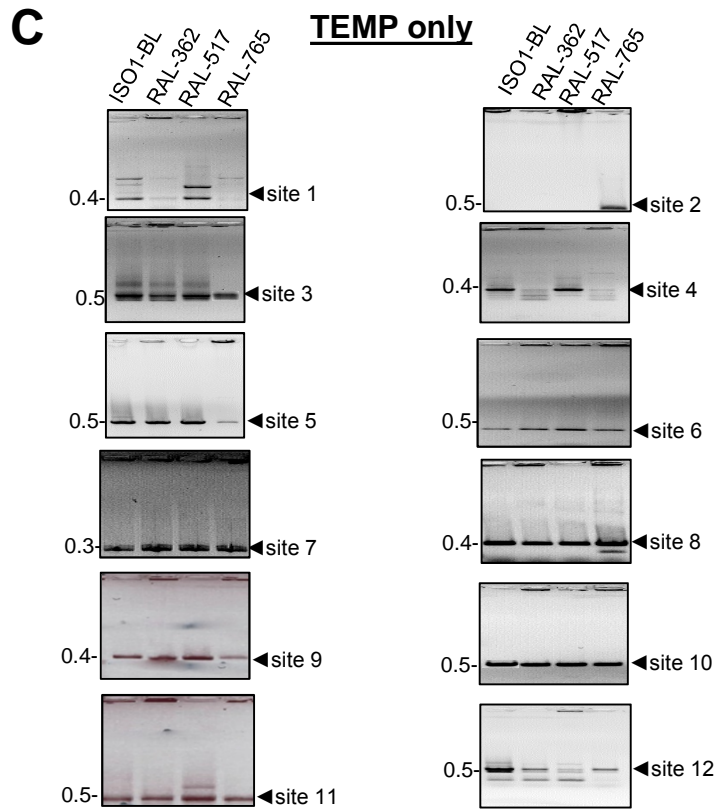

| Site. No. | Locus                 | Amplicon Size | PCR evidence |
|-----------|-----------------------|---------------|--------------|
| 1         | chr2L:9850436-9850443 | 383           | yes          |
| 2         | chr2L:1558495-1558995 | 482           | no           |
| 3         | chr2R:5334166-5334666 | 494           | yes          |
| 4         | chr2R:2095477-2095485 | 405           | no           |
| 5         | chr3L:9571935-9572435 | 482           | yes          |
| 6         | chr3L:5056174-5056674 | 499           | no           |
| 7         | chr3R:5035704-5035739 | 296           | no           |
| 8         | chr3R:1211275-1211285 | 398           | no           |
| 9         | chrX:294866-294869    | 395           | yes          |
| 10        | chrX:5410656-5411156  | 488           | no           |
| 11        | chrY:203747-204247    | 487           | no           |
| 12        | chrY:1565254-1565753  | 645           | no           |

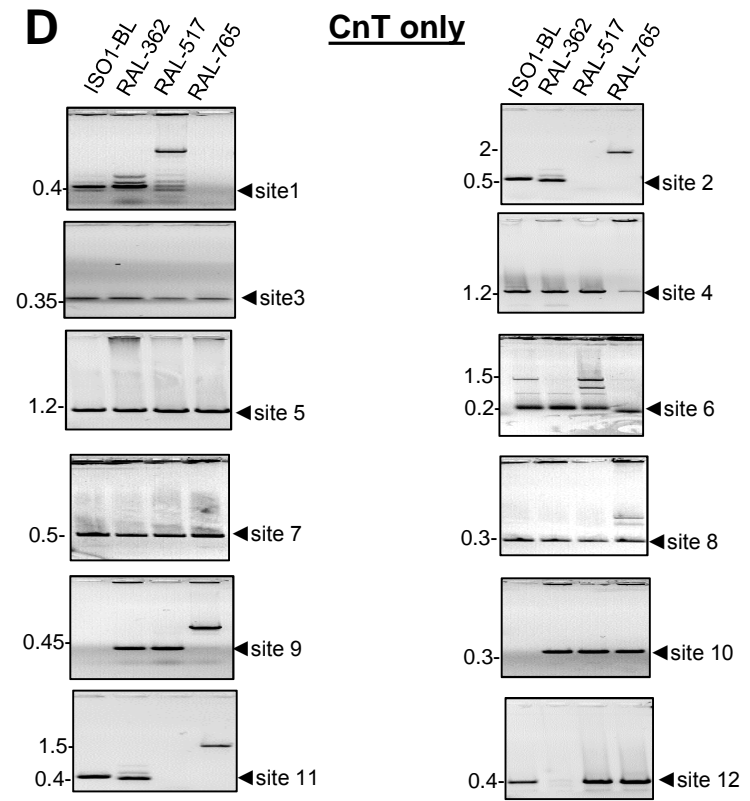

| Site. No. | Locus                   | Amplicon Size* | PCR evidence |
|-----------|-------------------------|----------------|--------------|
| 1         | chrX:4334105-4334327    | 376            | yes          |
| 2         | chrX:14001033-14007159  | 6092           | yes          |
| 3         | chr3R:7696150-7703338   | 7171           | no           |
| 4         | chr3R:14021702-14023463 | 1734           | yes          |
| 5         | chr3L:4361048-4361901   | 844            | no           |
| 6         | chr3L:17180645-17180660 | 394            | no           |
| 7         | chr2R:6948454-6948972   | 493            | no           |
| 8         | chr2R:13064762-13064861 | 357            | yes          |
| 9         | chr2L:1809645-1810122   | 447            | yes          |
| 10        | chr2L:9783398-9783415   | 394            | no           |
| 11        | chr4:180927-183823      | 2892           | yes          |
| 12        | chr4:999517-1001425     | 2008           | no           |

Rahman et al.  
Figure S8.

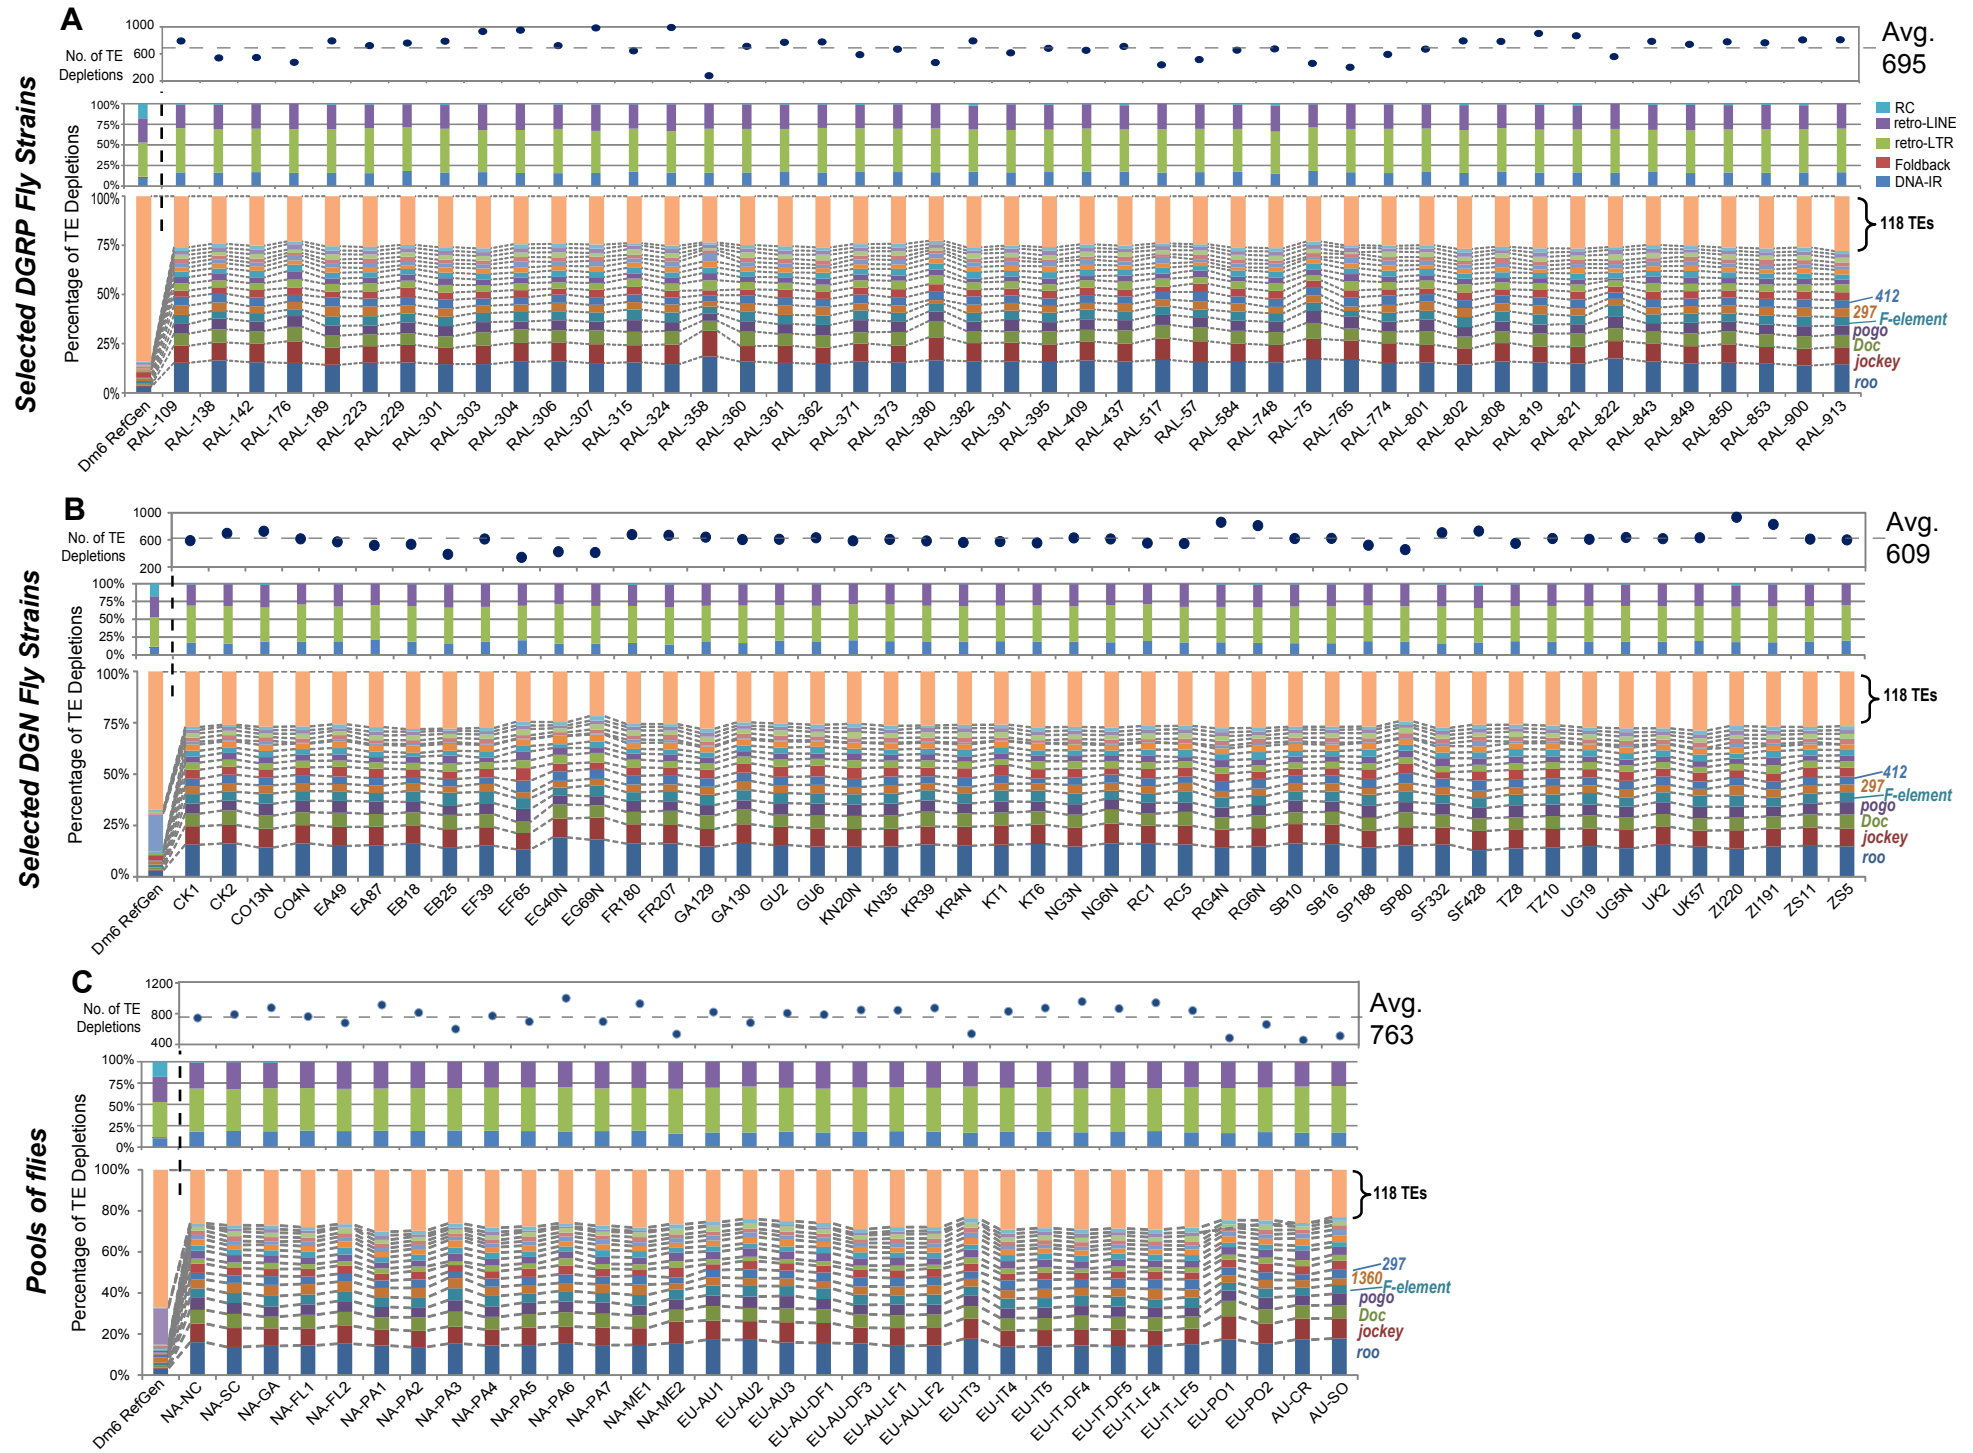

Rahman et al.  
Figure S9.

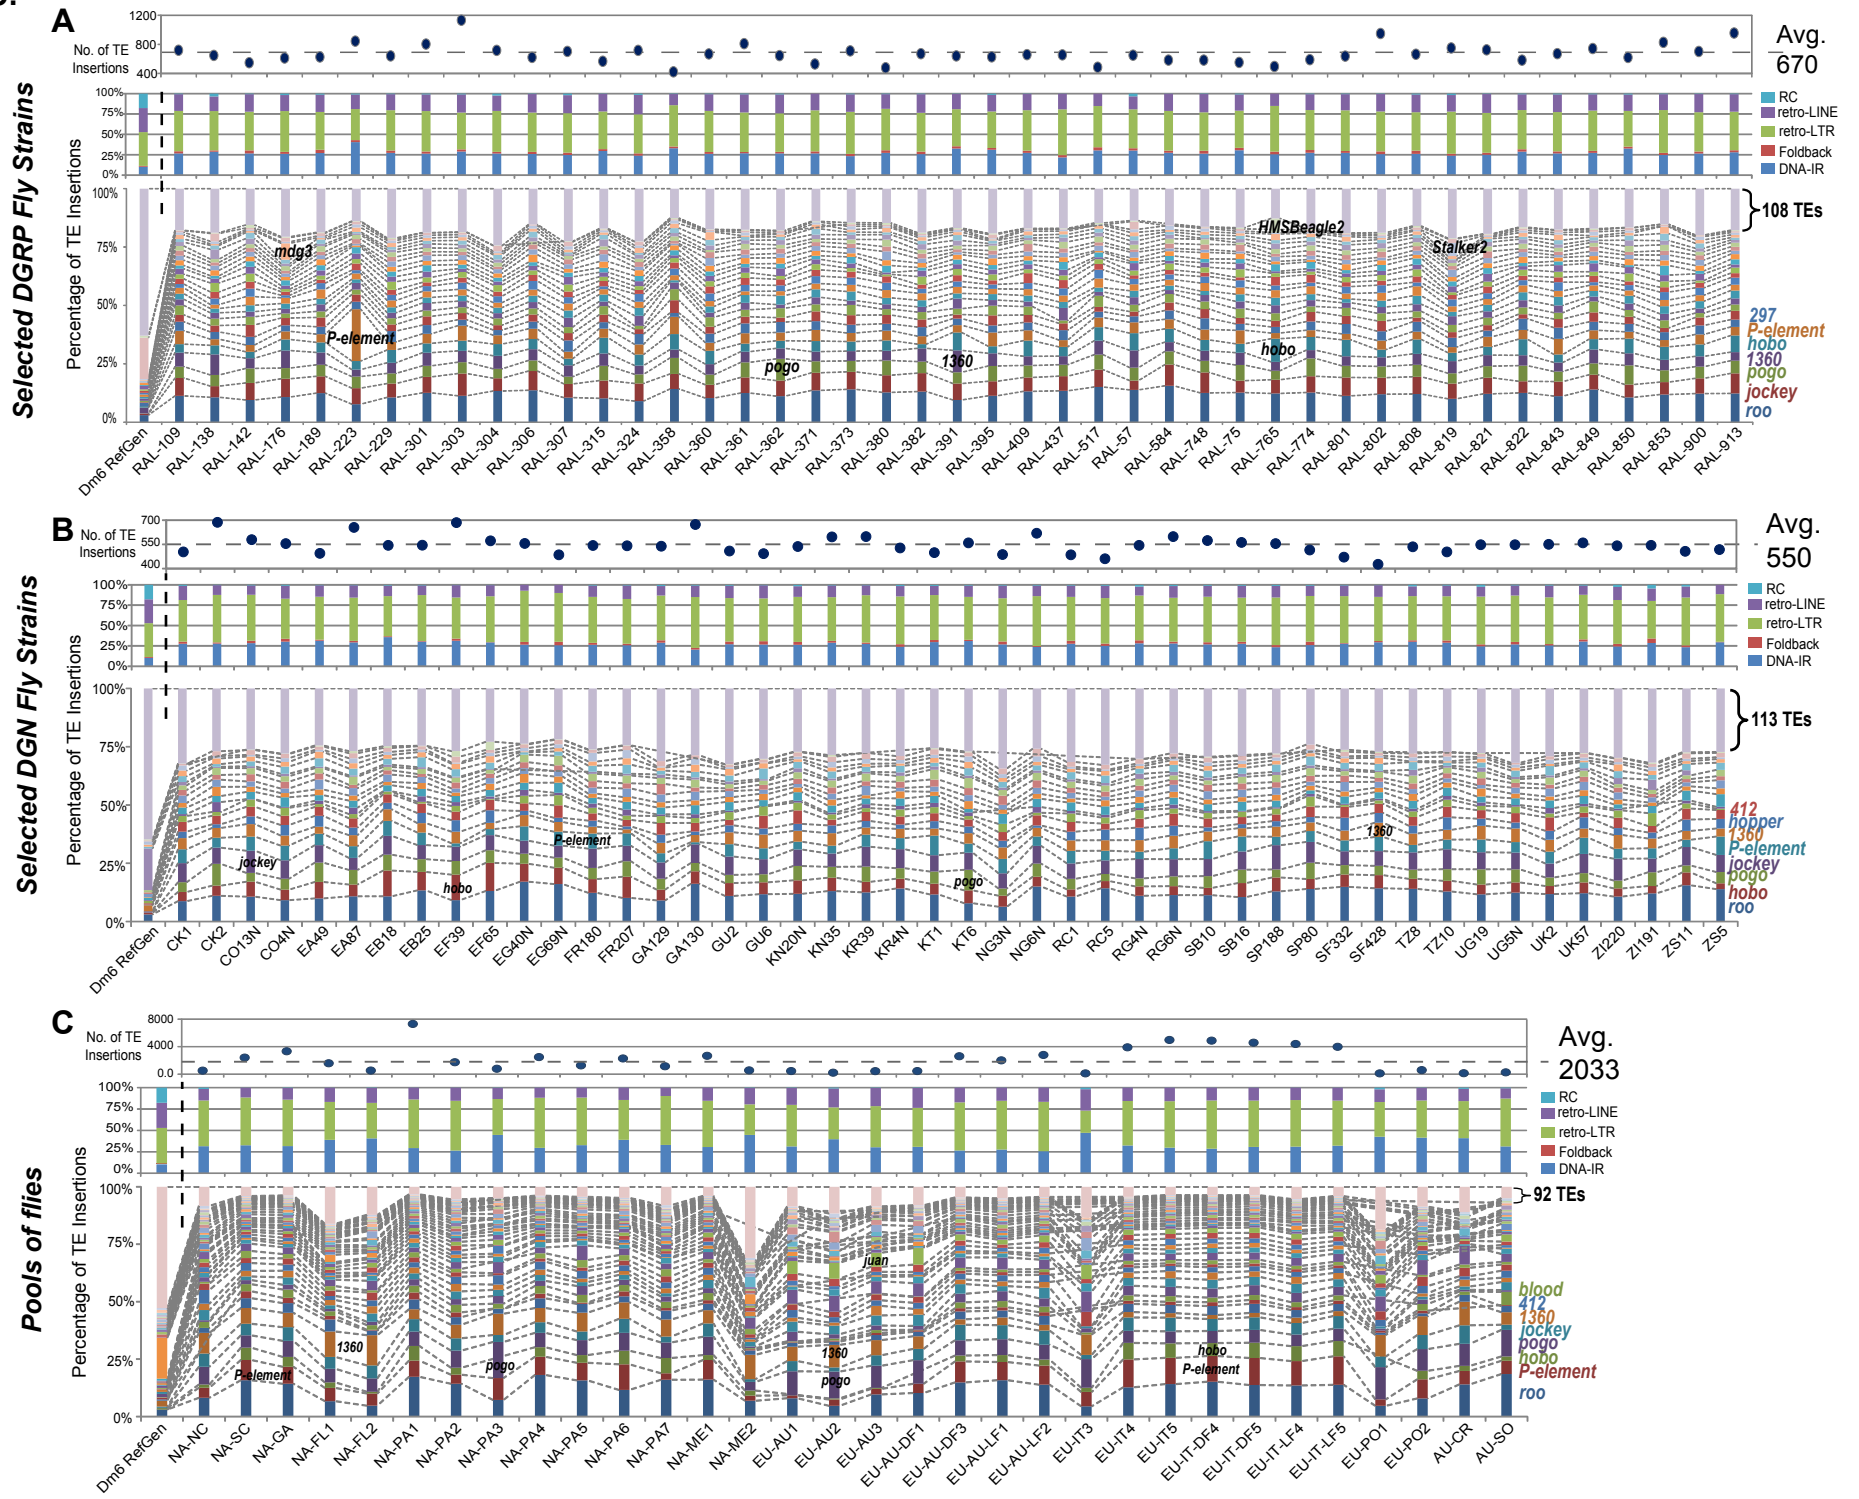



Table S1A. Drosophila Cell Lines in the TIDAL-Fly v1 database

| Number | Official name | Tissue origin    | Origin genotype                                                | modENCODE Name | Library ID* | SRR Accession | Min Library Length | Library Size (M) | Read 1 length | Read 2 length | Latest Ref                       | Other accessions |      |
|--------|---------------|------------------|----------------------------------------------------------------|----------------|-------------|---------------|--------------------|------------------|---------------|---------------|----------------------------------|------------------|------|
| 1      | S2_C1         | Embryo           | Oregon R                                                       | n/a            | S2c1        | SRR1983913    | 150                | 33.8             | 150           | na            | This Study                       |                  |      |
| 2      | S2R+          | Embryo           | Oregon R                                                       | modENCODE_5492 | S2R+        | SRR497719     | 100                | 7.7              | 100           | 100           | Lee et al. Genome Bio 2014       | SRR497722        | 2x75 |
| 3      | S1            | Embryo           | Oregon R                                                       | modENCODE_5491 | S1          | SRR497713     | 75                 | 31.8             | 75            | 75            | Lee et al. Genome Bio 2014       |                  |      |
| 4      | S3            | Embryo           | Oregon R                                                       | modENCODE_5493 | S3          | SRR497721     | 100                | 11.4             | 100           | 100           | Lee et al. Genome Bio 2014       |                  |      |
| 5      | Sg4           | Embryo           | Oregon R                                                       | modENCODE_5494 | Sg4         | SRR497720     | 100                | 20.5             | 100           | 100           | Lee et al. Genome Bio 2014       |                  |      |
| 6      | W2            | Wing disc        | Oregon R                                                       | modENCODE_5495 | W2          | SRR497730     | 75                 | 30.5             | 75            | 75            | Lee et al. Genome Bio 2014       |                  |      |
| 7      | CME W1 Cl.8+  | L3 wing disc     | Oregon R                                                       | modENCODE_5480 | Cl.8        | SRR497726     | 75                 | 18.8             | 75            | 75            | Lee et al. Genome Bio 2014       |                  |      |
| 8      | CME L1        | L3 leg disc      | Oregon R                                                       | modENCODE_5489 | L1          | SRR497712     | 100                | 46.9             | 100           | 100           | Lee et al. Genome Bio 2014       |                  |      |
| 9      | OSS_C         | Ovary            | ?                                                              | n/a            | OSS_C       | SRR1185816    | 150                | 33.7             | 150           | na            | Sytnikova et al. Genome Res 2014 |                  |      |
| 10     | OSS_E         | Ovary            | ?                                                              | n/a            | OSS_E       | SRR1185793    | 150                | 26.6             | 150           | na            | Sytnikova et al. Genome Res 2014 |                  |      |
| 11     | OSC_C         | Ovary            | ?                                                              | n/a            | OSC_C       | SRR609664     | 100                | 65.7             | 100           | na            | Sienski et al. Cell 2013         |                  |      |
| 12     | OSC_E         | Ovary            | ?                                                              | n/a            | OSC_C       | SRR1185771    | 150                | 24.6             | 150           | na            | Sytnikova et al. Genome Res 2014 |                  |      |
| 13     | ML-DmD16-c3   | L3 wing disc     | y <sup>1</sup> v <sup>1</sup> f <sup>1</sup> mal <sup>F1</sup> | modENCODE_5482 | D16-c3      | SRR497710     | 100                | 36.6             | 100           | 100           | Lee et al. Genome Bio 2014       | SRR497715        | 2x75 |
| 14     | ML-DmD17-c3   | L3 haltere disc  | y <sup>1</sup> v <sup>1</sup> f <sup>1</sup> mal <sup>F1</sup> | modENCODE_5483 | D17-c3      | SRR497725     | 100                | 43.4             | 100           | 100           | Lee et al. Genome Bio 2014       |                  |      |
| 15     | ML-DmD20-c2   | L3 antennal disc | y <sup>1</sup> v <sup>1</sup> f <sup>1</sup> mal <sup>F1</sup> | modENCODE_5484 | D20-c2      | SRR497724     | 75                 | 26.7             | 75            | 75            | Lee et al. Genome Bio 2014       |                  |      |
| 16     | ML-DmD20-c5   | L3 antennal disc | y <sup>1</sup> v <sup>1</sup> f <sup>1</sup> mal <sup>F1</sup> | modENCODE_5490 | D20-c5      | SRR497723     | 100                | 12.5             | 100           | 100           | Lee et al. Genome Bio 2014       | SRR497718        | 2x75 |
| 17     | ML-DmD4-c1    | L3 mixed discs   | y <sup>1</sup> v <sup>1</sup> f <sup>1</sup> mal <sup>F1</sup> | modENCODE_5486 | D4-c1       | SRR497716     | 75                 | 36.5             | 75            | 75            | Lee et al. Genome Bio 2014       |                  |      |
| 18     | ML-DmD8       | L3 wing disc     | y <sup>1</sup> v <sup>1</sup> f <sup>1</sup> mal <sup>F1</sup> | modENCODE_5487 | D8          | SRR497729     | 75                 | 29.4             | 75            | 75            | Lee et al. Genome Bio 2014       |                  |      |
| 19     | ML-DmD9       | L3 wing disc     | y <sup>1</sup> v <sup>1</sup> f <sup>1</sup> mal <sup>F1</sup> | modENCODE_5488 | D9          | SRR497711     | 100                | 30.2             | 100           | 100           | Lee et al. Genome Bio 2014       | SRR497714        | 2x75 |
| 20     | 1182-4H       | Embryo           | mh                                                             | modENCODE_5479 | 1182-4H     | SRR497717     | 100                | 21.1             | 100           | 100           | Lee et al. Genome Bio 2014       |                  |      |
| 21     | Mbn2          | L3 hemocytes     | l(2)mbn                                                        | modENCODE_5496 | Mbn2        | SRR497728     | 75                 | 18.3             | 75            | 75            | Lee et al. Genome Bio 2014       |                  |      |

Table S1B. Drosophila Lab Strains in the TIDAL-Fly v1 database

| Number | Stock ID*             | Stock Location                                    | Genome Type                   | Library ID*    | SRA Accession                                                    | Min Read Length | PE Reads (M)                     | Read Length 1 | Read Length 2 | Data Group                             |
|--------|-----------------------|---------------------------------------------------|-------------------------------|----------------|------------------------------------------------------------------|-----------------|----------------------------------|---------------|---------------|----------------------------------------|
| 1      | Oregon R              | Terry Orr-Weaver                                  | OregonR adult mix male female | OreR-TO1       | SRR1538752                                                       | 125             | 8.6                              | 125           | 125           | ModEncode                              |
| 2      | Oregon R              | Terry Orr-Weaver                                  | OregonR adult mix male female | OreR-TO2       | SRR1538753                                                       | 85              | 36.1                             | 85            | 85            | ModEncode                              |
| 3      | Oregon R              | Sarah Elgin                                       | OregonR adult mix male female | OreR-SE        | SRR1538754                                                       | 125             | 27.7                             | 125           | 125           | ModEncode                              |
| 4      | Oregon R              | Peter Cherbas                                     | OregonR adult mix male female | OreR-PB1       | SRR1538751                                                       | 85              | 38                               | 125           | 85            | ModEncode                              |
| 5      | Oregon R              | Peter Cherbas                                     | OregonR adult mix male female | OreR-PB2       | SRR1538755                                                       | 125             | 9.9                              | 125           | 125           | ModEncode                              |
| 6      | Oregon R              | modENCODE_5497_Brent Graveley                     | OregonR adult virgin female   | OreR-BG        | SRR497727                                                        | 75              | 19.9                             | 75            | 75            | ModEncode                              |
| 7      | Oregon-R              | Dworkin lab                                       | OregonR adult mix male female | OreR-Dw1       | SRR1104304, SRR1104305                                           | 75              | 16.7,18                          | 75            | 75            | Dworkin Lab, Genetics paper            |
| 8      | DarkFly               | Fuse lab                                          | OregonR-S mix                 | OreR-Dark      | DRR001446                                                        | 48              | 44.5                             | 48            | 48            | Izutsu Fuse PlosONE paper              |
| 9      | Samarkand             | Dworkin lab                                       | Samarkand adult mix           | Samar-Dw1      | SRR1104160, SRR1104161                                           | 75              | 12.9                             | 75            | 75            | Dworkin Lab, Genetics paper            |
| 10     | Canton-S substrain JC | Brembs lab, Julien Colomb from Tomas Preat        | 20 adult females              | CanS-JC        | ERR744541, ERR744542, ERR744543, ERR744544                       | 100             | 8.8, 8.7, 8.7, 8.7               | 100           | 100           | Brembs Lab, F1000 paper and this study |
| 11     | Canton-S substrain BS | Brembs lab, Bruno Swinderen from Ralf Greenspan   | 20 adult females              | CanS-BS        | ERR744549, ERR744550, ERR744551, ERR744552                       | 100             | 7.1, 7.1, 7.2, 7.2               | 100           | 100           | Brembs Lab, F1000 paper and this study |
| 12     | Canton-S substrain HS | Brembs lab, Henrike Scholz from Ulrike Herberlein | 20 adult females              | CanS-HS        | ERR744545, ERR744546, ERR744547, ERR744548                       | 100             | 10.3, 10.2, 10.3, 10.2           | 100           | 100           | Brembs Lab, F1000 paper and this study |
| 13     | Canton-S substrain TP | Brembs lab, Tim Tully lab, Brandeis               | 20 adult females              | CanS-TP        | ERR744537, ERR744538, ERR744539, ERR744540                       | 100             | 9.4, 9.4, 9.5, 9.6               | 100           | 100           | Brembs Lab, F1000 paper and this study |
| 14     | Canton-S substrain TZ | Brembs lab, Troy Zars from Martin Heisenberg      | 20 adult females              | CanS-TZ        | ERR744533, ERR744534, ERR744535, ERR744536                       | 100             | 10.2, 10.1, 10.0, 10.0           | 100           | 100           | Brembs Lab, F1000 paper and this study |
| 15     | CanS-SH               | Stowers Institute, Scott Hawley lab               | Adult mix, iso-2,3,X          | CanS-SH        | SRR2044310                                                       | 150             | 25.5                             | 150           | 150           | Public deposit                         |
| 16     | w[1118]               | Stowers Institute, Scott Hawley lab               | Adult mix, iso-2,3,X          | w_1118         | SRR2044312                                                       | 150             | 27.2                             | 150           | 150           | Public deposit                         |
| 17     | ISO1 - BL             | Bergman lab, ISO1 from Bloomington                | 10 adult males                | ISO1-BL        | ERR701706, ERR701707, ERR701708, ERR701709, ERR701710, ERR701711 | 100             | 15, 14.9, 14.9, 15.1, 14.8, 15.0 | 100           | 100           | Gutzwiller et al, ArXiv                |
| 18     | ISO1-CL1              | Langley lab ISO1, mixed adults                    | mixed adult                   | ISO1-CL1       | SRR350908                                                        | 75              | 21.8                             | 100           | 100           | Langley et al (Begun), Genetics 2012   |
| 19     | ISO1-CL-HEm3          | Langley lab ISO1, haploid embryos                 | haploid embryos               | ISO1-CL-HEm3   | SRR306608                                                        | 100             | 16.4                             | 100           | 100           | Langley et al (Begun), Genetics 2012   |
| 20     | ISO1-CL-HEm12         | Langley lab ISO1, haploid embryos                 | haploid embryos               | ISO1-CL-HEm12  | SRR097732, SRR306607                                             | 75              | 24.2, 19.7                       | 75            | 75            | Langley et al (Begun), Genetics 2012   |
| 21     | ISO1-AS-Ova           | Spradling lab ISO1, Ovaries                       | females                       | ISO1-AS-Ova    | SRR1519054                                                       | 100             | 71.5                             | 100           | 100           | Yarosh and Spradline, GenesDev 2014    |
| 22     | ISO1-AS-Emb123        | Spradling lab, ISO1 embryos                       | 0-18hr embryos                | ISO1-AS-Emb123 | SRR1516224                                                       | 100             | 81.8, 69.1, 50.5                 | 100           | 100           | Yarosh and Spradline, GenesDev 2014    |
| 23     | ISO1-AS-LSg123        | Spradling lab ISO1, L3 Salivary gland             | L3 instar                     | ISO1-AS-LSg123 | SRR1516221, SRR1516223, SRR1516225                               | 100             | 62.9, 88.4, 68.6                 | 100           | 100           | Yarosh and Spradline, GenesDev 2014    |
| 24     | OreR-AS-FC            | Spradling lab OreR, stq10-14 follicle cells       | females                       | OreR-AS-FC     | SRR1519051                                                       | 100             | 43.1                             | 100           | 100           | Yarosh and Spradline, GenesDev 2014    |

Table S1C. Drosophila Lab Strains in the TIDAL-Fly v1 database

Genomes previously examined in McKay et al, Nature 2012, and Huang et al, Genome Res, 2014

PHASE 1: First Set of Libraries Analyzed for the paper. The remaining libraries in Phase 2 below are also listed in the TIDAL-Fly database

| Library | Stock ID* | Stock Location    | Genome Type         | SRA Accession | Library ID*  | SRA Accession | Min Read Length | Read Length 1          | Read Length 2 | Data Group   | Reads (M) | Raw Read Length:Read Number                                  | Freeze       | Bloomington Stock | Synonym       | NCBI SRA      | Reads | Mapped Reads | Mapped Coverage | Strains |
|---------|-----------|-------------------|---------------------|---------------|--------------|---------------|-----------------|------------------------|---------------|--------------|-----------|--------------------------------------------------------------|--------------|-------------------|---------------|---------------|-------|--------------|-----------------|---------|
| 1       | DGRP_362  | Bloomington-25187 | inbred line, mix of | SRX006288     | RAL-362      | SRR846985     | 125             | merged, use min length | 125.0         | DGRP-F1 + F2 | 56.3      | 45bp:18900352, 75bp:19241828, 125bp:19241828, 125bp:19241828 | DGRP-F1 + F2 | Blo               | 25187 RAL-362 | SRX006288 and | 70.4  | 70,371,466   | 39.4            | 1       |
| 2       | DGRP_517  | Bloomington-25197 | inbred line, mix of | SRX024363     | RAL-517      | SRR933579     | 75              | merged, use min length | 75.0          | DGRP-F1      | 59.8      | 45bp:75005702, 75bp:44531158                                 | DGRP-F1      | Blo               | 25197 RAL-517 | SRX024363 and | 115.8 | 115,773,424  | 37              | 2       |
| 3       | DGRP_765  | Bloomington-25204 | inbred line, mix of | SRX006169     | RAL-765      | SRR933595     | 75              | 75.0                   | 75.0          | DGRP-F1      | 19.7      | 75bp:39893442                                                | DGRP-F1      | Blo               | 25204 RAL-765 | SRX006169 and | 38.1  | 38,107,800   | 16.3            | 3       |
| 4       | DGRP_109  | Bloomington-28140 | inbred line, mix of | SRX020246     | RAL-109_75b  | SRR835219     | 75              | merged, use min length | 125.0         | DGRP-F1      | 44.8      | 75bp:28899572, 125bp:60695744                                | DGRP-F1      | Blo               | 28140 RAL-109 | SRX020246 and | 78.6  | 78,598,946   | 48.7            | 4       |
| 5       | DGRP_109  | Bloomington-28140 | inbred line, mix of | SRX020246     | RAL-109_125b | SRR835219     | 125             | merged, use min length | 125.0         | DGRP-F1      | 44.8      | 75bp:28899572, 125bp:60695744                                | DGRP-F1      | Blo               | 28140 RAL-109 | SRX020246 and | 78.6  | 78,598,946   | 48.7            | 4       |
| 6       | DGRP_229  | Bloomington-29653 | inbred line, mix of | SRX021052     | RAL-229_75b  | SRR835221     | 75              | merged, use min length | 125.0         | DGRP-F1      | 49.6      | 75bp:27785294, 125bp:71504164                                | DGRP-F1      | Blo               | 29653 RAL-229 | SRX021052 and | 83.9  | 83,937,442   | 52.7            | 5       |
| 7       | DGRP_229  | Bloomington-29653 | inbred line, mix of | SRX021052     | RAL-229_125b | SRR835221     | 125             | merged, use min length | 125.0         | DGRP-F1      | 49.6      | 75bp:27785294, 125bp:71504164                                | DGRP-F1      | Blo               | 29653 RAL-229 | SRX021052 and | 83.9  | 83,937,442   | 52.7            | 5       |
| 8       | DGRP_301  | Bloomington-25175 | inbred line, mix of | SRX005978     | RAL-301_75b  | SRR835223     | 75              | merged, use min length | 125.0         | DGRP-F2      | 73.6      | 45bp:13099368, 64bp:10588312, 75bp:45373906                  | DGRP-F2      | Blo               | 25175 RAL-301 | SRX155995 and | 133.5 | 133,504,636  | 71.7            | 6       |
| 9       | DGRP_301  | Bloomington-25175 | inbred line, mix of | SRX005978     | RAL-301_125b | SRR835223     | 125             | merged, use min length | 125.0         | DGRP-F2      | 73.6      | 45bp:13099368, 64bp:10588312, 75bp:45373906                  | DGRP-F2      | Blo               | 25175 RAL-301 | SRX155995 and | 133.5 | 133,504,636  | 71.7            | 6       |
| 10      | DGRP_303  | Bloomington-25176 | inbred line, mix of | SRX005986     | RAL-303_100b | SRR835228     | 100             | merged, use min length | 100.0         | DGRP-F2      | 161.6     | 45bp:79536584, 64bp:4167822, 100bp:4167822, 100bp:4167822    | DGRP-F2      | Blo               | 25176 RAL-303 | SRX155978 and | 287.4 | 287,358,990  | 148             | 7       |
| 11      | DGRP_303  | Bloomington-25176 | inbred line, mix of | SRX005986     | RAL-303_125b | SRR835228     | 125             | merged, use min length | 100.0         | DGRP-F2      | 161.6     | 45bp:79536584, 64bp:4167822, 100bp:4167822, 100bp:4167822    | DGRP-F2      | Blo               | 25176 RAL-303 | SRX155978 and | 287.4 | 287,358,990  | 148             | 7       |
| 12      | DGRP_304  | Bloomington-25177 | inbred line, mix of | SRX005988     | RAL-304_75b  | SRR835236     | 75              | merged, use min length | 100.0         | DGRP-F2      | 142.5     | 45bp:25081192, 64bp:7071260, 75bp:45373906                   | DGRP-F2      | Blo               | 25177 RAL-304 | SRX156009 and | 252.1 | 252,108,056  | 133.6           | 8       |
| 13      | DGRP_304  | Bloomington-25177 | inbred line, mix of | SRX005988     | RAL-304_100b | SRR835236     | 100             | merged, use min length | 100.0         | DGRP-F2      | 142.5     | 45bp:25081192, 64bp:7071260, 75bp:45373906                   | DGRP-F2      | Blo               | 25177 RAL-304 | SRX156009 and | 252.1 | 252,108,056  | 133.6           | 8       |
| 14      | DGRP_304  | Bloomington-25177 | inbred line, mix of | SRX005988     | RAL-304_125b | SRR835236     | 125             | merged, use min length | 100.0         | DGRP-F2      | 142.5     | 45bp:25081192, 64bp:7071260, 75bp:45373906                   | DGRP-F2      | Blo               | 25177 RAL-304 | SRX156009 and | 252.1 | 252,108,056  | 133.6           | 8       |
| 15      | DGRP_306  | Bloomington-37525 | inbred line, mix of | SRX006140     | RAL-306_75b  | SRR835242     | 75              | merged, use min length | 125.0         | DGRP-F2      | 63.2      | 45bp:29368112, 64bp:8510324, 75bp:45373906                   | DGRP-F2      | Blo               | 37525 RAL-306 | SRX156007 and | 100.4 | 100,446,332  | 50.7            | 9       |
| 16      | DGRP_306  | Bloomington-37525 | inbred line, mix of | SRX006140     | RAL-306_125b | SRR835242     | 125             | merged, use min length | 125.0         | DGRP-F2      | 63.2      | 45bp:29368112, 64bp:8510324, 75bp:45373906                   | DGRP-F2      | Blo               | 37525 RAL-306 | SRX156007 and | 100.4 | 100,446,332  | 50.7            | 9       |
| 17      | DGRP_307  | Bloomington-25179 | inbred line, mix of | SRX006186     | RAL-307_75b  | SRR835247     | 75              | merged, use min length | 75.0          | DGRP-F2      | 144.8     | 36bp:9641364, 45bp:17304248, 75bp:45373906                   | DGRP-F2      | Blo               | 25179 RAL-307 | SRX156012 and | 252.2 | 252,236,309  | 142.1           | 10      |
| 18      | DGRP_307  | Bloomington-25179 | inbred line, mix of | SRX006186     | RAL-307_100b | SRR835247     | 100             | merged, use min length | 100.0         | DGRP-F2      | 144.8     | 36bp:9641364, 45bp:17304248, 75bp:45373906                   | DGRP-F2      | Blo               | 25179 RAL-307 | SRX156012 and | 252.2 | 252,236,309  | 142.1           | 10      |
| 19      | DGRP_307  | Bloomington-25179 | inbred line, mix of | SRX006186     | RAL-307_125b | SRR835247     | 125             | merged, use min length | 125.0         | DGRP-F2      | 144.8     | 36bp:9641364, 45bp:17304248, 75bp:45373906                   | DGRP-F2      | Blo               | 25179 RAL-307 | SRX156012 and | 252.2 | 252,236,309  | 142.1           | 10      |
| 20      | DGRP_315  | Bloomington-25181 | inbred line, mix of | SRX006143     | RAL-315_75b  | SRR835252     | 75              | merged, use min length | 125.0         | DGRP-F2      | 63.1      | 45bp:48481060, 75bp:20407822, 85bp:48481060                  | DGRP-F2      | Blo               | 25181 RAL-315 | SRX156010 and | 114.4 | 114,404,766  | 51              | 11      |
| 21      | DGRP_315  | Bloomington-25181 | inbred line, mix of | SRX006143     | RAL-315_125b | SRR835252     | 125             | merged, use min length | 125.0         | DGRP-F2      | 63.1      | 45bp:48481060, 75bp:20407822, 85bp:48481060                  | DGRP-F2      | Blo               | 25181 RAL-315 | SRX156010 and | 114.4 | 114,404,766  | 51              | 11      |
| 22      | DGRP_340  | Bloomington-28174 | inbred line, mix of | SRX156030     | RAL-340_100b | SRR835939     | 100             | merged, use min length | 100.0         | DGRP-F2      | 103.7     | 75bp:41788984, 100bp:165697712                               | DGRP-F2      | Blo               | 28174 RAL-340 | SRX156030     | 130.2 | 130,158,488  | 73.8            | 12      |
| 23      | DGRP_371  | Bloomington-28183 | inbred line, mix of | SRX021257     | RAL-371_75b  | SRR835326     | 75              | merged, use min length | 125.0         | DGRP-F1 + F2 | 42.6      | 75bp:30869276, 125bp:27187181                                | DGRP-F1 + F2 | Blo               | 28183 RAL-371 | SRX021257 and | 78.6  | 78,638,404   | 42.5            | 13      |
| 24      | DGRP_371  | Bloomington-28183 | inbred line, mix of | SRX021257     | RAL-371_125b | SRR835326     | 125             | merged, use min length | 125.0         | DGRP-F1 + F2 | 42.6      | 75bp:30869276, 125bp:27187181                                | DGRP-F1 + F2 | Blo               | 28183 RAL-371 | SRX021257 and | 78.6  | 78,638,404   | 42.5            | 13      |
| 25      | DGRP_373  | Bloomington-28184 | inbred line, mix of | SRX023425     | RAL-373_95b  | SRR835329     | 95              | merged, use min length | 125.0         | DGRP-F1      | 42.8      | 95bp:40216244, 125bp:45373906                                | DGRP-F1      | Blo               | 28184 RAL-373 | SRX023425 and | 76.7  | 76,690,462   | 48.3            | 14      |
| 26      | DGRP_373  | Bloomington-28184 | inbred line, mix of | SRX023425     | RAL-373_125b | SRR835329     | 125             | merged, use min length | 125.0         | DGRP-F1      | 42.8      | 95bp:40216244, 125bp:45373906                                | DGRP-F1      | Blo               | 28184 RAL-373 | SRX023425 and | 76.7  | 76,690,462   | 48.3            | 14      |
| 27      | DGRP_409  | Bloomington-28278 | inbred line, mix of | SRX021243     | RAL-409_95b  | SRR835331     | 95              | merged, use min length | 125.0         | DGRP-F1      | 38.7      | 95bp:3305170, 125bp:44122246                                 | DGRP-F1      | Blo               | 28278 RAL-409 | SRX021243 and | 55.1  | 55,099,676   | 35.7            | 15      |
| 28      | DGRP_409  | Bloomington-28278 | inbred line, mix of | SRX021243     | RAL-409_125b | SRR835331     | 125             | merged, use min length | 125.0         | DGRP-F1      | 38.7      | 95bp:3305170, 125bp:44122246                                 | DGRP-F1      | Blo               | 28278 RAL-409 | SRX021243 and | 55.1  | 55,099,676   | 35.7            | 15      |
| 29      | DGRP_584  | Bloomington-28212 | inbred line, mix of | SRX155987     | RAL-584_95b  | SRR835942     | 95              | merged, use min length | 125.0         | DGRP-F2      | 70        | 95bp:93885100, 125bp:46038390                                | DGRP-F2      | Blo               | 28212 RAL-584 | SRX155987 and | 79.7  | 79,663,962   | 49.4            | 16      |
| 30      | DGRP_584  | Bloomington-28212 | inbred line, mix of | SRX155987     | RAL-584_125b | SRR835942     | 125             | merged, use min length | 125.0         | DGRP-F2      | 70        | 95bp:93885100, 125bp:46038390                                | DGRP-F2      | Blo               | 28212 RAL-584 | SRX155987 and | 79.7  | 79,663,962   | 49.4            | 16      |
| 31      | DGRP_748  | Bloomington-28224 | inbred line, mix of | SRX156019     | RAL-748_95b  | SRR835336     | 95              | merged, use min length | 125.0         | DGRP-F2      | 43.7      | 95bp:36957084, 125bp:50455402                                | DGRP-F2      | Blo               | 28224 RAL-748 | SRX156019 and | 57.4  | 57,410,828   | 38.3            | 17      |
| 32      | DGRP_748  | Bloomington-28224 | inbred line, mix of | SRX156019     | RAL-748_125b | SRR835336     | 125             | merged, use min length | 125.0         | DGRP-F2      | 43.7      | 95bp:36957084, 125bp:50455402                                | DGRP-F2      | Blo               | 28224 RAL-748 | SRX156019 and | 57.4  | 57,410,828   | 38.3            | 17      |
| 33      | DGRP_801  | Bloomington-28234 | inbred line, mix of | SRX021391     | RAL-801_95b  | SRR835341     | 95              | merged, use min length | 125.0         | DGRP-F1      | 43.9      | 95bp:32922146, 125bp:53899816                                | DGRP-F1      | Blo               | 28234 RAL-801 | SRX021391 and | 59.2  | 59,280,892   | 38.4            | 18      |
| 34      | DGRP_801  | Bloomington-28234 | inbred line, mix of | SRX021391     | RAL-801_125b | SRR835341     | 125             | merged, use min length | 125.0         | DGRP-F1      | 43.9      | 95bp:32922146, 125bp:53899816                                | DGRP-F1      | Blo               | 28234 RAL-801 | SRX021391 and | 59.2  | 59,280,892   | 38.4            | 18      |
| 35      | DGRP_802  | Bloomington-28235 | inbred line, mix of | SRX025318     | RAL-802_95b  | SRR835343     | 95              | merged, use min length | 125.0         | DGRP-F1      | 47.1      | 95bp:27114342, 125bp:67142296                                | DGRP-F1      | Blo               | 28235 RAL-802 | SRX025318 and | 78.6  | 78,579,930   | 52.4            | 19      |
| 36      | DGRP_802  | Bloomington-28235 | inbred line, mix of | SRX025318     | RAL-802_125b | SRR835343     | 125             | merged, use min length | 125.0         | DGRP-F1      | 47.1      | 95bp:27114342, 125bp:67142296                                | DGRP-F1      | Blo               | 28235 RAL-802 | SRX025318 and | 78.6  | 78,579,930   | 52.4            | 19      |
| 37      | DGRP_808  | Bloomington-28238 | inbred line, mix of | SRX021402     | RAL-808_75b  | SRR835345     | 75              | merged, use min length | 125.0         | DGRP-F1      | 53.8      | 75bp:44482188, 125bp:63083538                                | DGRP-F1      | Blo               | 28238 RAL-808 | SRX021402 and | 83.0  | 82,954,992   | 49.3            | 20      |
| 38      | DGRP_808  | Bloomington-28238 | inbred line, mix of | SRX021402     | RAL-808_125b | SRR835345     | 125             | merged, use min length | 125.0         | DGRP-F1      | 53.8      | 75bp:44482188, 125bp:63083538                                | DGRP-F1      | Blo               | 28238 RAL-808 | SRX021402 and | 83.0  | 82,954,992   | 49.3            | 20      |
| 39      | DGRP_821  | Bloomington-28243 | inbred line, mix of | SRX155991     | RAL-821_100b | SRR835347     | 100             | merged, use min length | 100.0         | DGRP-F2      | 108.2     | 100bp:132570414, 125bp:83747778                              | DGRP-F2      | Blo               | 28243 RAL-821 | SRX155990 and | 179.3 | 179,277,520  | 112             | 21      |
| 40      | DGRP_821  | Bloomington-28243 | inbred line, mix of | SRX155991     | RAL-821_125b | SRR835347     | 125             | merged, use min length | 100.0         | DGRP-F2      | 108.2     | 100bp:132570414, 125bp:83747778                              | DGRP-F2      | Blo               | 28243 RAL-821 | SRX155990 and | 179.3 | 179,277,520  | 112             | 21      |
| 41      | DGRP_853  | Bloomington-28250 | inbred line, mix of | SRX021491     | RAL-853_110b | SRR835349     | 110             | merged, use min length | 125.0         | DGRP-F2      | 55.3      | 110bp:42021476, 125bp:68611046                               | DGRP-F2      | Blo               | 28250 RAL-853 | SRX021491 and | 69.8  | 69,801,922   | 48.9            | 22      |
| 42      | DGRP_853  | Bloomington-28250 | inbred line, mix of | SRX021491     | RAL-853_125b | SRR835349     | 125             | merged, use min length | 125.0         | DGRP-F2      | 55.3      | 110bp:42021476, 125bp:68611046                               | DGRP-F2      | Blo               | 28250 RAL-853 | SRX021491 and | 69.8  | 69,801,922   | 48.9            | 22      |
| 43      | DGRP_900  | Bloomington-28261 | inbred line, mix of | SRX156023     | RAL-900_95b  | SRR846989     | 95              | merged, use min length | 125.0         | DGRP-F2      | 47.6      | 95bp:30160598, 125bp:65136580                                | DGRP-F2      | Blo               | 28261 RAL-900 | SRX156023     | 77.4  | 77,355,512   | 52.3            | 23      |
| 44      | DGRP_900  | Bloomington-28261 | inbred line, mix of | SRX156023     | RAL-900_125b | SRR846989     | 125             | merged, use min length | 125.0         | DGRP-F2      | 47.6      | 95bp:30                                                      |              |                   |               |               |       |              |                 |         |

|    |          |                   |                     |               |             |               |      |                        |       |              |           |                                           |            |     |       |         |               |       |             |      |    |
|----|----------|-------------------|---------------------|---------------|-------------|---------------|------|------------------------|-------|--------------|-----------|-------------------------------------------|------------|-----|-------|---------|---------------|-------|-------------|------|----|
| 69 | DGRP_358 | Bloomington-25185 | inbred line, mix of | SRX006282, SR | RAL-358     | SRR018574, SR | 75.0 | merged, use min length | 75.0  | DGRP-F1      | 6.8, 14.1 | 45bp:18011532, 75bp:27739857              | DGRF1      | Blc | 25185 | RAL-358 | SRX006283 and | 42.5  | 42,499,891  | 15.2 | 47 |
| 70 | DGRP_399 | Bloomington-25192 | inbred line, mix of | SRX006153     | RAL-399     | SRR933575     | 75.0 | merged, use min length | 75.0  | DGRP-F1      | 27.48     | 36bp:41011932, 75bp:14665138              | DGRF1      | Blc | 25192 | RAL-399 | SRX006154 and | 51.6  | 51,632,558  | 15.5 | 48 |
| 71 | DGRP_313 | Bloomington-25180 | inbred line, mix of | SRX006277     | RAL-313     | SRR018519     | 75.0 | single end only        | 75.0  | DGRP-F1 + F2 | 14        | 36bp:9477876, 45bp:18165034, 75bp:5013814 | DGRF1 + F2 | Blc | 25180 | RAL-313 | SRX006277, SR | 39.1  | 39,060,649  | 11.7 | 49 |
| 72 | DGRP_375 | Bloomington-25188 | inbred line, mix of | SRX006148     | RAL-375     | SRR933572     | 75.0 | merged, use min length | 75.0  | DGRP-F1      | 51.8      | 55bp:52106222, 75bp:51413814              | DGRF1      | Blc | 25188 | RAL-375 | SRX006150, SR | 99.3  | 99,256,856  | 33.8 | 50 |
| 73 | DGRP_555 | Bloomington-25198 | inbred line, mix of | SRX006159     | RAL-555     | SRR933580     | 75.0 |                        | 75.0  | DGRP-F1      | 25.1      | 75bp:50103810                             | DGRF1      | Blc | 25198 | RAL-555 | SRX006159     | 44.9  | 44,883,398  | 19.2 | 51 |
| 74 | DGRP_705 | Bloomington-25744 | inbred line, mix of | SRX006162     | RAL-705     | SRR933585     | 75.0 |                        | 75.0  | DGRP-F1      | 23.5      | 75bp:47006608                             | DGRF1      | Blc | 25744 | RAL-705 | SRX006162     | 38.9  | 38,920,070  | 16.7 | 52 |
| 75 | DGRP_707 | Bloomington-25200 | inbred line, mix of | SRX006163     | RAL-707     | SRR933586     | 75.0 |                        | 75.0  | DGRP-F1      | 23.5      | 75bp:46657404                             | DGRF1      | Blc | 25200 | RAL-707 | SRX006163     | 41.6  | 41,568,952  | 17.8 | 53 |
| 76 | DGRP_712 | Bloomington-25201 | inbred line, mix of | SRX006164     | RAL-712     | SRR933587     | 75.0 |                        | 75.0  | DGRP-F1      | 22.3      | 75bp:44687888                             | DGRF1      | Blc | 25201 | RAL-712 | SRX006164     | 37.9  | 37,949,898  | 16.3 | 54 |
| 77 | DGRP_714 | Bloomington-25745 | inbred line, mix of | SRX006165     | RAL-714     | SRR933588     | 75.0 |                        | 75.0  | DGRP-F1      | 21.1      | 75bp:42099222                             | DGRF1      | Blc | 25745 | RAL-714 | SRX006165 and | 40.0  | 39,955,902  | 17.1 | 55 |
| 78 | DGRP_732 | Bloomington-25203 | inbred line, mix of | SRX006167     | RAL-732     | SRR933591     | 75.0 |                        | 75.0  | DGRP-F1      | 21.1      | 75bp:42170344                             | DGRF1      | Blc | 25203 | RAL-732 | SRX006167     | 38.1  | 38,082,012  | 16.3 | 56 |
| 79 | DGRP_379 | Bloomington-25189 | inbred line, mix of | SRX006293     | RAL-379     | SRR018583, SR | 75.0 | single end only        | 75.0  | DGRP-F1      | 6.1, 12.4 | 45bp:19006690, 75bp:18496338              | DGRF1      | Blc | 25189 | RAL-379 | SRX006293 and | 34.0  | 34,014,707  | 11.4 | 57 |
| 80 | DGRP_340 | Bloomington-28174 | inbred line, mix of | SRX156033     | RAL-340_75b | SRR835939     | 75.0 | merged, use min length | 100.0 | DGRP-F2      | 103.7     | 75bp:1788984, 100bp:16569712              | DGRF2      | Blc | 28174 | RAL-340 | SRX156030     | 130.2 | 130,158,488 | 73.8 | 12 |

This entry repeatedly gen

**PHASE 2: Additional DGRP Illumina-sequenced libraries compatible for TIDAL analysis loaded into TIDAL-Fly database but not part of analysis in paper.**

| Library | Stock ID* | Stock Location    | Genome Type         | SRA Accession | Library ID* | SRA Accession | Min Read Length | Read Length 1 | Read Length 2 | Data Group | Reads (M) | Raw Read Length:Read Number  | Freeze | Bloomington Stock | Synonym | NCBI SRA | Reads         | Mapped Reads | Mapped Coverage | Strains |    |
|---------|-----------|-------------------|---------------------|---------------|-------------|---------------|-----------------|---------------|---------------|------------|-----------|------------------------------|--------|-------------------|---------|----------|---------------|--------------|-----------------|---------|----|
| 1       | DGRP_365  | Bloomington-25445 | inbred line, mix of | SRX006290, SR | RAL-365     | SRR018680, SR | 75              |               | 75.0          | DGRP-F1    | 10.1      | 45bp:18394996, 75bp:32783196 | DGRF1  | Blc               | 25445   | RAL-365  | SRX006291, SR | 42.9         | 42,859,487      | 15.6    | 58 |
| 2       | DGRP_852  | Bloomington-25209 | inbred line, mix of | SRX006304, SR | RAL-852     | SRR018680     | 75              |               | 75.0          | DGRP-F1    | 11.7      | 45bp:41788724, 75bp:59375261 | DGRF1  | Blc               | 25209   | RAL-852  | SRX006304 and | 90.6         | 90,552,271      | 32.2    | 59 |
| 3       | DGRP_730  | Bloomington-25202 | inbred line, mix of | SRX006308     | RAL-730     | SRR933590     | 75              |               | 75.0          | DGRP-F1    | 38.7      | 75bp:38019145                | DGRF1  | Blc               | 25202   | RAL-730  | SRX006308     | 30.0         | 30,891,608      | 13.2    | 60 |
| 4       | DGRP_738  | Bloomington-28223 | inbred line, mix of | SRX021383     | RAL-738     | SRR933593     | 75              |               | 75.0          | DGRP-F1    | 37.9      | 75bp:75804598                | DGRF1  | Blc               | 28223   | RAL-738  | SRX021383     | 63.1         | 63,119,910      | 27.1    | 61 |
| 5       | DGRP_737  | Bloomington-28222 | inbred line, mix of | SRX021384     | RAL-737     | SRR933592     | 75              |               | 75.0          | DGRP-F1    | 37.4      | 75bp:74740132                | DGRF1  | Blc               | 28222   | RAL-737  | SRX021384     | 58.5         | 58,531,732      | 26.1    | 62 |
| 6       | DGRP_757  | Bloomington-28226 | inbred line, mix of | SRX021385     | RAL-757     | SRR933594     | 75              |               | 75.0          | DGRP-F1    | 37.2      | 75bp:74326240                | DGRF1  | Blc               | 28226   | RAL-757  | SRX021385     | 66.2         | 66,207,766      | 28.4    | 63 |
| 7       | DGRP_727  | Bloomington-28221 | inbred line, mix of | SRX021382     | RAL-727     | SRR933589     | 75              |               | 75.0          | DGRP-F1    | 36.9      | 75bp:73781476                | DGRF1  | Blc               | 28221   | RAL-727  | SRX021382     | 64.2         | 64,202,850      | 27.5    | 64 |
| 8       | DGRP_897  | Bloomington-28260 | inbred line, mix of | SRX021387     | RAL-897     | SRR933601     | 75              |               | 75.0          | DGRP-F1    | 35.4      | 75bp:70892788                | DGRF1  | Blc               | 28260   | RAL-897  | SRX021387     | 63.0         | 63,033,690      | 27      | 65 |
| 9       | DGRP_332  | Bloomington-28171 | inbred line, mix of | SRX021095     | RAL-332     | SRR933569     | 75              |               | 75.0          | DGRP-F1    | 33.8      | 75bp:65583082                | DGRF1  | Blc               | 28171   | RAL-332  | SRX021095     | 60.0         | 59,985,078      | 25.7    | 66 |
| 10      | DGRP_181  | Bloomington-28151 | inbred line, mix of | SRX020912     | RAL-181     | SRR933563     | 75              |               | 75.0          | DGRP-F1    | 32        | 75bp:64093862                | DGRF1  | Blc               | 28151   | RAL-181  | SRX020912     | 57.6         | 57,566,276      | 24.7    | 67 |
| 11      | DGRP_325  | Bloomington-28170 | inbred line, mix of | SRX021793     | RAL-325     | SRR933568     | 75              |               | 75.0          | DGRP-F1    | 31.5      | 75bp:31457046                | DGRF1  | Blc               | 28170   | RAL-325  | SRX021793     | 36.3         | 26,299,389      | 11.3    | 68 |
| 12      | DGRP_381  | Bloomington-28188 | inbred line, mix of | SRX021112     | RAL-381     | SRR933573     | 75              |               | 75.0          | DGRP-F1    | 27.2      | 75bp:54335852                | DGRF1  | Blc               | 28188   | RAL-381  | SRX021112     | 48.7         | 48,708,464      | 20.9    | 69 |
| 13      | DGRP_153  | Bloomington-28146 | inbred line, mix of | SRX021514     | RAL-153     | SRR933562     | 75              |               | 75.0          | DGRP-F1    | 26.8      | 75bp:26821499                | DGRF1  | Blc               | 28146   | RAL-153  | SRX021514     | 21.8         | 21,768,014      | 9.3     | 70 |
| 14      | DGRP_352  | Bloomington-28177 | inbred line, mix of | SRX021101     | RAL-352     | SRR834516     | 75              |               | 75.0          | DGRP-F1    | 22.5      | 75bp:44982388                | DGRF1  | Blc               | 28177   | RAL-352  | SRX021101     | 36.3         | 36,302,672      | 15.6    | 71 |
| 15      | DGRP_882  | Bloomington-28255 | inbred line, mix of | SRX021496     | RAL-882     | SRR835067     | 75              |               | 75.0          | DGRP-F1    | 22.4      | 75bp:44722324                | DGRF1  | Blc               | 28255   | RAL-882  | SRX021496     | 40.6         | 40,585,544      | 17.4    | 72 |
| 16      | DGRP_879  | Bloomington-28254 | inbred line, mix of | SRX021494     | RAL-879     | SRR835066     | 75              |               | 75.0          | DGRP-F1    | 21.7      | 75bp:43485194                | DGRF1  | Blc               | 28254   | RAL-879  | SRX021494     | 30.5         | 30,475,860      | 13.1    | 73 |
| 17      | DGRP_805  | Bloomington-28237 | inbred line, mix of | SRX021400     | RAL-805     | SRR835095     | 75              |               | 75.0          | DGRP-F1    | 21.6      | 75bp:43182102                | DGRF1  | Blc               | 28237   | RAL-805  | SRX021400     | 37.7         | 37,672,090      | 16.1    | 74 |
| 18      | DGRP_356  | Bloomington-28178 | inbred line, mix of | SRX023833     | RAL-356     | SRR834537     | 75              |               | 75.0          | DGRP-F1    | 21.5      | 75bp:42903612                | DGRF1  | Blc               | 28178   | RAL-356  | SRX023833     | 36.1         | 36,113,766      | 15.5    | 75 |
| 19      | DGRP_884  | Bloomington-28256 | inbred line, mix of | SRX021498     | RAL-884     | SRR835068     | 75              |               | 75.0          | DGRP-F1    | 21.3      | 75bp:42658114                | DGRF1  | Blc               | 28256   | RAL-884  | SRX021498     | 32.6         | 32,585,778      | 14      | 76 |
| 20      | DGRP_890  | Bloomington-28257 | inbred line, mix of | SRX021499     | RAL-890     | SRR835071     | 75              |               | 75.0          | DGRP-F1    | 21.0      | 75bp:41954706                | DGRF1  | Blc               | 28257   | RAL-890  | SRX021499     | 37.1         | 37,101,876      | 15.9    | 77 |
| 21      | DGRP_861  | Bloomington-28253 | inbred line, mix of | SRX021493     | RAL-861     | SRR835065     | 75              |               | 75.0          | DGRP-F1    | 20.6      | 75bp:41295320                | DGRF1  | Blc               | 28253   | RAL-861  | SRX021493     | 29.5         | 29,478,054      | 12.6    | 78 |
| 22      | DGRP_83   | Bloomington-28134 | inbred line, mix of | SRX023456     | RAL-83      | SRR835058     | 75              |               | 75.0          | DGRP-F1    | 20.5      | 75bp:41074070                | DGRF1  | Blc               | 28134   | RAL-83   | SRX023456     | 38.0         | 37,982,090      | 16.3    | 79 |
| 23      | DGRP_491  | Bloomington-28202 | inbred line, mix of | SRX021268     | RAL-491     | SRR835035     | 75              |               | 75.0          | DGRP-F1    | 20.6      | 75bp:40944392                | DGRF1  | Blc               | 28202   | RAL-491  | SRX021268     | 35.3         | 35,336,140      | 15.1    | 80 |
| 24      | DGRP_761  | Bloomington-28227 | inbred line, mix of | SRX021386     | RAL-761     | SRR835088     | 75              |               | 75.0          | DGRP-F1    | 20.4      | 75bp:40867250                | DGRF1  | Blc               | 28227   | RAL-761  | SRX021386     | 35.6         | 35,577,354      | 15.2    | 81 |
| 25      | DGRP_149  | Bloomington-28145 | inbred line, mix of | SRX020760     | RAL-149     | SRR834508     | 75              |               | 75.0          | DGRP-F1    | 20.3      | 75bp:40637646                | DGRF1  | Blc               | 28145   | RAL-149  | SRX020760     | 33.9         | 33,914,600      | 14.5    | 82 |
| 26      | DGRP_535  | Bloomington-28208 | inbred line, mix of | SRX021293     | RAL-535     | SRR835046     | 75              |               | 75.0          | DGRP-F1    | 20.1      | 75bp:40234802                | DGRF1  | Blc               | 28208   | RAL-535  | SRX021293     | 35.4         | 35,362,252      | 15.2    | 83 |
| 27      | DGRP_776  | Bloomington-28229 | inbred line, mix of | SRX021387     | RAL-776     | SRR835099     | 75              |               | 75.0          | DGRP-F1    | 19.9      | 75bp:39890986                | DGRF1  | Blc               | 28229   | RAL-776  | SRX021387     | 36.4         | 36,432,512      | 15.6    | 84 |
| 28      | DGRP_787  | Bloomington-28231 | inbred line, mix of | SRX021388     | RAL-787     | SRR835091     | 75              |               | 75.0          | DGRP-F1    | 19.9      | 75bp:39795416                | DGRF1  | Blc               | 28231   | RAL-787  | SRX021388     | 35.9         | 35,896,250      | 15.4    | 85 |
| 29      | DGRP_136  | Bloomington-28142 | inbred line, mix of | SRX020753     | RAL-136     | SRR834542     | 75              |               | 75.0          | DGRP-F1    | 19.5      | 75bp:38970964                | DGRF1  | Blc               | 28142   | RAL-136  | SRX020753     | 33.9         | 33,947,580      | 14.5    | 86 |
| 30      | DGRP_318  | Bloomington-28168 | inbred line, mix of | SRX021082     | RAL-318     | SRR834507     | 75              |               | 75.0          | DGRP-F1    | 19.5      | 75bp:38682636                | DGRF1  | Blc               | 28168   | RAL-318  | SRX021082     | 35.4         | 35,366,996      | 15.2    | 87 |
| 31      | DGRP_804  | Bloomington-28236 | inbred line, mix of | SRX021399     | RAL-804     | SRR835094     | 75              |               | 75.0          | DGRP-F1    | 19.5      | 75bp:38910810                | DGRF1  | Blc               | 28236   | RAL-804  | SRX021399     | 34.5         | 34,482,650      | 14.8    | 88 |
| 32      | DGRP_812  | Bloomington-28240 | inbred line, mix of | SRX021419     | RAL-812     | SRR835052     | 75              |               | 75.0          | DGRP-F1    | 19.4      | 75bp:38719004                | DGRF1  | Blc               | 28240   | RAL-812  | SRX021419     | 37.5         | 37,540,214      | 16.1    | 89 |
| 33      | DGRP_796  | Bloomington-28233 | inbred line, mix of | SRX021390     | RAL-796     | SRR835093     | 75              |               | 75.0          | DGRP-F1    | 19.3      | 75bp:38662002                | DGRF1  | Blc               | 28233   | RAL-796  | SRX021390     | 34.7         | 34,681,678      | 14.9    | 90 |
| 34      | DGRP_509  | Bloomington-28206 | inbred line, mix of | SRX021273     | RAL-509     | SRR835041     | 75              |               | 75.0          | DGRP-F1    | 19.0      | 75bp:38095912                | DGRF1  | Blc               | 28206   | RAL-509  | SRX021273     | 35.6         | 35,615,726      | 15.3    | 91 |
| 35      | DGRP_818  | Bloomington-28241 | inbred line, mix of | SRX021478     | RAL-818     | SRR835053     | 75              |               | 75.0          | DGRP-F1    | 18.8      | 75bp:37531016                | DGRF1  | Blc               | 28241   | RAL-818  | SRX021478     | 34.2         | 34,210,842      | 14.7    | 92 |
| 36      | DGRP_859  | Bloomington-25210 | inbred line, mix of | SRX006176     | RAL-859     | SRR933600     | 75              |               | 75.0          | DGRP-F1    | 18.5      | 75bp:36919488                | DGRF1  | Blc               | 25210   | RAL-859  | SRX006176     | 34.0         | 33,950,076      | 14.6    | 93 |
| 37      | DGRP_810  | Bloomington-28239 | inbred line, mix of | SRX021418     | RAL-810     | SRR835051     | 75              |               | 75.0          | DGRP-F1    | 18.5      | 75bp:36972402                | DGRF1  | Blc               | 28239   | RAL-810  | SRX021418     | 36.1         | 36,075,996      | 15.5    | 94 |
| 38      | DGRP_783  | Bloomington-28230 | inbred line, mix of | SRX023455     | RAL-783     | SRR835090     | 75              |               | 75.0          | DGRP-F1    | 18.3      | 75bp:36692434                | DGRF1  | Blc               | 28230   | RAL-783  | SRX023455     | 31.4         | 31,444,902      | 13.5    | 95 |
| 39      | DGRP_45   | Bloomington-28128 | inbred line, mix of | SRX021261     | RAL-45      | SRR835032     | 75              |               | 75.0          | DGRP-F1    | 18.2      | 75bp:36472946                | DGRF1  | Blc               | 28128   | RAL-45   | SRX021261     | 33.0         | 32,984,934      | 14.1    | 96 |
| 40      | DGRP_59   | Bloomington-28129 | inbred line, mix of | SRX021327     | RAL-59      | SRR8          |                 |               |               |            |           |                              |        |                   |         |          |               |              |                 |         |    |

|    |          |                   |                     |           |         |           |    |                        |      |              |      |                                         |            |     |       |         |               |      |            |      |     |
|----|----------|-------------------|---------------------|-----------|---------|-----------|----|------------------------|------|--------------|------|-----------------------------------------|------------|-----|-------|---------|---------------|------|------------|------|-----|
| 73 | DGRP_338 | Bloomington-28173 | inbred line, mix of | SRX021097 | RAL-338 | SRR834513 | 75 | 75                     | 75   | DGRP-F1      | 14.5 | 75bp:28907664                           | DGRF1      | Blo | 28173 | RAL-338 | SRX021097     | 26.0 | 25,964,076 | 11.1 | 126 |
| 74 | DGRP_228 | Bloomington-28157 | inbred line, mix of | SRX021043 | RAL-228 | SRR834529 | 75 | 75                     | 75   | DGRP-F1      | 14.4 | 75bp:28874696                           | DGRF1      | Blo | 28157 | RAL-228 | SRX021043     | 27.3 | 27,339,700 | 11.7 | 127 |
| 75 | DGRP_350 | Bloomington-28176 | inbred line, mix of | SRX021100 | RAL-350 | SRR834515 | 75 | 75                     | 75   | DGRP-F1      | 14.0 | 75bp:27970002                           | DGRF1      | Blo | 28176 | RAL-350 | SRX021100     | 25.4 | 25,355,594 | 10.9 | 128 |
| 76 | DGRP_317 | Bloomington-28167 | inbred line, mix of | SRX021081 | RAL-317 | SRR834506 | 75 | 75                     | 75   | DGRP-F1      | 13.6 | 75bp:27246088                           | DGRF1      | Blo | 28167 | RAL-317 | SRX021081     | 23.3 | 23,252,944 | 10   | 129 |
| 77 | DGRP_129 | Bloomington-28141 | inbred line, mix of | SRX020748 | RAL-129 | SRR834540 | 75 | 75                     | 75   | DGRP-F1      | 13.4 | 75bp:26898800                           | DGRF1      | Blo | 28141 | RAL-129 | SRX020748     | 25.8 | 25,797,252 | 11.1 | 130 |
| 78 | DGRP_26  | Bloomington-28123 | inbred line, mix of | SRX021056 | RAL-26  | SRR933566 | 75 | merged, use min length | 75.0 | DGRP-F1      | 18.4 | 44bp:4452211, 75bp:32432947             | DGRF1      | Blo | 28123 | RAL-26  | SRX021056     | 65.8 | 35,642,606 | 14.5 | 131 |
| 79 | DGRP_208 | Bloomington-25174 | inbred line, mix of | SRX005977 | RAL-208 | SRR933564 | 75 | merged, use min length | 75.0 | DGRP-F1 + F2 | 36.3 | 45bp:11112096, 64bp:8693462, 75bp:25174 | DGRF1 + F2 | Blo | 25174 | RAL-208 | SRX005977     | 69.8 | 69,801,276 | 27.5 | 132 |
| 80 | DGRP_237 | Bloomington-28160 | inbred line, mix of | SRX023423 | RAL-237 | SRR933565 | 75 | merged, use min length | 75.0 | DGRP-F1      | 29.1 | 44bp:15879498, 75bp:34500267            | DGRF1      | Blo | 28160 | RAL-237 | SRX023423 and | 45.0 | 44,995,628 | 16.7 | 133 |
| 81 | DGRP_28  | Bloomington-28124 | inbred line, mix of | SRX021783 | RAL-28  | SRR933567 | 75 | merged, use min length | 75.0 | DGRP-F1      | 26.4 | 44bp:15469056, 75bp:26422488            | DGRF1      | Blo | 28124 | RAL-28  | SRX021783 and | 39.1 | 39,097,863 | 14.1 | 134 |
| 82 | DGRP_41  | Bloomington-28126 | inbred line, mix of | SRX021791 | RAL-41  | SRR933576 | 75 | merged, use min length | 75.0 | DGRP-F1      | 24.4 | 44bp:14055721, 75bp:24438432            | DGRF1      | Blo | 28126 | RAL-41  | SRX021791 and | 36.1 | 36,082,067 | 13.1 | 135 |
| 83 | DGRP_639 | Bloomington-25199 | inbred line, mix of | SRX006161 | RAL-639 | SRR933582 | 75 | 75.0                   | 75.0 | DGRP-F1      | 21.1 | 75bp:42120400                           | DGRF1      | Blo | 25199 | RAL-639 | SRX006161 and | 39.0 | 39,197,668 | 16.7 | 136 |
| 84 | DGRP_799 | Bloomington-25207 | inbred line, mix of | SRX006173 | RAL-799 | SRR933597 | 75 | 75.0                   | 75.0 | DGRP-F1      | 20.7 | 75bp:41386692                           | DGRF1      | Blo | 25207 | RAL-799 | SRX006173 and | 38.9 | 38,942,298 | 16.7 | 137 |
| 85 | DGRP_386 | Bloomington-28192 | inbred line, mix of | SRX021798 | RAL-386 | SRR933574 | 75 | merged, use min length | 75.0 | DGRP-F1      | 20.5 | 44bp:11122819, 75bp:20778304            | DGRF1      | Blo | 28192 | RAL-386 | SRX021798 and | 29.6 | 29,626,175 | 10.8 | 138 |
| 86 | DGRP_820 | Bloomington-25208 | inbred line, mix of | SRX006174 | RAL-820 | SRR933598 | 75 | 75.0                   | 75.0 | DGRP-F1      | 18.8 | 75bp:37666476                           | DGRF1      | Blo | 25208 | RAL-820 | SRX006174 and | 33.9 | 33,910,170 | 14.5 | 139 |

**PHASE 3: Remaining DGRP Illumina-sequenced libraries compatible for TIDAL analysis to be loaded into TIDAL-Fly database.**

|     |          |                   |                     |           |         |           |    |      |      |         |      |               |       |     |       |         |           |       |             |       |  |
|-----|----------|-------------------|---------------------|-----------|---------|-----------|----|------|------|---------|------|---------------|-------|-----|-------|---------|-----------|-------|-------------|-------|--|
| 87  | DGRP_359 | Bloomington-28179 | inbred line, mix of | SRX023424 | RAL-359 | SRR834546 | 95 | 95.0 | 95.0 | DGRP-F1 | 18.6 | 95bp:37271884 | DGRF1 | Blo | 28179 | RAL-359 | SRX023424 | 37.3  | 37,271,884  | 20.2  |  |
| 88  | DGRP_589 | Bloomington-28213 | inbred line, mix of | SRX023837 | RAL-589 | SRR060821 | 75 | 75.0 | 75.0 | DGRP-F1 | 16.5 | 75bp:32998374 | DGRF1 | Blo | 28213 | RAL-589 | SRX023837 | 190.1 | 190,072,852 | 104.4 |  |
| 89  | DGRP_40  | Bloomington-29651 | inbred line, mix of | SRX021235 | RAL-40  | SRR835025 | 95 | 95   | 95   | DGRP-F1 | 34.5 | 95bp:69063428 | DGRF1 | Blo | 29651 | RAL-40  | SRX021235 | 61.3  | 61,345,170  | 33.3  |  |
| 90  | DGRP_321 | Bloomington-29655 | inbred line, mix of | SRX021094 | RAL-321 | SRR834511 | 95 | 95   | 95   | DGRP-F1 | 33.7 | 95bp:67314152 | DGRF1 | Blo | 29655 | RAL-321 | SRX021094 | 61.7  | 61,687,556  | 33.5  |  |
| 91  | DGRP_443 | Bloomington-28199 | inbred line, mix of | SRX021260 | RAL-443 | SRR835031 | 95 | 95   | 95   | DGRP-F1 | 28.8 | 95bp:57567568 | DGRF1 | Blo | 28199 | RAL-443 | SRX021260 | 52.5  | 52,492,412  | 28.5  |  |
| 92  | DGRP_38  | Bloomington-28125 | inbred line, mix of | SRX025317 | RAL-38  | SRR834541 | 95 | 95   | 95   | DGRP-F1 | 28.1 | 95bp:56154204 | DGRF1 | Blo | 28125 | RAL-38  | SRX025317 | 51.6  | 51,612,838  | 28    |  |
| 93  | DGRP_320 | Bloomington-29654 | inbred line, mix of | SRX021063 | RAL-320 | SRR834510 | 95 | 95   | 95   | DGRP-F1 | 25.9 | 95bp:51875680 | DGRF1 | Blo | 29654 | RAL-320 | SRX021063 | 44.5  | 44,510,214  | 24.2  |  |
| 94  | DGRP_406 | Bloomington-29657 | inbred line, mix of | SRX021254 | RAL-406 | SRR835024 | 95 | 95   | 95   | DGRP-F1 | 25.9 | 95bp:51821248 | DGRF1 | Blo | 29657 | RAL-406 | SRX021254 | 46.0  | 46,001,604  | 25    |  |
| 95  | DGRP_392 | Bloomington-28194 | inbred line, mix of | SRX021157 | RAL-392 | SRR834520 | 95 | 95   | 95   | DGRP-F1 | 25.8 | 95bp:51156880 | DGRF1 | Blo | 28194 | RAL-392 | SRX021157 | 42.8  | 42,803,392  | 23.2  |  |
| 96  | DGRP_405 | Bloomington-29656 | inbred line, mix of | SRX021242 | RAL-405 | SRR835023 | 95 | 95   | 95   | DGRP-F1 | 25.0 | 95bp:50080536 | DGRF1 | Blo | 29656 | RAL-405 | SRX021242 | 42.2  | 42,196,622  | 22.9  |  |
| 97  | DGRP_461 | Bloomington-28200 | inbred line, mix of | SRX021262 | RAL-461 | SRR835033 | 95 | 95   | 95   | DGRP-F1 | 24.7 | 95bp:49324528 | DGRF1 | Blo | 28200 | RAL-461 | SRX021262 | 40.4  | 40,407,678  | 21.9  |  |
| 98  | DGRP_177 | Bloomington-28150 | inbred line, mix of | SRX021026 | RAL-177 | SRR834547 | 95 | 95   | 95   | DGRP-F1 | 24.6 | 95bp:49114764 | DGRF1 | Blo | 28150 | RAL-177 | SRX021026 | 45.3  | 45,259,994  | 24.6  |  |
| 99  | DGRP_837 | Bloomington-28246 | inbred line, mix of | SRX021479 | RAL-837 | SRR835039 | 95 | 95   | 95   | DGRP-F1 | 23.2 | 95bp:46411536 | DGRF1 | Blo | 28246 | RAL-837 | SRX021479 | 38.0  | 38,040,748  | 20.7  |  |
| 100 | DGRP_892 | Bloomington-28258 | inbred line, mix of | SRX023838 | RAL-892 | SRR835072 | 95 | 95   | 95   | DGRP-F1 | 22.9 | 95bp:45702226 | DGRF1 | Blo | 28258 | RAL-892 | SRX023838 | 37.8  | 37,797,872  | 20.5  |  |
| 101 | DGRP_439 | Bloomington-29658 | inbred line, mix of | SRX021244 | RAL-439 | SRR835028 | 95 | 95   | 95   | DGRP-F1 | 22.4 | 95bp:44762436 | DGRF1 | Blo | 29658 | RAL-439 | SRX021244 | 37.5  | 37,522,394  | 20.4  |  |
| 102 | DGRP_492 | Bloomington-28203 | inbred line, mix of | SRX021270 | RAL-492 | SRR835036 | 95 | 95   | 95   | DGRP-F1 | 22.3 | 95bp:44803012 | DGRF1 | Blo | 28203 | RAL-492 | SRX021270 | 40.7  | 40,704,078  | 22.1  |  |
| 103 | DGRP_502 | Bloomington-28204 | inbred line, mix of | SRX021271 | RAL-502 | SRR835038 | 95 | 95   | 95   | DGRP-F1 | 22.2 | 95bp:44336646 | DGRF1 | Blo | 28204 | RAL-502 | SRX021271 | 40.0  | 39,968,920  | 21.7  |  |
| 104 | DGRP_370 | Bloomington-28182 | inbred line, mix of | SRX021104 | RAL-370 | SRR834539 | 95 | 95   | 95   | DGRP-F1 | 21.9 | 95bp:43793604 | DGRF1 | Blo | 28182 | RAL-370 | SRX021104 | 38.4  | 38,408,446  | 20.9  |  |
| 105 | DGRP_377 | Bloomington-28186 | inbred line, mix of | SRX023834 | RAL-377 | SRR834543 | 95 | 95   | 95   | DGRP-F1 | 21.9 | 95bp:43796182 | DGRF1 | Blo | 28186 | RAL-377 | SRX023834 | 40.2  | 40,225,994  | 21.8  |  |
| 106 | DGRP_426 | Bloomington-28196 | inbred line, mix of | SRX021245 | RAL-426 | SRR835026 | 95 | 95   | 95   | DGRP-F1 | 21.9 | 95bp:43746634 | DGRF1 | Blo | 28196 | RAL-426 | SRX021245 | 38.9  | 38,928,098  | 21.1  |  |
| 107 | DGRP_887 | Bloomington-28279 | inbred line, mix of | SRX021527 | RAL-887 | SRR835069 | 95 | 95   | 95   | DGRP-F1 | 21.8 | 95bp:43595728 | DGRF1 | Blo | 28279 | RAL-887 | SRX021527 | 35.9  | 35,939,248  | 19.5  |  |
| 108 | DGRP_440 | Bloomington-28197 | inbred line, mix of | SRX021246 | RAL-440 | SRR835029 | 95 | 95   | 95   | DGRP-F1 | 21.6 | 95bp:43161850 | DGRF1 | Blo | 28197 | RAL-440 | SRX021246 | 31.7  | 31,659,420  | 17.2  |  |
| 109 | DGRP_513 | Bloomington-29659 | inbred line, mix of | SRX021282 | RAL-513 | SRR835042 | 95 | 95   | 95   | DGRP-F1 | 21.3 | 95bp:42640722 | DGRF1 | Blo | 29659 | RAL-513 | SRX021282 | 36.0  | 36,025,830  | 19.6  |  |
| 110 | DGRP_508 | Bloomington-28205 | inbred line, mix of | SRX021272 | RAL-508 | SRR835040 | 95 | 95   | 95   | DGRP-F1 | 21.2 | 95bp:42338556 | DGRF1 | Blo | 28205 | RAL-508 | SRX021272 | 39.1  | 39,078,690  | 21.2  |  |
| 111 | DGRP_441 | Bloomington-28198 | inbred line, mix of | SRX023835 | RAL-441 | SRR835030 | 95 | 95   | 95   | DGRP-F1 | 21.1 | 95bp:42278010 | DGRF1 | Blo | 28198 | RAL-441 | SRX023835 | 34.4  | 34,448,902  | 18.7  |  |
| 112 | DGRP_531 | Bloomington-28207 | inbred line, mix of | SRX021290 | RAL-531 | SRR835045 | 95 | 95   | 95   | DGRP-F1 | 20.8 | 95bp:41560152 | DGRF1 | Blo | 28207 | RAL-531 | SRX021290 | 32.9  | 32,916,204  | 17.9  |  |
| 113 | DGRP_383 | Bloomington-28190 | inbred line, mix of | SRX021113 | RAL-383 | SRR834554 | 95 | 95   | 95   | DGRP-F1 | 19.9 | 95bp:39897030 | DGRF1 | Blo | 28190 | RAL-383 | SRX021113 | 35.1  | 35,149,446  | 19.1  |  |
| 114 | DGRP_235 | Bloomington-28275 | inbred line, mix of | SRX021053 | RAL-235 | SRR834531 | 95 | 95   | 95   | DGRP-F1 | 19.1 | 95bp:38296004 | DGRF1 | Blo | 28275 | RAL-235 | SRX021053 | 33.8  | 33,829,434  | 18.4  |  |
| 115 | DGRP_42  | Bloomington-28127 | inbred line, mix of | SRX021255 | RAL-42  | SRR835027 | 95 | 95   | 95   | DGRP-F1 | 18.6 | 95bp:37186556 | DGRF1 | Blo | 28127 | RAL-42  | SRX021255 | 37.2  | 37,186,556  | 20.2  |  |
| 116 | DGRP_21  | Bloomington-28122 | inbred line, mix of | SRX021040 | RAL-21  | SRR834526 | 95 | 95   | 95   | DGRP-F1 | 18.5 | 95bp:37046984 | DGRF1 | Blo | 28122 | RAL-21  | SRX021040 | 29.2  | 29,159,002  | 15.8  |  |
| 117 | DGRP_907 | Bloomington-28262 | inbred line, mix of | SRX021500 | RAL-907 | SRR835074 | 95 | 95   | 95   | DGRP-F1 | 18.2 | 95bp:36385056 | DGRF1 | Blo | 28262 | RAL-907 | SRX021500 | 32.3  | 32,273,788  | 17.5  |  |
| 118 | DGRP_790 | Bloomington-28232 | inbred line, mix of | SRX021389 | RAL-790 | SRR835092 | 95 | 95   | 95   | DGRP-F1 | 17.8 | 95bp:35620658 | DGRF1 | Blo | 28232 | RAL-790 | SRX021389 | 31.3  | 31,287,054  | 17    |  |
| 119 | DGRP_894 | Bloomington-28259 | inbred line, mix of | SRX021528 | RAL-894 | SRR835073 | 95 | 95   | 95   | DGRP-F1 | 17.8 | 95bp:35128536 | DGRF1 | Blo | 28259 | RAL-894 | SRX021528 | 30.9  | 30,860,088  | 16.8  |  |
| 120 | DGRP_832 | Bloomington-28245 | inbred line, mix of | SRX021477 | RAL-832 | SRR835057 | 95 | 95   | 95   | DGRP-F1 | 16.9 | 95bp:33770198 | DGRF1 | Blo | 28245 | RAL-832 | SRX021477 | 26.0  | 26,008,378  | 14.1  |  |
| 121 | DGRP_908 | Bloomington-28263 | inbred line, mix of | SRX021501 | RAL-908 | SRR835075 | 95 | 95   | 95   | DGRP-F1 | 16.8 | 95bp:39111536 | DGRF1 | Blo | 28263 | RAL-908 | SRX021501 | 36.7  | 36,702,788  | 19.9  |  |
| 122 | DGRP_911 | Bloomington-28264 | inbred line, mix of | SRX021502 | RAL-911 | SRR835076 | 95 | 95   | 95   | DGRP-F1 | 16.8 | 95bp:33571736 | DGRF1 | Blo | 28264 | RAL-911 | SRX021502 | 26.3  | 26,331,524  | 14.3  |  |
| 123 | DGRP_703 | Bloomington-28218 | inbred line, mix of | SRX021508 | RAL-703 | SRR835084 | 95 | 95   | 95   | DGRP-F1 | 16.5 | 95bp:32953564 | DGRF1 | Blo | 28218 | RAL-703 | SRX021508 | 26.3  | 26,272,930  | 14.3  |  |
| 124 | DGRP_385 | Bloomington-28191 | inbred line, mix of | SRX159098 | RAL-385 | SRR834518 | 95 | 95   | 95   | DGRP-F2 | 14.2 | 95bp:28408672 | DGRF2 | Blo | 28191 | RAL-385 | SRX159098 | 21.0  | 20,956,926  | 11.4  |  |
| 125 | DGRP_374 | Bloomington-28185 | inbred line, mix of | SRX023427 | RAL-374 | SRR835103 | 95 | 95   | 95   | DGRP-F1 | 13.9 | 95bp:27645755 | DGRF1 | Blo | 28185 | RAL-374 | SRX023427 | 24.7  | 24,704,590  | 13.4  |  |

**Table S1D. Drosophila Genome Nexus Strains in the TIDAL-Fly v1 database**

Genomes previously examined in Lack et al (Pool lab), Genetics 2015

**PHASE 1: First Set of Libraries Analyzed for the paper. The remaining libraries in Phase 2 below are also listed in the TIDAL-Fly database**

|    | Stock ID* | Stock Location | Genome Type    | SRA Accession | Library ID* | SRA Accession | Min Read Length | Reads (M) | Read Length 1 | Read Length 2 | Data Group | Focal Genome Repr | Coverage**  | Mean Depth** |
|----|-----------|----------------|----------------|---------------|-------------|---------------|-----------------|-----------|---------------|---------------|------------|-------------------|-------------|--------------|
| 1  | CK1       | Langley lab    | haploid_embryo | SRX058145     | CK1_1-HE    | SRR189038     | 75              | 35.0      | 76            | 76            | DPGP2      | X,2L,2R,3L,3R     | 110,870,215 | 39.4         |
| 2  | CK2       | Langley lab    | haploid_embryo | SRX058146     | CK2_1-HE    | SRR189040     | 145             | 20.6      | 146           | 146           | DPGP2      | X,2L,2R,3L,3R     | 111,567,582 | 44.7         |
| 3  | CO13N     | Pool Lab       | haploid_embryo | SRX058151     | CO13N_1-HE  | SRR189045     | 145             | 18.1      | 146           | 146           | DPGP2      | X,2L,2R,3L,3R     | 111,264,202 | 39.8         |
| 4  | CO15N     | Pool Lab       | haploid_embryo | SRX058153     | CO15N_1-HE  | SRR189047     | 75              | 38.2      | 76            | 76            | DPGP2      | X,2L,2R,3L,3R     | 111,058,052 | 44.2         |
| 5  | CO4N      | Pool Lab       | haploid_embryo | SRX058156     | CO4N_1-HE   | SRR189050     | 75              | 32.8      | 76            | 76            | DPGP2      | X,2L,2R,3L,3R     | 111,025,671 | 37.7         |
| 6  | EA119     | Pool Lab       | haploid_embryo | SRX791698     | EA119_1-HE  | SRR1686794    | 100             | 16.6      | 100           | 100           | AGES       | X,2L,2R,3L,3R     | 110,802,511 | 23.9         |
| 7  | EA49      | Pool Lab       | haploid_embryo | SRX791713     | EA49_1-HE   | SRR1686797    | 100             | 13.0      | 100           | 100           | AGES       | X,2L,2R,3L,3R     | 110,446,851 | 18.2         |
| 8  | EA87      | Pool Lab       | haploid_embryo | SRX791850     | EA87_1-HE   | SRR1686966    | 100             | 27.6      | 100           | 100           | AGES       | X,2L,2R,3L,3R     | 111,259,464 | 38.9         |
| 9  | EB148     | Langley lab    | haploid_embryo | SRX791858     | EB148_1-HE  | SRR1686971    | 100             | 19.1      | 100           | 100           | AGES       | X,2L,2R,3L,3R     | 110,799,356 | 27.4         |
| 10 | EB18      | Langley lab    | haploid_embryo | SRX792309     | EB18_1-HE   | SRR1687447    | 100             | 16.5      | 100           | 100           | AGES       | X,2L,2R,3L,3R     | 110,159,072 | 22.7         |
| 11 | EB25      | Langley lab    | haploid_embryo | SRX792329     | EB25_1-HE   | SRR1687462    | 100             | 15.6      | 100           | 100           | AGES       | X,2L,2R,3L,3R     | 103,098,821 | 19.4         |
| 12 | EF39      | Pool lab       | haploid_embryo | SRX792510     | EF39_1-HE   | SRR1687668    | 100             | 17.7      | 100           | 100           | AGES       | X,2L,2R,3L,3R     | 110,937,745 | 24.9         |
| 13 | EF65      | Pool lab       | haploid_embryo | SRX792606     | EF65_1-HE   | SRR1687770    | 100             | 12.2      | 100           | 100           | AGES       | X,2L,2R,3L,3R     | 107,539,051 | 17.1         |
| 14 | EF78      | Pool lab       | haploid_embryo | SRX792639     | EF78_1-HE   | SRR1687793    | 100             | 16.8      | 100           | 100           | AGES       | X,2L,2R,3L,3R     | 110,871,321 | 23.8         |
| 15 | EG40N     | Pool lab       | inbred_line    | SRX792675     | EG40N       | SRR1687832    | 100             | 10.8      | 100           | 100           | AGES       | X,2R              | 25,659,426  | 14.3         |
| 16 | EG69N     | Pool lab       | inbred_line    | SRX793022     | EG69N       | SRR1688188    | 100             | 10.2      | 100           | 100           | AGES       | X,2L,2R,3R        | 73,335,770  | 13.6         |
| 17 | EG73N     | Pool lab       | inbred_line    | SRX793046     | EG73N       | SRR1688222    | 100             | 10.3      | 100           | 100           | AGES       | X,2L,2R,3L,3R     | 105,554,844 | 13.8         |
| 18 | FR180     | Pool Lab       | haploid_embryo | SRX058184     | FR180_2-HE  | SRR189090     | 145             | 19.1      | 146           | 146           | DPGP2      | X,2L,2R,3L,3R     | 112,084,373 | 42.3         |
| 19 | FR207     | Pool Lab       | haploid_embryo | SRX058185     | FR207_2-HE  | SRR189091     | 145             | 18.1      | 146           | 146           | DPGP2      | X,2L,2R,3L,3R     | 112,168,144 | 38.9         |
| 20 | FR229     | Pool Lab       | haploid_embryo | SRX058187     | FR229_2-HE  | SRR189093     | 145             | 19.1      | 146           | 146           | DPGP2      | X,2L,2R,3L,3R     | 112,159,960 | 40.6         |
| 21 | GA129     | Pool lab       | haploid_embryo | SRX058193     | GA129_1-HE  | SRR189101     | 75              | 41.4      | 76            | 76            | DPGP2      | X,2L,2R,3L,3R     | 111,099,834 | 47.9         |
| 22 | GA130     | Pool lab       | haploid_embryo | SRX058194     | GA130_1-HE  | SRR189102     | 75              | 43.4      | 76            | 76            | DPGP2      | X,2L,2R,3L,3R     | 111,771,726 | 47.6         |
| 23 | GA141     | Pool lab       | haploid_embryo | SRX058196     | GA141_1-HE  | SRR189105     | 75              | 40.7      | 76            | 76            | DPGP2      | X,2L,2R,3L,3R     | 111,146,499 | 45.1         |
| 24 | GU10      | Langley lab    | haploid_embryo | SRX058205     | GU10_1-HE   | SRR189114     | 75              | 33.2      | 76            | 76            | DPGP2      | X,2L,2R,3L,3R     | 110,887,105 | 38.9         |
| 25 | GU2       | Langley lab    | haploid_embryo | SRX058207     | GU2_1-HE    | SRR189117     | 75              | 33.0      | 76            | 76            | DPGP2      | X,2L,2R,3L,3R     | 110,886,266 | 38.4         |
| 26 | GU6       | Langley lab    | haploid_embryo | SRX058209     | GU6_1-HE    | SRR189120     | 75              | 33.0      | 76            | 76            | DPGP2      | X,2L,2R,3L,3R     | 110,933,340 | 38.1         |
| 27 | KN133N    | Langley lab    | haploid_embryo | SRX058256     | KN133N_1-HE | SRR189242     | 75              | 30.1      | 76            | 76            | DPGP2      | X,2L,2R,3L,3R     | 111,123,747 | 35.0         |
| 28 | KN20N     | Langley lab    | haploid_embryo | SRX058253     | KN20N_1-HE  | SRR189239     | 75              | 32.0      | 76            | 76            | DPGP2      | X,2L,2R,3L,3R     | 110,974,588 | 37.6         |
| 29 | KN35      | Langley lab    | haploid_embryo | SRX058258     | KN35_1-HE   | SRR189245     | 75              | 30.2      | 76            | 76            | DPGP2      | X,2L,2R,3L,3R     | 111,066,184 | 34.3         |
| 30 | KR39      | Langley lab    | haploid_embryo | SRX058267     | KR39_1-HE   | SRR189254     | 75              | 30.2      | 76            | 76            | DPGP2      | X,2L,2R,3L,3R     | 111,101,981 | 34.7         |
| 31 | KR42      | Langley lab    | haploid_embryo | SRX058268     | KR42_1-HE   | SRR189255     | 75              | 28.5      | 76            | 76            | DPGP2      | X,2L,2R,3L,3R     | 110,823,311 | 32.9         |
| 32 | KR4N      | Langley lab    | haploid_embryo | SRX058269     | KR4N_1-HE   | SRR189256     | 75              | 29.5      | 76            | 76            | DPGP2      | X,2L,2R,3L,3R     | 111,045,036 | 29.6         |
| 33 | KT1       | Langley lab    | haploid_embryo | SRX058273     | KT1_1-HE    | SRR189260     | 75              | 25.5      | 76            | 76            | DPGP2      | X,2L,2R,3L,3R     | 111,229,668 | 37.6         |
| 34 | KT6       | Langley lab    | haploid_embryo | SRX058274     | KT6_1-HE    | SRR189262     | 75              | 27.6      | 76            | 76            | DPGP2      | X,2L,2R,3L,3R     | 111,074,001 | 29.6         |
| 35 | NG10N     | Langley lab    | haploid_embryo | SRX058275     | NG10N_1-HE  | SRR189263     | 75              | 33.5      | 76            | 76            | DPGP2      | X,2L,2R,3L,3R     | 111,001,728 | 38.9         |
| 36 | NG3N      | Pool lab       | haploid_embryo | SRX058378     | NG3N_1-HE   | SRR189414     | 75              | 32.3      | 76            | 76            | DPGP2      | X,2L,2R,3L,3R     | 111,022,313 | 36.4         |
| 37 | NG6N      | Pool lab       | haploid_embryo | SRX058278     | NG6N_1-HE   | SRR189266     | 75              | 33.9      | 76            | 76            | DPGP2      | X,2L,2R,3L,3R     | 111,483,632 | 38.4         |
| 38 | RC1       | Langley lab    | haploid_embryo | SRX058281     | RC1_1-HE    | SRR189269     | 75              | 26.2      | 76            | 76            | DPGP2      | X,2L,2R,3L,3R     | 110,659,330 | 30.3         |
| 39 | RC5       | Langley lab    | haploid_embryo | SRX058282     | RC5_1-HE    | SRR189270     | 75              | 29.6      | 76            | 76            | DPGP2      | X,2L,2R,3L,3R     | 110,723,230 | 24.9         |
| 40 | RG33      | Pool lab       | haploid_embryo | SRX058353     | RG33_1-HE   | SRR189389     | 145             | 37.0      | 146           | 146           | DPGP2      | X,2L,2R,3L,3R     | 111,689,097 | 69.8         |
| 41 | RG4N      | Pool lab       | haploid_embryo | SRX058362     | RG4N_1-HE   | SRR306629     | 145             | 24.9      | 146           | 146           | DPGP2      | X,2L,2R,3L,3R     | 111,396,200 | 54.2         |
| 42 | RG6N      | Langley lab    | haploid_embryo | SRX058368     | RG6N_1-HE   | SRR306624     | 145             | 22.0      | 146           | 146           | DPGP2      | X,2L,2R,3L,3R     | 111,216,270 | 47.7         |
| 43 | SB10      | Pool lab       | haploid_embryo | SRX799453     | SB10_1-HE   | SRR1696817    | 100             | 23.7      | 100           | 100           | AGES       | X,2L,2R,3L,3R     | 111,238,977 | 34.2         |

|    |        |                  |                |           |            |            |     |      |     |     |       |               |             |      |
|----|--------|------------------|----------------|-----------|------------|------------|-----|------|-----|-----|-------|---------------|-------------|------|
| 44 | SB16   | Pool lab         | haploid_embryo | SRX799458 | SB16_1-HE  | SRR1696818 | 100 | 24.1 | 100 | 100 | AGES  | X,2L,2R,3L,3R | 111,438,387 | 32.4 |
| 45 | SB31   | Pool lab         | haploid_embryo | SRX799471 | SB31_1-HE  | SRR1696822 | 100 | 21.4 | 100 | 100 | AGES  | X,2L,2R,3L,3R | 110,110,096 | 30.2 |
| 46 | SF332  | Langley lab      | haploid_embryo | SRX799661 | SF332_1-HE | SRR1696987 | 100 | 13.7 | 100 | 100 | AGES  | X,2L,2R,3L,3R | 110,582,475 | 19.9 |
| 47 | SF428  | Langley lab      | haploid_embryo | SRX799663 | SF428_1-HE | SRR1696988 | 100 | 12.6 | 100 | 100 | AGES  | X,2L,2R,3L,3R | 110,495,354 | 16.5 |
| 48 | SF447  | Pool lab         | haploid_embryo | SRX799664 | SF447_1-HE | SRR1696989 | 100 | 15.3 | 100 | 100 | AGES  | X,2L,2R,3L,3R | 110,719,070 | 20.7 |
| 49 | SP188  | Langley lab      | haploid_embryo | SRX058287 | SP188_1-HE | SRR306632  | 145 | 18.4 | 146 | 146 | DPGP2 | X,2L,2R,3L,3R | 111,309,908 | 38.6 |
| 50 | SP221  | Pool lab         | haploid_embryo | SRX058288 | SP221_1-HE | SRR189277  | 145 | 18.9 | 146 | 146 | DPGP2 | X,2L,2R,3L,3R | 111,199,509 | 40.7 |
| 51 | SP80   | Langley lab      | haploid_embryo | SRX058292 | SP80_1-HE  | RR189281   | 145 | 18.3 | 146 | 146 | DPGP2 | X,2L,2R,3L,3R | 111,128,089 | 41.6 |
| 52 | TZ10   | Langley lab      | haploid_embryo | SRX058283 | TZ10_1-HE  | SRR189272  | 75  | 23.4 | 76  | 76  | DPGP2 | X,2L,2R,3L,3R | 110,737,417 | 26.9 |
| 53 | TZ14   | Langley lab      | haploid_embryo | SRX058284 | TZ14_1-HE  | SRR189273  | 75  | 31.7 | 76  | 76  | DPGP2 | X,2L,2R,3L,3R | 111,045,117 | 35.3 |
| 54 | TZ8    | Langley lab      | haploid_embryo | SRX058285 | TZ8_1-HE   | SRR189274  | 75  | 31.2 | 76  | 76  | DPGP2 | X,2L,2R,3L,3R | 110,920,135 | 35.9 |
| 55 | UG19   | Pool lab         | haploid_embryo | SRX058376 | UG19_1-HE  | SRR189412  | 75  | 33.9 | 76  | 76  | DPGP2 | X,2L,2R,3L,3R | 110,998,446 | 37.2 |
| 56 | UG28N  | Pool lab         | haploid_embryo | SRX058277 | UG28N_1-HE | SRR189265  | 75  | 33.1 | 76  | 76  | DPGP2 | X,2L,2R,3L,3R | 110,922,524 | 38.8 |
| 57 | UG5N   | Pool lab         | haploid_embryo | SRX058379 | UG5N_1-HE  | SRR189415  | 75  | 32.1 | 76  | 76  | DPGP2 | X,2L,2R,3L,3R | 111,110,172 | 34.2 |
| 58 | UK120  | Langley lab      | haploid_embryo | SRX799667 | UK120_1-HE | SRR1696992 | 100 | 15.6 | 100 | 100 | AGES  | X,2L,2R,3L,3R | 108,541,523 | 23.2 |
| 59 | UK2    | Langley lab      | haploid_embryo | SRX799668 | UK2_1-HE   | SRR1696993 | 100 | 18.3 | 100 | 100 | AGES  | X,2L,2R,3L,3R | 111,035,774 | 25.2 |
| 60 | UK57   | Langley lab      | haploid_embryo | SRX799669 | UK57_1-HE  | SRR1696994 | 100 | 20.7 | 100 | 100 | AGES  | X,2L,2R,3L,3R | 110,904,117 | 29.9 |
| 61 | ZI191  | Langley/Pool Lab | haploid_embryo | SRR202128 | ZI191-HE   | SRR202128  | 145 | 23.3 | 146 | 146 | DPGP3 | X,2L,2R,3L,3R | 110,845,648 | 49.2 |
| 62 | ZI216N | Langley/Pool Lab | haploid_embryo | SRR203328 | ZI216N-HE  | SRR203328  | 145 | 20.4 | 146 | 146 | DPGP3 | X,2L,2R,3L,3R | 111,176,278 | 44.2 |
| 63 | ZI220  | Langley/Pool Lab | haploid_embryo | SRR203067 | ZI220-HE   | SRR203067  | 145 | 23.2 | 146 | 146 | DPGP3 | X,2L,2R,3L,3R | 111,180,528 | 51.3 |
| 64 | ZI227  | Langley/Pool Lab | haploid_embryo | SRR202126 | ZI227-HE   | SRR202126  | 145 | 25.7 | 146 | 146 | DPGP3 | X,2L,2R,3L,3R | 111,269,290 | 54.7 |
| 65 | ZI254N | Langley/Pool Lab | haploid_embryo | SRR203335 | ZI254N-HE  | SRR203335  | 145 | 18.1 | 146 | 146 | DPGP3 | X,2L,2R,3L,3R | 111,099,774 | 41.2 |
| 66 | ZI273N | Langley/Pool Lab | haploid_embryo | SRR210786 | ZI273N-HE  | SRR210786  | 145 | 21.1 | 146 | 146 | DPGP3 | X,2L,2R,3L,3R | 111,341,925 | 43.2 |
| 67 | ZS11   | Langley lab      | haploid_embryo | SRX058372 | ZS11_1-HE  | SRR189408  | 75  | 32.4 | 76  | 76  | DPGP2 | X,2L,2R,3L,3R | 110,736,467 | 37.7 |
| 68 | ZS37   | Langley lab      | haploid_embryo | SRX058373 | ZS37_1-HE  | SRR189409  | 75  | 36.0 | 76  | 76  | DPGP2 | X,2L,2R,3L,3R | 110,877,107 | 41.2 |
| 69 | ZS5    | Langley lab      | haploid_embryo | SRX058374 | ZS5_1-HE   | SRR900425  | 75  | 33.4 | 76  | 76  | DPGP2 | X,2L,2R,3L,3R | 110,504,765 | 38.2 |
| 70 | ZS56   | Langley lab      | haploid_embryo | SRX058375 | ZS56_1-HE  | SRR189411  | 75  | 30.7 | 76  | 76  | DPGP2 | X,2L,2R,3L,3R | 110,737,628 | 36.0 |

**Table S1E. Key for Two-letter code for the demography of the Drosophila Genome Nexus Strains in the TIDAL-Fly v1 database**

|    | Populatio  | Country      | Locality    | Date    | Collector(s)            | Latitude (N) | Longitude (E) | Elevation | Number of genomes for each euchromatic chromosome |     |     | Comments                                                         |
|----|------------|--------------|-------------|---------|-------------------------|--------------|---------------|-----------|---------------------------------------------------|-----|-----|------------------------------------------------------------------|
|    |            |              |             |         |                         |              |               |           | X                                                 | 2   | 3   |                                                                  |
| 1  | <b>CK</b>  | Congo        | Kisangani   | 8/2010  | J. Kennis               | 0.51         | 25.19         | 400       | 2                                                 | 2   | 2   |                                                                  |
| 2  | <b>CO</b>  | Cameroon     | Oku         | 4/2004  | J. Pool                 | 6.25         | 10.43         | 2169      | 10                                                | 10  | 10  | 3 additional chromosome 3 extractions exist, but derive from str |
| 3  | <b>EA</b>  | Ethiopia     | Gambella    | 12/2011 | R. Corbett-Detig        | 8.25         | 34.59         | 525       | 4                                                 | 4   | 4   |                                                                  |
| 4  | <b>EB</b>  | Ethiopia     | Bonga       | 12/2011 | R. Corbett-Detig        | 7.26         | 36.25         | 1725      | 5                                                 | 5   | 5   |                                                                  |
| 5  | <b>ED</b>  | Ethiopia     | Dodola      | 12/2008 | J. Pool                 | 6.98         | 39.18         | 2492      | 6                                                 | 7   | 6   |                                                                  |
| 6  | <b>EF</b>  | Ethiopia     | Fiche       | 12/2011 | R. Corbett-Detig        | 9.81         | 38.63         | 3070      | 5                                                 | 5   | 5   |                                                                  |
| 7  | <b>EG</b>  | Egypt        | Cairo       | 1/2011  | J. Atallah              | 30.10        | 31.32         | 25        | 3                                                 | 2   | 2   | contains heterozygous intervals (masked in consensus sequenc     |
| 8  | <b>EM</b>  | Ethiopia     | Masha       | 12/2011 | R. Corbett-Detig        | 7.74         | 35.48         | 2260      | 3                                                 | 3   | 3   |                                                                  |
| 9  | <b>ER</b>  | Ethiopia     | Debre Birha | 12/2011 | R. Corbett-Detig        | 9.68         | 39.53         | 2840      | 5                                                 | 5   | 5   |                                                                  |
| 10 | <b>EZ</b>  | Ethiopia     | Ziway       | 12/2008 | J. Pool                 | 7.93         | 38.72         | 1642      | 5                                                 | 4   | 5   |                                                                  |
| 11 | <b>FR</b>  | France       | Lyon        | 7/2010  | J. Pool                 | 45.77        | 4.86          | 175       | 9                                                 | 9   | 9   |                                                                  |
| 12 | <b>GA</b>  | Gabon        | Franceville | 3/2002  | B. Ballard & S. Charlat | -1.65        | 13.60         | 332       | 10                                                | 9   | 10  | GA191 is missing chromosome 2 data due to heterozygosity         |
| 13 | <b>GU</b>  | Guinea       | Dondé       | 6/2005  | B. B. Sow               | 10.70        | -12.25        | 801       | 5                                                 | 5   | 7   |                                                                  |
| 14 | <b>KM</b>  | Kenya        | Malindi     | 7/2002  | B. Ballard              | -1.43        | 40.03         | 78        | 4                                                 | 3   | 1   | contains heterozygous intervals (masked in consensus sequenc     |
| 15 | <b>KN</b>  | Kenya        | Nyahururu   | 1/2009  | J. Pool                 | 0.04         | 36.36         | 2303      | 6                                                 | 5   | 6   |                                                                  |
| 16 | <b>KO</b>  | Kenya        | Molo        | 1/2009  | J. Pool                 | -0.25        | 35.73         | 2506      | 4                                                 | 0   | 4   |                                                                  |
| 17 | <b>KR</b>  | Kenya        | Marigat     | 1/2009  | J. Pool                 | 0.47         | 35.98         | 1062      | 6                                                 | 4   | 6   |                                                                  |
| 18 | <b>KT</b>  | Kenya        | Thika       | 1/2009  | J. Pool                 | -1.04        | 37.08         | 1531      | 2                                                 | 2   | 2   |                                                                  |
| 19 | <b>NG</b>  | Nigeria      | Maiduguri   | 9/2004  | D. Gwary & B. Sastawa   | 11.85        | 13.16         | 295       | 6                                                 | 6   | 6   |                                                                  |
| 20 | <b>RAL</b> | United State | Raleigh NC  | 2003    | T. Mackay               | 35.76        | -78.66        | 91        | 205                                               | 205 | 205 | (sample sizes before heterozygosity and IBD masking)             |
| 21 | <b>RC</b>  | Rwanda       | Cyangugu    | 12/2008 | J. Pool                 | -2.29        | 28.55         | 1602      | 2                                                 | 2   | 2   |                                                                  |
| 22 | <b>RG</b>  | Rwanda       | Gikongoro   | 12/2008 | J. Pool                 | -2.49        | 28.92         | 1927      | 27                                                | 27  | 27  |                                                                  |
| 23 | <b>SB</b>  | South Africa | Barkly East | 12/2011 | J. Pool                 | -30.97       | 27.59         | 1800      | 5                                                 | 5   | 5   |                                                                  |
| 24 | <b>SD</b>  | South Africa | Dullstroom  | 12/2011 | J. Pool                 | -25.42       | 30.10         | 2000      | 5                                                 | 4   | 5   | SD82 is missing chromosome 2 data due to heterozygosity          |
| 25 | <b>SE</b>  | South Africa | Port Edward | 12/2011 | J. Pool                 | -31.06       | 30.22         | 50        | 3                                                 | 3   | 3   |                                                                  |
| 26 | <b>SF</b>  | South Africa | Fouriesburg | 12/2011 | J. Pool                 | -28.60       | 28.05         | 1800      | 5                                                 | 4   | 5   | SF7 is missing chromosome 2 data due to heterozygosity           |
| 27 | <b>SP</b>  | South Africa | Phalaborwa  | 7/2010  | R. Corbett-Detig        | -23.94       | 31.14         | 350       | 7                                                 | 7   | 7   |                                                                  |
| 28 | <b>TZ</b>  | Tanzania     | Uyole       | 12/2009 | L. Nsemwa               | -8.89        | 33.44         | 1800      | 3                                                 | 3   | 3   |                                                                  |
| 29 | <b>UG</b>  | Uganda       | Namulonge   | 4/2005  | J. Ogwang               | 0.53         | 32.60         | 1134      | 4                                                 | 4   | 6   |                                                                  |
| 30 | <b>UK</b>  | Uganda       | Kisoro      | 1/2012  | R. Corbett-Detig        | -1.28        | 29.69         | 1925      | 5                                                 | 4   | 5   | UK120 is missing chromosome 2 data due to heterozygosity         |
| 31 | <b>UM</b>  | Uganda       | Masindi     | 7/2010  | J. Pool                 | 1.68         | 31.72         | 1170      | 3                                                 | 3   | 3   |                                                                  |
| 32 | <b>ZI</b>  | Zambia       | Siavonga    | 7/2010  | R. Corbett-Detig        | -16.54       | 28.72         | 530       | 196                                               | 197 | 197 | ZI382 is missing chromosome X due to heterozygosity              |
| 33 | <b>ZK</b>  | Zimbabwe     | Lake Kariba | 5/1994  | T. Mutangadura          | -16.52       | 28.80         | 619       | 3                                                 | 0   | 2   | contains heterozygous intervals (masked in consensus sequenc     |
| 34 | <b>ZL</b>  | Zambia       | Livingstone | 7/2010  | R. Corbett-Detig        | -17.86       | 25.86         | 900       | 1                                                 | 1   | 1   |                                                                  |
| 35 | <b>ZO</b>  | Zambia       | Solwezi     | 7/2010  | R. Corbett-Detig        | -12.18       | 26.40         | 1380      | 2                                                 | 2   | 2   |                                                                  |
| 36 | <b>ZS</b>  | Zimbabwe     | Sengwa      | 9/1990  | R. Ramey                | -18.16       | 28.22         | 865       | 4                                                 | 4   | 4   |                                                                  |



Table S1F. Pools of flies analyzed in the TIDAL-Fly v1 database

|    | Fly Pool ID | Fly Pool Location                               | Genome Type               | SRA Accession | Library ID*    | SRA Accession          | Min Read Length | Reads (M) | Read Length 1 | Read Length 2 | Reference              |
|----|-------------|-------------------------------------------------|---------------------------|---------------|----------------|------------------------|-----------------|-----------|---------------|---------------|------------------------|
| 1  | AU-C1       | Australia, Cairns                               | Pool                      | SRR1177951    | pool-AU-C1     | SRR1177951             | 75              | 26M       | 75            | 0             | Reinhardt et al., 2014 |
| 2  | AU-CR       | Australia, Cardwell                             | Pool                      | SRR1177952    | pool-AU-CR     | SRR1177952             | 75              | 36M       | 75            | 0             | Reinhardt et al., 2014 |
| 3  | AU-MO       | Australia, Miller's Orchard                     | Pool                      | SRR1177953    | pool-AU-MO     | SRR1177953             | 75              | 24M       | 75            | 0             | Reinhardt et al., 2014 |
| 4  | AU-SO       | Australia, Sorell                               | Pool                      | SRR1177955    | pool-AU-SO     | SRR1177955             | 75              | 38M       | 75            | 0             | Reinhardt et al., 2014 |
| 5  | EU-PO1      | Europe, Portugal                                | Pool                      | SRR188217     | pool-EU-PO1    | SRR188217              | 75              | 19.5M     | 75            | 75            | Kofler et al., 2012    |
| 6  | EU-PO2      | Europe, Portugal                                | Pool                      | SRR189066     | pool-EU-PO2    | SRR189066              | 73              | 60.9M     | 74            | 74            | Kofler et al., 2012    |
| 7  | NA-SC       | North America, Eutawville, SC                   | 50-100 pooled individuals | SRX661835     | pool-NA-SC     | SRR1525696             | 100             | 82M       | 100           | 100           | Bergland et al., 2014  |
| 8  | NA-GA       | North America, Hahira, GA                       | 50-100 pooled individuals | SRX661834     | pool-NA-GA     | SRR1525695             | 100             | 97M       | 100           | 100           | Bergland et al., 2014  |
| 9  | NA-NC       | North America, 90 of the DGRP fly strains       | Pool                      | SRX661836     | pool-NA-NC     | SRR1525697             | 90              | 42M       | 90            | 90            | Bergland et al., 2014  |
| 10 | NA-PA1      | North America, Linvilla, PA, spring 2009        | 50-100 pooled individuals | SRX661837     | pool-NA-PA1    | SRR1525768             | 100             | 181M      | 100           | 100           | Bergland et al., 2014  |
| 11 | NA-PA2      | North America, Linvilla, PA, fall 2009          | 50-100 pooled individuals | SRX661838     | pool-NA-PA2    | SRR1525769             | 100             | 73.7M     | 100           | 100           | Bergland et al., 2014  |
| 12 | NA-PA3      | North America, Linvilla, PA, spring 2010        | 50-100 pooled individuals | SRX661839     | pool-NA-PA3    | SRR1525770             | 100             | 35M       | 100           | 100           | Bergland et al., 2014  |
| 13 | NA-PA4      | North America, Linvilla, PA, fall 2010          | 50-100 pooled individuals | SRX661840     | pool-NA-PA4    | SRR1525771             | 100             | 70M       | 100           | 100           | Bergland et al., 2014  |
| 14 | NA-PA5      | North America, Linvilla, PA, spring 2011        | 50-100 pooled individuals | SRX661841     | pool-NA-PA5    | SRR1525772             | 90              | 78.1M     | 90            | 90            | Bergland et al., 2014  |
| 15 | NA-PA6      | North America, Linvilla, PA, fall 2011 (pooled) | 50-100 pooled individuals | SRX661842     | pool-NA-PA6    | SRR1525773             | 100             | 73.2M     | 100           | 100           | Bergland et al., 2014  |
| 16 | NA-PA7      | North America, Linvilla, PA, fall 2011 (pooled) | 50-100 pooled individuals | SRX661843     | pool-NA-PA7    | SRR1525774             | 90              | 82.1M     | 90            | 90            | Bergland et al., 2014  |
| 17 | NA-ME1      | North America, Bowdoinham, ME                   | 50-100 pooled individuals | SRX661844     | pool-NA-ME1    | SRR1525698             | 100             | 95M       | 100           | 100           | Bergland et al., 2014  |
| 18 | NA-ME2      | North America, Bowdoinham, ME                   | 50-100 pooled individuals | SRX661845     | pool-NA-ME2    | SRR1525699, SRR2006283 | 100             | 32M, 32M  | 100           | 100           | Bergland et al., 2014  |
| 19 | NA-FL1      | North America, Homestead, FL                    | 50-100 pooled individuals | SRX661832     | pool-NA-FL1    | SRR1525685             | 100             | 64M       | 100           | 100           | Bergland et al., 2014  |
| 20 | NA-FL2      | North America, Homestead, FL                    | 50-100 pooled individuals | SRX661833     | pool-NA-FL2    | SRR1525694             | 100             | 41.6M     | 100           | 100           | Bergland et al., 2014  |
| 21 | EU-AU-LF1   | Austria, lightest females                       | Pool, 100 females         | ERX149369     | pool-EU-AU-LF1 | ERR173225              | 100             | 86.1      | 100           | 100           | Bastide et al., 2013   |
| 22 | EU-AU-LF2   | Austria, lightest females                       | Pool, 100 females         | ERX149370     | pool-EU-AU-LF2 | ERR173226              | 100             | 95.0      | 100           | 100           | Bastide et al., 2013   |
| 23 | EU-AU-DF1   | Austria, darkest females                        | Pool, 100 females         | ERX149371     | pool-EU-AU-DF1 | ERR173227              | 100             | 34.5      | 100           | 100           | Bastide et al., 2013   |
| 24 | EU-AU-DF2   | Austria, darkest females                        | Pool, 100 females         | ERX149372     | pool-EU-AU-DF2 | ERR173228              | 150             | 39.7      | 150           | 85            | Bastide et al., 2013   |
| 25 | EU-AU-DF3   | Austria, darkest females                        | Pool, 100 females         | ERX149373     | pool-EU-AU-DF3 | ERR173229              | 100             | 95.0      | 100           | 100           | Bastide et al., 2013   |
| 26 | EU-AU1      | Austria/Vienna reference                        | Pool, 100-150 females     | ERX149374     | pool-EU-AU1    | ERR173230              | 100             | 41.0      | 100           | 100           | Bastide et al., 2013   |
| 27 | EU-AU2      | Austria/Vienna reference                        | Pool, 100-150 females     | ERX149375     | pool-EU-AU2    | ERR173231              | 150             | 35.3      | 150           | 80            | Bastide et al., 2013   |
| 28 | EU-AU3      | Austria/Vienna reference                        | Pool, 100-150 females     | ERX149376     | pool-EU-AU3    | ERR173232              | 100             | 38.9M     | 100           | 100           | Bastide et al., 2013   |
| 29 | EU-AU4      | Austria/Vienna reference                        | Pool, 100-150 females     | ERX149377     | pool-EU-AU4    | ERR173233              | 150             | 40.7      | 150           | 80            | Bastide et al., 2013   |
| 30 | EU-AU5      | Austria/Vienna reference                        | Pool, 100-150 females     | ERX149378     | pool-EU-AU5    | ERR173234              | 100             | 41.7      | 100           | 100           | Bastide et al., 2013   |
| 31 | EU-AU6      | Austria/Vienna reference                        | Pool, 100-150 females     | ERX149379     | pool-EU-AU6    | ERR173235              | 100             | 41.9      | 100           | 100           | Bastide et al., 2013   |
| 32 | EU-AU7      | Austria/Vienna reference                        | Pool, 100-150 females     | ERX149380     | pool-EU-AU7    | ERR173236              | 100             | 40.8      | 100           | 100           | Bastide et al., 2013   |
| 33 | EU-AU8      | Austria/Vienna reference                        | Pool, 100-150 females     | ERX149381     | pool-EU-AU8    | ERR173237              | 100             | 40.2      | 100           | 100           | Bastide et al., 2013   |
| 34 | EU-AU9      | Austria/Vienna reference                        | Pool, 100-150 females     | ERX149382     | pool-EU-AU9    | ERR173238              | 100             | 40.6M     | 100           | 100           | Bastide et al., 2013   |
| 35 | EU-AU10     | Austria/Vienna reference                        | Pool, 100-150 females     | ERX149383     | pool-EU-AU10   | ERR173239              | 150             | 40.9M     | 150           | 80            | Bastide et al., 2013   |
| 36 | EU-AU11     | Austria/Vienna reference                        | Pool, 100-150 females     | ERX149384     | pool-EU-AU11   | ERR173240              | 100             | 40        | 100           | 100           | Bastide et al., 2013   |
| 37 | EU-AU12     | Austria/Vienna reference                        | Pool, 100-150 females     | ERX149385     | pool-EU-AU12   | ERR173241              | 150             | 40.1      | 150           | 80            | Bastide et al., 2013   |
| 38 | EU-IT-LF1   | Italy, lightest females                         | Pool, 100 females         | ERX149386     | pool-EU-IT-LF1 | ERR173242              | 90              | 14.6      | 90            | 90            | Bastide et al., 2013   |
| 39 | EU-IT-LF2   | Italy, lightest females                         | Pool, 100 females         | ERX149387     | pool-EU-IT-LF2 | ERR173243              | 90              | 15.6      | 90            | 90            | Bastide et al., 2013   |
| 40 | EU-IT-LF3   | Italy, lightest females                         | Pool, 100 females         | ERX149388     | pool-EU-IT-LF3 | ERR173244              | 90              | 15.6      | 90            | 90            | Bastide et al., 2013   |
| 41 | EU-IT-LF4   | Italy, lightest females                         | Pool, 100 females         | ERX149389     | pool-EU-IT-LF4 | ERR173245              | 100             | 138.8     | 100           | 100           | Bastide et al., 2013   |
| 42 | EU-IT-LF5   | Italy, lightest females                         | Pool, 100 females         | ERX149390     | pool-EU-IT-LF5 | ERR173246              | 100             | 131.7     | 100           | 100           | Bastide et al., 2013   |
| 43 | EU-IT-DF1   | Italy, darkest females                          | Pool, 100 females         | ERX149391     | pool-EU-IT-DF1 | ERR173247              | 92              | 11.1      | 92            | 92            | Bastide et al., 2013   |
| 44 | EU-IT-DF2   | Italy, darkest females                          | Pool, 100 females         | ERX149392     | pool-EU-IT-DF2 | ERR173248              | 92              | 10.3      | 92            | 92            | Bastide et al., 2013   |
| 45 | EU-IT-DF3   | Italy, darkest females                          | Pool, 100 females         | ERX149393     | pool-EU-IT-DF3 | ERR173249              | 92              | 9.5       | 92            | 92            | Bastide et al., 2013   |
| 46 | EU-IT-DF4   | Italy, darkest females                          | Pool, 100 females         | ERX149394     | pool-EU-IT-DF4 | ERR173250              | 100             | 138.4     | 100           | 100           | Bastide et al., 2013   |
| 47 | EU-IT-DF5   | Italy, darkest females                          | Pool, 100 females         | ERX149395     | pool-EU-IT-DF5 | ERR173251              | 100             | 138.4     | 100           | 100           | Bastide et al., 2013   |
| 48 | EU-IT1      | Italy, reference                                | Pool, 100-150 females     | ERX149396     | pool-EU-IT1    | ERR173252              | 94              | 21.6      | 94            | 94            | Bastide et al., 2013   |
| 49 | EU-IT2      | Italy, reference                                | Pool, 100-150 females     | ERX149397     | pool-EU-IT2    | ERR173253              | 94              | 17.4      | 94            | 94            | Bastide et al., 2013   |
| 50 | EU-IT3      | Italy, reference                                | Pool, 100-150 females     | ERX149398     | pool-EU-IT3    | ERR173254              | 94              | 15.5      | 94            | 94            | Bastide et al., 2013   |
| 51 | EU-IT4      | Italy, reference                                | Pool, 100-150 females     | ERX149399     | pool-EU-IT4    | ERR173255              | 150             | 132M      | 150           | 150           | Bastide et al., 2013   |
| 52 | EU-IT5      | Italy, reference                                | Pool, 100-150 females     | ERX149400     | pool-EU-IT5    | ERR173256              | 150             | 153M      | 150           | 150           | Bastide et al., 2013   |

**Table S2 Primer Lists**

|                                               |                                     |                                                                             |
|-----------------------------------------------|-------------------------------------|-----------------------------------------------------------------------------|
| <b>Oligos for gDNA libraries construction</b> | PE_Tdot_common_C* linker            | AATGATACGGCGACCACCGAGATCTACACTCTTTCCCTACACGACGCTCTTCCGATC*T                 |
|                                               | Barcoded linker<br>PE_tdot_CAGCACTA | /5Phos/GATCGGAAGAGCGGTTCAGCAGGAATGCCGAGACCGcagcactaATCTCGTATGCCGTCTTCTGCTTG |
|                                               | Barcode linker<br>PE_tdot_AGAGATGC  | /5Phos/GATCGGAAGAGCGGTTCAGCAGGAATGCCGAGACCGagagatgcATCTCGTATGCCGTCTTCTGCTTG |
|                                               | Barcode linker<br>PE_tdot_TCACGTGT  | /5Phos/GATCGGAAGAGCGGTTCAGCAGGAATGCCGAGACCGtcacgtgtATCTCGTATGCCGTCTTCTGCTTG |
|                                               | PE-POSTPCR_1                        | AATGATACGGCGACCACCGAGA                                                      |
|                                               | PE-POSTPCR_2                        | CAAGCAGAAGACGGCATAACGAG                                                     |

Table S2 Primer Lists

**PRIMER SEQUENCE FOR S2c1 INSERTS**

| Sr. no. | SV#  | Chr   | Chr_coord | Chr_coord | TE         | Forward Primer Sequence  | Forward primer Length | Reverse Primer Sequence | Reverse Primer length | Length w/c | Length with TE |
|---------|------|-------|-----------|-----------|------------|--------------------------|-----------------------|-------------------------|-----------------------|------------|----------------|
| 1       | 14   | chr2L | 312233    | 312444    | Stalker2   | ACTGGCAAGACCTCGATTGTC    | 21                    | CGGATTGTCCGACGTATTAGA   | 21                    | 411        | 8661           |
| 2       | 5    | chr2L | 87055     | 87258     | 1731       | GGTGCCGCACAATTCGAGGC     | 21                    | GCTCCGGTCAGAAGATTTTAC   | 22                    | 404        | 5053           |
| 3       | 621  | chr2R | 544728    | 544940    | HMS-Beagle | ATGGGGAACACAGTCAAATG     | 21                    | CATATTATTCAAAGATTGGAT   | 21                    | 353        | 6882           |
| 4       | 630  | chr2R | 2675584   | 2675743   | opus       | GAAGAATGAGACGGGCTACCG    | 21                    | CTGTAATTGTGTACACAGTCA   | 21                    | 332        | 8891           |
| 5       | 1123 | chr3L | 516184    | 516383    | 17.6       | AGTCCTCCAACCGAGATGG      | 20                    | GATTGAATTCAGTTGGCCGG    | 21                    | 349        | 7788           |
| 6       | 1131 | chr3L | 552782    | 552981    | Juan       | TTTATAATAATGTTGCTGGAC    | 21                    | GGCATTCTATAGCCCAACCC    | 21                    | 344        | 4580           |
| 7       | 1743 | chr3R | 6430955   | 6431163   | 3S18       | ATTGAGGCTTTTATTAATCAG    | 21                    | GTTCTATATGCTTGTGATGA    | 21                    | 293        | 6126           |
| 8       | 1762 | chr3R | 7492347   | 7492543   | 1360       | AATACAAGATATTGATACATC    | 21                    | CGAAAGTTCATACAAATGTATA  | 22                    | 374        | 4480           |
| 9       | 2406 | chrX  | 141518    | 141720    | blood      | TTAATGAAGCCGTTGGGCTAGG   | 22                    | CTGTGGTGAATTTGCAGCCTT   | 21                    | 379        | 7790           |
| 10      | 2413 | chrX  | 325934    | 326139    | 1731       | TTTTACACTAAGAGTACCGGC    | 21                    | CGACCTAATAGTCCGGAAGCT   | 21                    | 349        | 4998           |
| 11      | 2427 | chrX  | 1082310   | 1082488   | 297        | AGATAAGACGCCTATTAAGTG    | 21                    | CATTGTATGTTGCATCTGTAG   | 21                    | 373        | 7368           |
| 12      | 32   | chr2L | 522270    | 522480    | 297        | ATTTCGAATACGTATCGAATG    | 21                    | CATTTCCCTGGCAACTTTGCA   | 21                    | 386        | 7381           |
| 13      | 2165 | chr3R | 2.3E+07   | 2.3E+07   | roo        | ATCGCTTTTCCAATAAATTGCAT  | 23                    | CAGAGACAGCGATTTCAAAT    | 21                    | 367        | 9459           |
| 14      | 2531 | chrX  | 6005755   | 6005959   | roo        | ACCTTCACGCAGTCCAGCTTCG   | 22                    | GCACCTGGCAGGGGATTTAATT  | 23                    | 381        | 9473           |
| 15      | 1162 | chr3L | 957937    | 958157    | roo        | TATACAACCACGAGTTCTTGGAAG | 24                    | ACAACATAAATAATTGCAGAGGC | 23                    | 296        | 9388           |

**PRIMER SEQUENCE FOR S2c1 DEPLETION**

| Sr. No. | Chr_cc | Chr_3p | Chr_coord | Chr_coord | repName  | Forward Primer Sequence | Forward Primer Length | Reverse Primer Sequence | Reverse Primer Length | Length w/c | Length with TE | Length with TE depletic |
|---------|--------|--------|-----------|-----------|----------|-------------------------|-----------------------|-------------------------|-----------------------|------------|----------------|-------------------------|
| 1       | chr2L  |        | 7350447   | 7350536   | roo      | CTCGCGGTGAGTCAACCCCGAG  | 21                    | GAGAATTTCCGGTGGTTACGCC  | 22                    | 7480       | 5757           |                         |
| 2       | chrX   |        | 6571315   | 6571399   | Tirant   | CCATATTTAGACAATTATTC    | 20                    | CAGTCCCACAAGTGCGAGCGG   | 23                    | 8802       | 1240           |                         |
| 3       | chr2R  |        | 21753581  | 21753663  | roo      | GAACACTTTAAGCCAGTTTG    | 21                    | GAACCTCAACAATATCCGAT    | 20                    | 833        | 405            |                         |
| 4       | chr3L  |        | 3069878   | 3069958   | Tirant   | GACTCCTATGACGCAATACAG   | 21                    | CATTCTGTATACAAACAAATC   | 22                    | 8912       | 1350           |                         |
| 5       | chr3L  |        | 7889043   | 7889129   | Stalker4 | TATGCCTATAATCAATAAATC   | 21                    | CTTCATGTTGCTACATAAATCAT | 23                    | 2873       | 1107           |                         |
| 6       | chr3L  |        | 7987706   | 7987783   | NOF      | TCCCGAATAGCACCGAATTC    | 21                    | CAATTAATGTGGAATCTCAAG   | 22                    | 2650       | 620            |                         |
| 7       | chr3L  |        | 15426613  | 15426700  | opus     | TTTTGGTCGAGTTCTGTCTG    | 21                    | GAAGTCTTTATAAGTCAAGAA   | 21                    | 3160       | 2642           |                         |
| 8       | chr3R  |        | 24072571  | 24072628  | jockey   | CATTTCTTTGCGCCTGCCATG   | 21                    | GACAGCACTTGGATGATCCA    | 20                    | 341        | 150            |                         |
| 9       | chrX   |        | 3842569   | 3842647   | pogo     | GATCCTTGTCCCGGATAAGTC   | 21                    | GATTTTCCCGTTCTGGAGTAA   | 21                    | 541        | 355            |                         |
| 10      | chr3R  |        | 24931935  | 24932010  | Doc      | TGCAGAATTGTACAAGAGATG   | 21                    | CAGATATGTACAATTCGGACA   | 22                    | 5120       | 395            |                         |

**Table S2 Primer Lists**

| TIDAL only TEIns sites |       |              |              |          |                |                                        |       |                 |                          |           |      |                 |                         |           |      |                         |
|------------------------|-------|--------------|--------------|----------|----------------|----------------------------------------|-------|-----------------|--------------------------|-----------|------|-----------------|-------------------------|-----------|------|-------------------------|
| Site Number            | Chr   | Chr_coord_5p | Chr_coord_3p | TE       | Coverage_Ratio | RAL-765_Inserts_Annotat ed_Insert_Code | Space | FW primer name  | FW primer sequence       | Fw Length | Tm   | RV primer name  | RV primer sequence      | Rv Length | Tm   | Predicted Amplicon Size |
| 1                      | chr2L | 8133670      | 8133752      | HMS-Beag | 2.4            | chr2L_17_8130001                       | 82    | Telns_TID_1_Fw  | GATCAAGTCGACGAAACAATT    | 21        | 56.8 | Telns_TID_1_Rv  | CGCATGCATATAGGCGGATGC   | 21        | 67.7 | 275                     |
| 2                      | chr2L | 19834994     | 19835061     | hobo     | 4.7            | chr2L_20_19830001                      | 67    | Telns_TID_2_Fw  | TAAATATTATCATTTGTGAGCTG  | 23        | 51.9 | Telns_TID_2_Rv  | AGTTTTATGGCATTATGTCTG   | 21        | 54.6 | 354                     |
| 3                      | chr2L | 12227998     | 12228146     | BS       | 5.3            | chr2L_10_12225001                      | 148   | Telns_TID_3_Fw  | CCAGCTGGCACAATGAATG      | 20        | 62.6 | Telns_TID_3_Rv  | CGTTTTAAGCCACATTGCTG    | 21        | 62.7 | 274                     |
| 4                      | chr2R | 12581030     | 12581105     | pogo     | 5              | chr2R_14_12580001                      | 75    | Telns_TID_4_Fw  | ATTTGAAAGAAAAATAGTCATGC  | 22        | 53.1 | Telns_TID_4_Rv  | CCACTAAGCGATGACGAAACGCG | 22        | 69.1 | 333                     |
| 5                      | chr2R | 7621371      | 7621430      | mdg1     | 4              | chr2R_10_7620001                       | 59    | Telns_TID_5_Fw  | ATGTCAAGAATCTGAAGTTACG   | 22        | 53.8 | Telns_TID_5_Rv  | CGTTTGTATGGTCCAATATGC   | 22        | 61.4 | 328                     |
| 6                      | chr3L | 4481564      | 4481640      | roo      | 4.1            | chr3L_14_4480001                       | 76    | Telns_TID_6_Fw  | GAGTGCAGCCCTACTATTAG     | 21        | 51   | Telns_TID_6_Rv  | CACGTTCTTATGTGATAATTA   | 22        | 47.8 | 337                     |
| 7                      | chr3L | 18394377     | 18394445     | 1360     | 4.2            | chr3L_11_18390001                      | 68    | Telns_TID_7_Fw  | TCAAACTATGTGTTTTAAGAGTAT | 24        | 50   | Telns_TID_7_Rv  | CAGGGTGGATTCCGCTATCAGC  | 21        | 64   | 360                     |
| 8                      | chr3R | 4885334      | 4885399      | 1360     | 1.7            | chr3R_13_4885001                       | 65    | Telns_TID_8_Fw  | ATTTATGCCAGTCACTGGGCC    | 20        | 62   | Telns_TID_8_Rv  | CGAGCAAGAATGACCTCAAGT   | 22        | 58.5 | 354                     |
| 9                      | chr3R | 20125023     | 20125087     | jockey   | 2.4            | chr3R_12_20125001                      | 64    | Telns_TID_9_Fw  | AATTGACTTGCACCATGTGC     | 21        | 63.3 | Telns_TID_9_Rv  | CCGAGTCAATGGGAGTGGCC    | 21        | 71.3 | 360                     |
| 10                     | chr3R | 11089486     | 11089562     | roo      | 5.4            | chr3R_15_11085001                      | 76    | Telns_TID_10_Fw | TTTGAACACAATTTGGAAGTG    | 21        | 56.2 | Telns_TID_10_Rv | CAGTCCGCCCAAGAAACCAAA   | 21        | 66.5 | 359                     |
| 11                     | chrX  | 7785488      | 7785556      | hobo     | 3.3            | chrX_10_7785001                        | 68    | Telns_TID_11_Fw | AAGTTTTATGACCTCCATATG    | 21        | 51.1 | Telns_TID_11_Rv | CATTAATTTCCGCAGCACAGC   | 21        | 62.9 | 342                     |
| 12                     | chrX  | 15391856     | 15391929     | roo      | 4.1            | chrX_13_15390001                       | 73    | Telns_TID_12_Fw | TATATATTCGGTAAAACCTG     | 22        | 53.3 | Telns_TID_12_Rv | CTTTGCATGATAACATTAAGT   | 21        | 49.9 | 341                     |

**Table S2 Primer Lists**

TIDAL and Lnb shared sites

| Site Number | Chr   | Chr_coord_5p | Chr_coord_3p | TE        | Coverage_Ratio | Tidal Insert Code | LnB765    | TIDAL     | CnT       | TEMP | Space | FW primer name  | FW primer sequence     | Fw Length | Tm   | RV primer name  | RV primer sequence     | Rv Length | Tm   | Predicted Amplicon Size |
|-------------|-------|--------------|--------------|-----------|----------------|-------------------|-----------|-----------|-----------|------|-------|-----------------|------------------------|-----------|------|-----------------|------------------------|-----------|------|-------------------------|
| 1           | chr2L | 267478       | 267547       | P-element | 4.4            | chr2L_18          | chr2L_265 | chr2L_265 | chr2L_265 |      | 69    | Telns_LnB_1_Fw  | ACATACACAGAGACAGGAAAGC | 22        | 56.1 | Telns_LnB_1_Rv  | CGAATTTATGGAAATCAGCATT | 22        | 58.2 | 314                     |
| 2           | chr2L | 1167146      | 1167232      | opus      | 2.6            | chr2L_21          | chr2L_116 | chr2L_116 | chr2L_116 |      | 86    | Telns_LnB_2_Fw  | CTCCACTATAACGTTACCCAAC | 22        | 55.3 | Telns_LnB_2_Rv  | CAAGAGACATTGCGCAGGT    | 20        | 63.6 | 386                     |
| 3           | chr2L | 20800099     | 20800248     | Burdock   | 5.8            | chr2L_22          | chr2L_208 | chr2L_208 | chr2L_208 |      | 149   | Telns_LnB_3_Fw  | CCTCCTGCTCCCAACCACTGG  | 21        | 63.1 | Telns_LnB_3_Rv  | GACCTCTCCTCTCTTATT     | 21        | 51.8 | 329                     |
| 4           | chr2R | 9380884      | 9380961      | 3518      | 2.4            | chr2R_16          | chr2R_938 | chr2R_938 | chr2R_938 |      | 77    | Telns_LnB_4_Fw  | GGGGAGAAAATGGGAGAAAGC  | 21        | 63.1 | Telns_LnB_4_Rv  | CCAAGTCGAAAATGTTGCTC   | 21        | 59.7 | 365                     |
| 5           | chr2R | 9442941      | 9443015      | 412       | 3.9            | chr2R_13          | chr2R_944 | chr2R_944 | chr2R_944 |      | 74    | Telns_LnB_5_Fw  | TGTCAAGAATCTGAAGTTACG  | 21        | 53.1 | Telns_LnB_5_Rv  | GATTCGTTGTTATGGTGCCA   | 21        | 57.5 | 331                     |
| 6           | chr2R | 11578561     | 11578638     | blood     | 5.6            | chr2R_14          | chr2R_115 | chr2R_115 | chr2R_115 |      | 77    | Telns_LnB_6_Fw  | CATTTTGTAGTCGAGACCTCAT | 22        | 58.8 | Telns_LnB_6_Rv  | TGTCAAGTGTATATGCTTCT   | 21        | 50.1 | 372                     |
| 7           | chr3L | 934796       | 934851       | hobo      | 8.3            | chr3L_15          | chr3L_930 | chr3L_930 |           |      | 55    | Telns_LnB_7_Fw  | ATACGGAAATCAAACATATGTG | 21        | 52   | Telns_LnB_7_Rv  | TGGATTCTGCTCAGGATGTG   | 21        | 61   | 364                     |
| 8           | chr3L | 22566716     | 22566793     | hobo      | 4.3            | chr3L_32          | chr3L_225 | chr3L_225 |           |      | 77    | Telns_LnB_8_Fw  | TTGCACTGCTATTGCAAGAAAG | 21        | 59.3 | Telns_LnB_8_Rv  | CAATCGTCTCATTTGTATG    | 21        | 55.7 | 367                     |
| 9           | chr3R | 18968019     | 18968094     | Burdock   | 3.8            | chr3R_19          | chr3R_189 | chr3R_189 |           |      | 75    | Telns_LnB_9_Fw  | AGAGTGTATCTGGGAGAGAG   | 21        | 50.2 | Telns_LnB_9_Rv  | GTCACATTTTTCGCCCTCAG   | 22        | 63.9 | 375                     |
| 10          | chr3R | 30626323     | 30626403     | 412       | 5.2            | chr3R_22          | chr3R_306 | chr3R_306 |           |      | 80    | Telns_LnB_10_Fw | GAAATCAAATGCCGCTTTCATG | 23        | 66.5 | Telns_LnB_10_Rv | CTAGATTAGTGCATATTAAG   | 23        | 52.3 | 379                     |
| 11          | chrX  | 6487781      | 6487856      | blood     | 4.3            | chrX_18           | chrX_648  | chrX_648  | chrX_64   |      | 75    | Telns_LnB_11_Fw | TTTCATTCAAATGCTTATGC   | 21        | 55.6 | Telns_LnB_11_Rv | CATGTAATGCGTCATCATG    | 21        | 58.5 | 375                     |
| 12          | chrX  | 21399401     | 21399469     | pogo      | 3.6            | chrX_12           | chrX_2139 | chrX_2139 |           |      | 68    | Telns_LnB_12_Fw | CGTGAGGTAAGTGAATTC     | 21        | 56.4 | Telns_LnB_12_Rv | CGATGCTGCAAAAACAAT     | 21        | 61   | 321                     |

**Table S2 Primer Lists**

CnT Only sites

| Site Number | Insert_code    | Chr   | Start    | Stop     | Space | FW primer name  | FW primer sequence       | Fw Length | Tm   | RV primer name  | RV primer sequence      | Rv Length | Tm   | Predicted Amplicon Size |
|-------------|----------------|-------|----------|----------|-------|-----------------|--------------------------|-----------|------|-----------------|-------------------------|-----------|------|-------------------------|
| 1           | chrX_4330001   | chrX  | 4334105  | 4334327  | 222   | Telns_CnT_1_Fw  | CTAGGCTACTCTAAAAGATATC   | 23        | 50.8 | Telns_CnT_1_Rv  | ACGAGGCTAAAATAAAGGCC    | 21        | 60.8 | 376                     |
| 2           | chrX_14000001  | chrX  | 14001033 | 14007159 | 6126  | Telns_CnT_2_Fw  | AACAAGAGAGAATGTCTATAGTCG | 23        | 54.8 | Telns_CnT_2_Rv  | GATGAATTTTCGCAATTCACA   | 21        | 58.6 | 6092                    |
| 3           | chr3R_7695001  | chr3R | 7696150  | 7703338  | 7188  | Telns_CnT_3_Fw  | CCACACTTATATTA ATTGGCA   | 22        | 53.1 | Telns_CnT_3_Rv  | GATCTCTGCCGCTGTCACTG    | 21        | 65.8 | 7171                    |
| 4           | chr3R_14020001 | chr3R | 14021702 | 14023463 | 1761  | Telns_CnT_4_Fw  | CAGTTTGTCAAGAAAATGTTTAC  | 23        | 53.6 | Telns_CnT_4_Rv  | CAGTTTGTCAAGAAAATGTTT   | 21        | 52.2 | 1734                    |
| 5           | chr3L_4360001  | chr3L | 4361048  | 4361901  | 853   | Telns_CnT_5_Fw  | AGCTCAAAGAAAGCTGGGTCTG   | 21        | 65.2 | Telns_CnT_5_Rv  | CCATGAAATGAAACAATGATTA  | 23        | 56.7 | 844                     |
| 6           | chr3L_17180001 | chr3L | 17180645 | 17180660 | 15    | Telns_CnT_6_Fw  | ACGATTTTCCGCTCACGC       | 19        | 66.8 | Telns_CnT_6_Rv  | GCCGAAATTTGTAGTTAAAAT   | 21        | 52.2 | 394                     |
| 7           | chr2R_6945001  | chr2R | 6948454  | 6948972  | 518   | Telns_CnT_7_Fw  | TCTAAAGTCTGTTCCTCTGAC    | 21        | 56.9 | Telns_CnT_7_Rv  | CGTAAATTAATTTGGTTGAGGA  | 22        | 56   | 493                     |
| 8           | chr2R_13060001 | chr2R | 13064762 | 13064861 | 99    | Telns_CnT_8_Fw  | TATATTATGCCAGTCATGGG     | 21        | 55.2 | Telns_CnT_8_Rv  | CGAGCAAGAATGACCTCAAGT   | 22        | 58.5 | 357                     |
| 9           | chr2L_1805001  | chr2L | 1809645  | 1810122  | 477   | Telns_CnT_9_Fw  | TTCAGGATAGTTGTCTAAACA    | 23        | 53.6 | Telns_CnT_9_Rv  | ATTCGGAGAAATTTATTCGCA   | 21        | 57.7 | 447                     |
| 10          | chr2L_9780001  | chr2L | 9783398  | 9783415  | 17    | Telns_CnT_10_Fw | ATACGGGGTGGCTGTAACCTCC   | 22        | 63.4 | Telns_CnT_10_Rv | CGTTCTTTGCAACGAATCAATTG | 23        | 61.7 | 394                     |
| 11          | chr4_180001    | chr4  | 180927   | 183823   | 2896  | Telns_CnT_11_Fw | CTTTCTTATACGCATACATTG    | 21        | 50.6 | Telns_CnT_11_Rv | CGGCCATACACATTGGTCTTG   | 21        | 63.5 | 2892                    |
| 12          | chr4_1000001   | chr4  | 999517   | 1001425  | 1908  | Telns_CnT_12_Fw | GTTCTGATTTACTAGCTAAGG    | 23        | 52.4 | Telns_CnT_12_Rv | GTTACTCAGCAAAACGATGAGT  | 21        | 52.9 | 2008                    |

**Table S2 Primer Lists**

TEMP Only Sites

| Site Number | Chr   | Start   | Stop    | rounder | InsertCode    | Space | FW primer name  | FW primer sequence       | Fw Length | Tm   | RV primer name  | RV primer sequence      | Rv Length | Tm   | Predicted Amplicon Size |
|-------------|-------|---------|---------|---------|---------------|-------|-----------------|--------------------------|-----------|------|-----------------|-------------------------|-----------|------|-------------------------|
| 1           | chr2L | 9850436 | 9850443 | 9850001 | chr2L_9850001 | 7     | Telns_TEM_1_Fw  | GGTTGCTGTGTCTCTCTG       | 20        | 60.5 | Telns_TEM_1_Rv  | GGTTCAGGTGAGGAGGAGCAG   | 20        | 62   | 383                     |
| 2           | chr2L | 1558495 | 1558995 | 1555001 | chr2L_1555001 | 500   | Telns_TEM_2_Fw  | CAGACAAAAGTAATGTGAAAC    | 21        | 50   | Telns_TEM_2_Rv  | CAACCATTAATGCTATATCA    | 21        | 50.7 | 482                     |
| 3           | chr2R | 5334166 | 5334666 | 5330001 | chr2R_5330001 | 500   | Telns_TEM_3_Fw  | CCGTGTAGGCTTACAAGCAATAG  | 23        | 60.2 | Telns_TEM_3_Rv  | CTTGTTGGTGGCAAAGTCAATG  | 21        | 59.2 | 494                     |
| 4           | chr2R | 2095477 | 2095485 | 2095001 | chr2R_2095001 | 8     | Telns_TEM_4_Fw  | GTGCACTATGTATGGAGCTCGG   | 23        | 65.2 | Telns_TEM_4_Rv  | CTTACAATAGATTTAATGCTTT  | 23        | 50   | 405                     |
| 5           | chr3L | 9571935 | 9572435 | 9570001 | chr3L_9570001 | 500   | Telns_TEM_5_Fw  | TCGCGAAATGTAAGGTATAGTG   | 22        | 57   | Telns_TEM_5_Rv  | GTTTCGATGGATACGAAAACA   | 21        | 57.6 | 482                     |
| 6           | chr3L | 5056174 | 5056674 | 5055001 | chr3L_5055001 | 500   | Telns_TEM_6_Fw  | CAATCCGCACTAGACACTCAC    | 22        | 63.2 | Telns_TEM_6_Rv  | GGCTCTAATCGTTAGTTATAAA  | 25        | 52.1 | 499                     |
| 7           | chr3R | 5035704 | 5035739 | 5035001 | chr3R_5035001 | 35    | Telns_TEM_7_Fw  | TGAATTTTACATTAAGGCGG     | 21        | 57   | Telns_TEM_7_Rv  | AATCCGAACCCGAATCGGAA    | 20        | 65.8 | 296                     |
| 8           | chr3R | 1211275 | 1211285 | 1210001 | chr3R_1210001 | 10    | Telns_TEM_8_Fw  | TAGAACTATGATGATCAAGGG    | 24        | 50.8 | Telns_TEM_8_Rv  | GTGATTCGCTTAGTTTTGTTT   | 21        | 53.8 | 398                     |
| 9           | chrX  | 294866  | 294869  | 290001  | chrX_290001   | 3     | Telns_TEM_9_Fw  | ATTGATGCAATAATTTCAACTG   | 23        | 52.6 | Telns_TEM_9_Rv  | CGCATTTCGCTGGTCTGAC     | 21        | 61.8 | 395                     |
| 10          | chrX  | 5410656 | 5411156 | 5410001 | chrX_5410001  | 500   | Telns_TEM_10_Fw | GTTAATAGTAATTAGCACATTGCA | 24        | 53.5 | Telns_TEM_10_Rv | GAATCTCCGATATCATCAACGA  | 22        | 59   | 488                     |
| 11          | chrY  | 203747  | 204247  | 200001  | chrY_200001   | 500   | Telns_TEM_11_Fw | CGTATCAGACAATCTAGTAGCAG  | 23        | 53.8 | Telns_TEM_11_Rv | GGACAACCACTTTTATAAT     | 20        | 52.3 | 487                     |
| 12          | chrY  | 1565254 | 1565753 | 1565001 | chrY_1565001  | 499   | Telns_TEM_12_Fw | TCATCAAATCGGAGACTCC      | 21        | 60.1 | Telns_TEM_12_Rv | ATGAATTTGTTCTATTTGAACTC | 23        | 52.2 | 645                     |

**Primers for TE InDels In the ISO1-BL Line**

**TE Insertions**

| Site Number | Chr   | Chr_coor_d_5p | Chr_coor_d_3p | TE        | Coverage_Ratio | FW primer name | FW primer sequence      | Fw Length | Tm   | RV primer name | RV primer sequence      | Rv Length | Tm   | Amplicon Size |
|-------------|-------|---------------|---------------|-----------|----------------|----------------|-------------------------|-----------|------|----------------|-------------------------|-----------|------|---------------|
| 1           | chr2R | 2E+07         | 19768307      | copia     | 4.5            | ISO1_BL_F11    | TGCTAGAATTGCTATGCCGC    | 22        | 65.5 | ISO1_BL_R11    | GTTTAAGTAAGGATCGATTTTAG | 23        | 51.5 | 295bp         |
| 2           | chr3L | 4390337       | 4390468       | roo       | 4.5            | ISO1_BL_F12    | GTTGGACAAAGGAATCGGTAATG | 23        | 61.8 | ISO1_BL_R12    | GCATTCGTACTGTTCCAGCA    | 22        | 62.5 | 330bp         |
| 3           | chr2R | 8528862       | 8528983       | l-element | 4.4            | ISO1_BL_F13    | CCATAAAACGCACATATTGC    | 21        | 61.3 | ISO1_BL_R13    | TTCCCGCTTCCCACTTTC      | 19        | 60.1 | 273bp         |
| 4           | chr3R | 3E+07         | 29777247      | F-element | 17.9           | ISO1_BL_F14    | TGGCGCTACGCTAATGAAATC   | 21        | 62.4 | ISO1_BL_R14    | GCGGTCCTGATAAACGTATTT   | 21        | 58.2 | 414bp         |
| 5           | chr2L | 1068653       | 1068778       | FB        | 4.2            | ISO1_BL_F15    | CTGATAAGCGGCAGCATAAGCAG | 23        | 65.3 | ISO1_BL_R15    | GAGCCAAGCTTAGGCTGCAATT  | 22        | 64.1 | 517bp         |
| 6           | chrX  | 6542904       | 6543018       | l-element | 4.3            | ISO1_BL_F16    | TTGAAGTTGGCCATTACGGG    | 21        | 64.1 | ISO1_BL_R16    | GGACGCCAATGGAGCTTATTG   | 21        | 63.9 | 501bp         |
| 7           | chrX  | 1.9E+07       | 19018748      | copia     | 4.7            | ISO1_BL_F17    | AAGATTTAGAGACTCCACC     | 21        | 52.6 | ISO1_BL_R17    | GCTTAAGGCCCGCAACAA      | 19        | 65.6 | 469bp         |
| 8           | chr3R | 5066592       | 5066727       | Tirant    | 4.4            | ISO1_BL_F18    | TTATTACCACAGCTAAGAGTC   | 21        | 49.1 | ISO1_BL_R18    | GATATGCTAATTCGGCGCG     | 19        | 61.6 | 515bp         |
| 9           | chrX  | 1.1E+07       | 10556301      | Doc       | 5.7            | ISO1_BL_F19    | AGCCAAGATCTGTCATTTGTC   | 21        | 56.8 | ISO1_BL_R19    | CAACACACACAGCGAAGCGTA   | 21        | 64.6 | 363bp         |
| 10          | chr2L | 5999659       | 5999785       | hobo      | 5.6            | ISO1_BL_F110   | GTCGAAGTGCAGGAAACGT     | 19        | 63.5 | ISO1_BL_R110   | CAAATTCCTTAAAGCAAGGCTT  | 22        | 59   | 479bp         |
| 11          | chr2R | 2.3E+07       | 22786444      | hobo      | 5.3            | ISO1_BL_F111   | AAGAATTTCTTTCCCAAGCTC   | 22        | 58.1 | ISO1_BL_R111   | GGTATACTTACCTTTTATGCG   | 22        | 50.6 | 523bp         |
| 12          | chr2L | 9485261       | 9485390       | hobo      | 4.2            | ISO1_BL_F112   | GAGTGTGCAGAGTCCGCTG     | 21        | 63.6 | ISO1_BL_R112   | CTAGTAGAATGATTTGGGCCAA  | 23        | 59.5 | 514bp         |

**TE Depletions**

| Site Number | Chr   | Chr_coor_d_5p | Chr_coor_d_3p | TE         | Coverage_Ratio | FW primer name | FW primer sequence      | Fw Length | Tm   | RV primer name | RV primer sequence      | Rv Length | Tm   | Predicted Amplicon Size | RV primer name | RV primer sequence     | Rv Length | Tm   | Predicted Amplicon Size |
|-------------|-------|---------------|---------------|------------|----------------|----------------|-------------------------|-----------|------|----------------|-------------------------|-----------|------|-------------------------|----------------|------------------------|-----------|------|-------------------------|
| 1           | chrX  | 6335185       | 6335241       | Tirant     | 4.6            | ISO1_BL_FD1    | GCTGATTACGAATCACTTGAAG  | 23        | 58.1 | ISO1_BL_RD1    | GGCTAGCTGGGACAATGTTG    | 21        | 64   | 380bp                   | ISO1_BL_RD1.1  | CGTCATTGTATCGCGCTTATA  | 21        | 58.8 | 2757b.p.                |
| 2           | chr3R | 5045818       | 5045876       | HMS-Beagle | 4.4            | ISO1_BL_FD2    | GGTTACACAAGAGCGTGCAGC   | 21        | 63.2 | ISO1_BL_RD2    | CTAAGTCCCTAGCAATCAAGTGA | 23        | 57.7 | 448bp                   | ISO1_BL_RD2.1  | GCCACTTATTATAAATGCA    | 22        | 50   | 7393                    |
| 3           | chr3R | 3.2E+07       | 31691562      | Doc        | 4.3            | ISO1_BL_FD3    | AAGAGCGACTGAATAACGAAG   | 21        | 56.4 | ISO1_BL_RD3    | CCAGAACAATATGGAATAATT   | 21        | 51.1 | 449bp                   | ISO1_BL_RD3.1  | GTCATATCTGCTGCCACGC    | 20        | 64   | 5068                    |
| 4           | chr3R | 1.7E+07       | 16756346      | diver      | 3.6            | ISO1_BL_FD4    | CAATAAAACAGCGCGGCAC     | 19        | 64.1 | ISO1_BL_RD4    | CTGAACCTGTATCTTCTTTCGCG | 23        | 57.4 | 436 bp                  | ISO1_BL_RD4.1  | GGCCACTCGGAGTGGCTC     | 19        | 65   | 6493                    |
| 5           | chr2L | 1.3E+07       | 12861728      | hobo       | 3.5            | ISO1_BL_FD5    | ATTTATCTTATCTGTTATCCCA  | 24        | 53.9 | ISO1_BL_RD5    | CGACGCAAAACACGTTATGA    | 21        | 64.1 | 458bp                   | ISO1_BL_RD5.1  | TACTCCAGAATGCGGTGGAG   | 21        | 61.2 | 1720                    |
| 6           | chr2L | 1.8E+07       | 17951978      | hobo       | 3.5            | ISO1_BL_FD6    | TAGAGCTAAGCCAGCCAGGAC   | 21        | 61   | ISO1_BL_RD6    | CACTCGAGTATTTTGTGTGCC   | 22        | 59.7 | 381bp                   | ISO1_BL_RD6.1  | AACTGTACAGGATGATACAG   | 21        | 50   | 1785                    |
| 7           | chr3L | 2927813       | 2927871       | Tirant     | 3.5            | ISO1_BL_FD7    | GTACAGAGATAAAGAAGAACTAA | 23        | 50.5 | ISO1_BL_RD7    | GACTCGAGTAGCCACTCTCTG   | 21        | 55.9 | 393bp                   | ISO1_BL_RD7.1  | TGTTGTTTTGGTGTATACAA   | 23        | 57.9 | 8527                    |
| 8           | chrX  | 1.2E+07       | 11633445      | 297        | 2.9            | ISO1_BL_FD8B   | AACACAGATCAAGTGTGAGT    | 21        | 52.8 | ISO1_BL_RD8B   | TCTCCTCAATCCAATTTGCAT   | 21        | 59.5 | 430bp                   | ISO1_BL_RD8.1  | CAGAATGGAAATAAATTTGTT  | 21        | 51.4 | 7371                    |
| 9           | chr3L | 8481746       | 8481802       | roo        | 3.3            | ISO1_BL_FD9B   | AGTAGCTGTGGATCTGTGGC    | 20        | 57.9 | ISO1_BL_RD9B   | ATTTACTTAGGCCTCTGCGTA   | 21        | 56   | 408bp                   | ISO1_BL_RD9.1  | TTGCGTTCGATCTGTGAGA    | 21        | 63.1 | 9454                    |
| 10          | chr2R | 7608382       | 7608431       | l-element  | 2.6            | ISO1_BL_FD10B  | ATTCAAGCGTATTGTTATTG    | 21        | 52.4 | ISO1_BL_RD10B  | CATAAACAGCCAGCAATTAGTT  | 22        | 56.3 | 317bp                   | ISO1_BL_RD10.1 | TGATCGAAATGGGTAAAGTTCG | 23        | 61.2 | 5489                    |
| 11          | chr2R | 8398189       | 8398240       | Doc        | 3              | ISO1_BL_FD11B  | TGGGAGACGGTGGATAGGTAG   | 21        | 61.4 | ISO1_BL_RD11B  | GTAGGTGCACCTGGAGCACC    | 20        | 57.2 | 399bp                   | ISO1_BL_RD11.1 | GAGGCACGAACCTGCTGGCT   | 19        | 65   | 5061                    |
| 12          | chr3R | 3.1E+07       | 31279405      | diver      | 2.5            | ISO1_BL_FD12B  | AGAGATCCAAATTCAAATATG   | 21        | 51.1 | ISO1_BL_RD12B  | ATCAGCTGTATCGCTATGAC    | 21        | 57.8 | 301bp                   | ISO1_BL_RD12.1 | CTTGCTAAAACCCACACAC    | 20        | 58.1 | 6402                    |
